# Supplementary material for: A palladium-catalyzed sequential Heck coupling/C–C bond activation approach to oxindoles with all-carbon-quaternary centers
Source: Royal Society of Chemistry journal article supplement (doi:10.1039/d1ob02440j), 2022-01-01

## Supporting Information

# Palladium-Catalyzed Sequential Heck Coupling/C-C Bond Activation Approach to Oxindoles with All-Carbon-Quaternary Centers

Guoliang Mao,<sup>‡\*a</sup> Chenxiang Meng,<sup>‡<sup>ab</sup></sup> Fangyuan Cheng,<sup>b</sup> Wenbo Wu,<sup>b</sup> Yuan-Yuan Gao,<sup>\*b</sup> Gao-Wei Li<sup>b</sup> and Lantao Liu<sup>\*bc</sup>

*a.* Provincial Key Laboratory of Oil and Gas Chemical Technology, College of Chemistry and Chemical Engineering, Northeast Petroleum University, Daqing, China. E-mail: [maoguoliang@nepu.edu.cn](mailto:maoguoliang@nepu.edu.cn)

*b.* Henan Engineering Laboratory of Green Synthesis for Pharmaceuticals, College of Chemistry and Chemical Engineering, Shangqiu Normal University, Shangqiu 476000, China. E-mail: [gaoyuanyuan@iccas.ac.cn](mailto:gaoyuanyuan@iccas.ac.cn)

*c.* College of Chemistry, Zhengzhou University, Zhengzhou 450001, China. E-mail: [liult05@iccas.ac.cn](mailto:liult05@iccas.ac.cn)

<sup>‡</sup>These authors contributed equally to this work and should be considered cofirst authors.

### Table of Contents

|                                                                                      |     |
|--------------------------------------------------------------------------------------|-----|
| 1. General information .....                                                         | S2  |
| 2. General Procedure for the Synthesis of Products 3 and Characterization Data ..... | S2  |
| 3. Gram-Scale Reaction .....                                                         | S13 |
| 4. Primitive Results of Enantioselective Reaction .....                              | S14 |
| 5. X-Ray Crystal Structure of Enantiopure 3aa .....                                  | S16 |
| 6. Reference .....                                                                   | S23 |
| 7. <sup>1</sup> H, <sup>19</sup> F, <sup>13</sup> C NMR Spectras.....                | S24 |

## 1. General information

$^1\text{H}$ ,  $^{13}\text{C}$ , and  $^{19}\text{F}$  NMR spectrometers were recorded on Bruker-400 MHz instruments internally referenced to tetramethylsilane (0.0 ppm) or residue of  $\text{CDCl}_3$  (7.26 ppm) signal. Melting points were measured using a XT4A microscopic apparatus. IR spectra were obtained on a Bruker VECTOR22 spectrophotometer in KBr pellets. All reactions were performed under an inert atmosphere of dry nitrogen in glassware, unless otherwise stated. Solvents and chemicals were bought from commercial sources and used directly unless otherwise stated. Column chromatography was performed on 300-400 mesh silica gel. The substrates  $1\text{a}^{1-6}$  and  $2^7$  were synthesized according to published procedures. Analytical thin-layer chromatography (TLC) was performed on pre-coated, glass-backed silica gel plates.

## 2. General Procedure for the Synthesis of Products 3 and Characterization Data

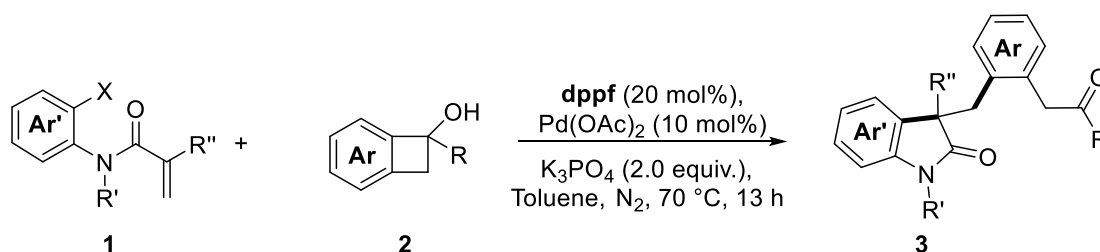

To a 10 mL Schlenk tube, **1** (0.1 mmol), **2** (0.12 mmol),  $\text{K}_3\text{PO}_4$  (0.2 mmol, 2.0 equiv.),  $\text{Pd}(\text{OAc})_2$  (0.01 mmol, 10 mol%), **dppf** (0.02 mmol, 20.0 mol%), and toluene (1.0 mL) were added sequentially under a  $\text{N}_2$  atmosphere. The reaction mixture was stirred at  $70^\circ\text{C}$  for 13 h. After the reaction was complete (monitored by TLC), the resulting mixture was filtered with ethyl acetate and concentrated, then the residue was purified by preparative TLC (petroleum ether : ethyl acetate = 3 : 1) directly and delivered the desired product.

### Characterization data of the products.

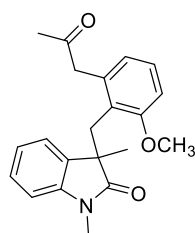

#### **3-(2-methoxy-6-(2-oxopropyl)benzyl)-1,3-dimethylindolin-2-one (3aa) :**

White Solid; (99% yield, petroleum ether: ethyl acetate = 3 : 1,  $R_f$  = 0.28) m.p. =  $107 - 108^\circ\text{C}$ .  $^1\text{H}$  NMR (400 MHz,  $\text{CDCl}_3$ )  $\delta$  7.16 (td,  $J$  = 7.7, 1.3 Hz, 1H), 7.10 (t,  $J$  = 7.9 Hz, 1H), 6.87 (td,  $J$  = 7.5, 0.9 Hz, 1H), 6.76 (dd,  $J$  = 7.4, 0.8 Hz, 1H), 6.74 (d,  $J$  = 7.7 Hz, 1H), 6.64 (d,  $J$  = 7.9 Hz, 2H), 3.57 (s, 3H), 3.49 (dd,  $J$  = 19.9, 16.6 Hz, 2H), 3.37 (d,  $J$  = 14.0 Hz, 1H), 3.15 (s, 3H), 2.90 (d,  $J$  = 13.9 Hz, 1H), 2.03 (s, 3H), 1.38 (s, 3H).  $^{13}\text{C}$  NMR (101 MHz,  $\text{CDCl}_3$ )  $\delta$  206.5, 181.0, 158.4, 142.8, 135.5, 133.6, 127.6, 127.5, 124.4, 124.1, 122.7, 121.6, 108.7, 107.6, 54.6, 49.1, 48.4, 33.1, 29.5, 26.2, 22.97. IR (KBr,  $\text{cm}^{-1}$ ): 2965, 2923, 1711, 1613, 1584, 1493, 1471, 1377, 1351, 1261, 1158, 1104, 749. HRMS (ESI): calcd for  $\text{C}_{21}\text{H}_{23}\text{NNaO}_3$   $[\text{M}+\text{Na}]^+$  360.1570, found 360.1568.

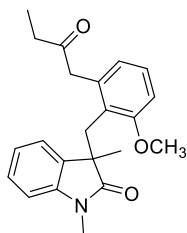

**3-(2-methoxy-6-(2-oxobutyl)benzyl)-1,3-dimethylindolin-2-one (3ab):** Yellow oil; (99% yield, petroleum ether: ethyl acetate = 3 : 1,  $R_f$  = 0.34).  $^1\text{H}$  NMR (400 MHz,  $\text{CDCl}_3$ )  $\delta$  7.17 (td,  $J$  = 7.7, 1.3 Hz, 1H), 7.10 (t,  $J$  = 7.9 Hz, 1H), 6.87 (td,  $J$  = 7.5, 1.1 Hz, 1H), 6.74 (dd,  $J$  = 7.5, 1.2 Hz, 2H), 6.64 (d,  $J$  = 7.9 Hz, 2H), 3.57 (s, 3H), 3.45 (s, 2H), 3.36 (d,  $J$  = 13.9 Hz, 1H), 3.15 (s, 3H), 2.89 (d,  $J$  = 14.0 Hz, 1H), 2.35-2.29 (m, 2H), 1.38 (s, 3H), 0.96 (t,  $J$  = 7.3 Hz, 3H).  $^{13}\text{C}$  NMR (101 MHz,  $\text{CDCl}_3$ )  $\delta$  209.1, 181.0, 158.4, 142.8, 135.8, 133.7, 127.6, 127.5, 124.4, 124.1, 122.7, 121.7, 108.6, 107.6, 54.6, 49.1, 47.2, 35.3, 33.1, 26.2, 22.9, 7.8. IR (KBr,  $\text{cm}^{-1}$ ): 2970, 2937, 1715, 1613, 1584, 1494, 1471, 1377, 1350, 1302, 1264, 1106, 755. HRMS (ESI): calcd for  $\text{C}_{22}\text{H}_{26}\text{NO}_3$   $[\text{M}+\text{H}]^+$  352.1907, found 352.1901.

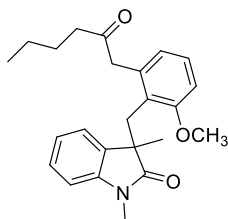

**3-(2-methoxy-6-(2-oxohexyl)benzyl)-1,3-dimethylindolin-2-one (3ac):** Yellow oil; (99% yield, petroleum ether : ethyl acetate = 3 : 1,  $R_f$  = 0.52 ).  $^1\text{H}$  NMR (400 MHz,  $\text{CDCl}_3$ )  $\delta$  7.17 (t,  $J$  = 7.8 Hz, 1H), 7.09 (t,  $J$  = 7.9 Hz, 1H), 6.87 (t,  $J$  = 7.5 Hz, 1H), 6.74 (d,  $J$  = 7.5 Hz, 2H), 6.63 (d,  $J$  = 6.9 Hz, 2H), 3.57 (s, 3H), 3.45 (s, 2H), 3.36 (d,  $J$  = 14.0 Hz, 1H), 3.15 (s, 3H), 2.87 (d,  $J$  = 13.9 Hz, 1H), 2.30 (t,  $J$  = 7.4 Hz, 2H), 1.49-1.42 (m, 2H), 1.37 (s, 3H), 1.27 – 1.17 (m, 2H), 0.84 (t,  $J$  = 7.3 Hz, 3H).  $^{13}\text{C}$  NMR (101 MHz,  $\text{CDCl}_3$ )  $\delta$  208.7, 181.0, 158.4, 142.8, 135.7, 133.7, 127.5, 127.5, 124.4, 124.1, 122.7, 121.7, 108.6, 107.5, 54.6, 49.1, 47.6, 41.9, 33.2, 26.2, 25.9, 22.9, 22.3, 13.9. IR (KBr,  $\text{cm}^{-1}$ ): 2960, 2933, 1714, 1614, 1584, 1493, 1471, 1377, 1349, 1262, 1106, 754. HRMS (ESI): calcd for  $\text{C}_{24}\text{H}_{30}\text{NO}_3$   $[\text{M}+\text{H}]^+$  388.2220, found 380.2224.

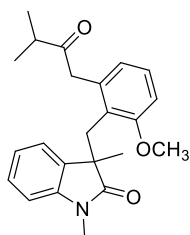

**3-(2-methoxy-6-(3-methyl-2-oxobutyl)benzyl)-1,3-dimethylindolin-2-one (3ad):** Yellow oil; (99% yield, petroleum ether : ethyl acetate = 3 : 1,  $R_f$  = 0.46).  $^1\text{H}$  NMR (400 MHz,  $\text{CDCl}_3$ )  $\delta$  7.18 (td,  $J$  = 7.7, 1.2 Hz, 1H), 7.10 (t,  $J$  = 7.9 Hz, 1H), 6.89 (td,  $J$  = 7.5, 1.0 Hz, 1H), 6.76 – 6.74 (m, 2H), 6.64 (dd,  $J$  = 8.3, 1.1 Hz, 1H), 6.60 (dd,  $J$  = 7.7, 1.1 Hz, 1H), 3.57 (s, 3H), 3.56 – 3.45 (m, 2H), 3.35 (d,  $J$  = 14.0 Hz, 1H), 3.16 (s, 3H), 2.80 (d,  $J$  = 14.0 Hz, 1H), 2.61-2.54 (m, 1H), 1.38 (s, 3H), 1.04 (s, 3H), 1.02 (s, 3H).  $^{13}\text{C}$  NMR (101 MHz,  $\text{CDCl}_3$ )  $\delta$  212.1, 181.1, 158.3, 142.8, 135.8, 133.8, 127.5, 127.4, 124.5, 124.1, 122.8, 121.7, 108.6, 107.5, 54.6, 49.1, 45.2, 40.2, 33.3, 26.2, 22.7, 18.5, 18.3. IR (KBr,  $\text{cm}^{-1}$ ): 2968, 2933, 1714, 1614, 1584, 1494, 1471, 1377, 1349, 1301, 1261, 1106, 755. HRMS (ESI): calcd for  $\text{C}_{23}\text{H}_{28}\text{NO}_3$   $[\text{M}+\text{H}]^+$  366.2064, found 366.2058.

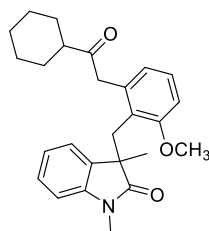

**3-(2-(2-cyclohexyl-2-oxoethyl)-6-methoxybenzyl)-1,3-dimethylindolin-2-one**

**(3ae):** Yellow oil; (92% yield, petroleum ether : ethyl acetate = 3 : 1,  $R_f$  = 0.48).  $^1\text{H NMR}$  (400 MHz,  $\text{CDCl}_3$ )  $\delta$  7.18 (td,  $J$  = 7.7, 1.2 Hz, 1H), 7.09 (t,  $J$  = 7.9 Hz, 1H), 6.88 (td,  $J$  = 7.5, 0.6 Hz, 1H), 6.76 – 6.74 (m, 2H), 6.63 (d,  $J$  = 8.1 Hz, 1H), 6.58 (d,  $J$  = 7.6 Hz, 1H), 3.56 (s, 3H), 3.54 – 3.43 (m, 2H), 3.33 (d,  $J$  = 13.9 Hz, 1H), 3.16 (s, 3H), 2.78 (d,  $J$  = 14.0 Hz, 1H), 2.33 – 2.27 (m, 1H), 1.74 (d,  $J$  = 8.7 Hz, 4H), 1.64 (d,  $J$  = 9.4 Hz, 1H), 1.38 (s, 3H), 1.30 – 1.17 (m, 5H).  $^{13}\text{C NMR}$  (101 MHz,  $\text{CDCl}_3$ )  $\delta$  211.4, 181.1, 158.3, 142.8, 135.8, 133.8, 127.5, 127.4, 124.5, 124.2, 122.9, 121.7, 108.6, 107.5, 54.6, 50.3, 49.1, 45.4, 33.3, 28.8, 28.4, 26.2, 25.8, 25.7, 25.6, 22.8. IR (KBr,  $\text{cm}^{-1}$ ): 2931, 1715, 1613, 1584, 1493, 1471, 1452, 1376, 1349, 1262, 1106, 749. HRMS (ESI): calcd for  $\text{C}_{26}\text{H}_{32}\text{NO}_3$   $[\text{M}+\text{H}]^+$  406.2377, found 406.2372.

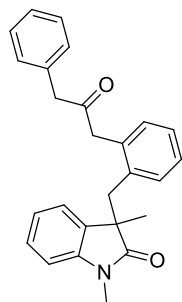

**1,3-dimethyl-3-(2-(2-oxo-3-phenylpropyl)benzyl)indolin-2-one (3af):** Yellow

solid; (89% yield, petroleum ether : ethyl acetate = 3 : 1,  $R_f$  = 0.53), m.p. = 106 – 107 °C.  $^1\text{H NMR}$  (400 MHz,  $\text{CDCl}_3$ )  $\delta$  7.36-7.32 (m, 2H), 7.30-7.27 (m, 1H), 7.18 (d,  $J$  = 7.4 Hz, 3H), 7.05 (td,  $J$  = 7.5, 1.5 Hz, 1H), 7.00 – 6.91 (m, 3H), 6.88 (d,  $J$  = 7.5 Hz, 1H), 6.78 (d,  $J$  = 7.5 Hz, 1H), 6.64 (d,  $J$  = 7.7 Hz, 1H), 3.68 (s, 2H), 3.68 (d,  $J$  = 17.0 Hz, 3H), 3.60 (d,  $J$  = 17.1 Hz, 1H), 2.97 (s, 3H), 2.94 (d,  $J$  = 13.8 Hz, 1H), 2.87 (d,  $J$  = 13.9 Hz, 1H), 1.38 (s, 3H).  $^{13}\text{C NMR}$  (101 MHz,  $\text{CDCl}_3$ )  $\delta$  205.9, 180.1, 143.2, 135.2, 134.2, 133.2, 132.9, 130.8, 130.7, 129.5, 128.8, 128.0, 127.1, 126.9, 126.4, 123.3, 122.1, 107.9, 49.6, 49.5, 46.7, 40.0, 26.0, 23.0. IR (KBr,  $\text{cm}^{-1}$ ): 2967, 1715, 1614, 1495, 1471, 1424, 1380, 1351, 1261, 1247, 1161, 1121, 744. HRMS (ESI): calcd for  $\text{C}_{26}\text{H}_{26}\text{NO}_2$   $[\text{M}+\text{H}]^+$  384.1958, found 384.1954.

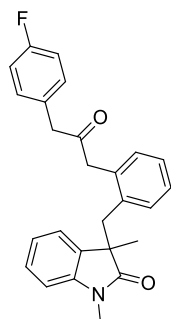

**3-(2-(3-(4-fluorophenyl)-2-oxopropyl)benzyl)-1,3-dimethylindolin-2-one (3ag):**

Yellow oil; (86% yield, petroleum ether : ethyl acetate = 3 : 1,  $R_f$  = 0.42).  $^1\text{H NMR}$  (400 MHz,  $\text{CDCl}_3$ )  $\delta$  7.22-7.18 (m, 1H), 7.14 – 7.10 (m, 2H), 7.07 – 7.02 (m, 2H), 6.99 (dd,  $J$  = 7.1, 4.4 Hz, 3H), 6.94 (td,  $J$  = 7.5, 1.5 Hz, 1H), 6.89 (dd,  $J$  = 7.6, 1.5 Hz, 1H), 6.76 (dd,  $J$  = 7.9, 1.3 Hz, 1H), 6.65 (d,  $J$  = 7.8 Hz, 1H), 3.71 (d,  $J$  = 17.0 Hz, 1H), 3.65 (s, 2H), 3.61 (d,  $J$  = 17.0 Hz, 1H), 2.97 (m,

4H), 2.90 (d,  $J = 13.8$  Hz, 1H), 1.40 (s, 3H).  $^{19}\text{F}$  NMR (376 MHz,  $\text{CDCl}_3$ )  $\delta$  -115.75.  $^{13}\text{C}$  NMR (101 MHz,  $\text{CDCl}_3$ )  $\delta$  205.7, 162.0 (d, C-F,  $^1J_{\text{C-F}} = 245.4$  Hz), 180.07, 143.2, 135.1, 133.1, 132.8, 131.06 (d, C-F,  $^3J_{\text{C-F}} = 8.0$  Hz), 130.95, 130.7, 129.9 (d, C-F,  $^4J_{\text{C-F}} = 3.3$  Hz), 128.0, 126.91, 126.4, 123.3, 122.2, 115.51 (d, C-F,  $^2J_{\text{C-F}} = 21.4$  Hz), 107.9, 49.5, 48.3, 46.8, 40.0, 26.0, 23.0. IR (KBr,  $\text{cm}^{-1}$ ): 2968, 2929, 1717, 1615, 1493, 1471, 1421, 1349, 1227, 1222, 1159, 1100, 744. HRMS (ESI): calcd for  $\text{C}_{26}\text{H}_{25}\text{FNO}_2$   $[\text{M}+\text{H}]^+$  402.1864, found.402.1860.

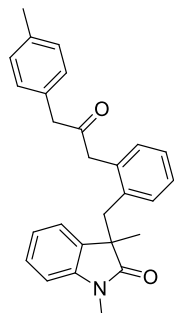

**1,3-dimethyl-3-(2-(2-oxo-3-(p-tolyl)propyl)benzyl)indolin-2-one (3ah):** Yellow oil; (72% yield, petroleum ether : ethyl acetate = 3 : 1,  $R_f = 0.47$ ).  $^1\text{H}$  NMR (400 MHz,  $\text{CDCl}_3$ )  $\delta$  7.19 (td,  $J = 7.7, 1.4$  Hz, 1H), 7.15 (d,  $J = 7.8$  Hz, 2H), 7.07 (d,  $J = 7.9$  Hz, 2H), 7.03 (dd,  $J = 7.5, 1.4$  Hz, 1H), 6.99 – 6.90 (m, 3H), 6.87 (dd,  $J = 7.6, 1.5$  Hz, 1H), 6.78 (dd,  $J = 7.5, 1.3$  Hz, 1H), 6.64 (d,  $J = 7.8$  Hz, 1H), 3.61 (dd,  $J = 26, 16.8$  Hz, 4H), 2.97 (s, 3H), 2.94 (d,  $J = 14.0$  Hz, 1H), 2.86 (d,  $J = 13.9$  Hz, 1H), 2.34 (s, 3H), 1.38 (s, 3H).  $^{13}\text{C}$  NMR (101 MHz,  $\text{CDCl}_3$ )  $\delta$  206.1, 180.1, 143.1, 136.7, 135.1, 133.3, 132.9, 131.1, 130.8, 130.7, 129.5, 129.4, 128.0, 126.8, 126.3, 123.3, 122.1, 107.9, 49.6, 49.1, 46.5, 40.0, 26.0, 22.9, 21.1. IR (KBr,  $\text{cm}^{-1}$ ): 2970, 2926, 1714, 1614, 1494, 1471, 1423, 1379, 1352, 1245, 1159, 1121, 737. HRMS (ESI): calcd for  $\text{C}_{27}\text{H}_{28}\text{NO}_2$   $[\text{M}+\text{H}]^+$  398.2115, found 398.2111.

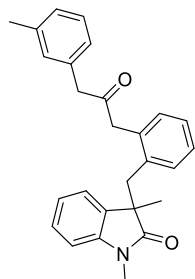

**1,3-dimethyl-3-(2-(2-oxo-3-(m-tolyl)propyl)benzyl)indolin-2-one (3ai):** Yellow oil; (93% yield, petroleum ether : ethyl acetate = 3 : 1,  $R_f = 0.47$ ).  $^1\text{H}$  NMR (400 MHz,  $\text{CDCl}_3$ )  $\delta$  7.25 – 7.21 (m, 1H), 7.18 (dd,  $J = 7.7, 1.3$  Hz, 1H), 7.09 (d,  $J = 7.6$  Hz, 1H), 7.04 (td,  $J = 7.5, 1.3$  Hz, 1H), 7.01 – 6.97 (m, 3H), 6.97 – 6.94 (m, 1H), 6.93 – 6.91 (m, 1H), 6.90 – 6.86 (m, 1H), 6.79 (dd,  $J = 7.7, 1.1$  Hz, 1H), 6.63 (d,  $J = 7.8$  Hz, 1H), 3.67 – 3.57 (m, 4H), 2.97 – 2.84 (m, 4H), 2.86 (d,  $J = 13.9$  Hz, 1H), 2.34 (s, 3H), 1.38 (s, 3H).  $^{13}\text{C}$  NMR (101 MHz,  $\text{CDCl}_3$ )  $\delta$  206.0, 180.0, 143.2, 138.4, 135.2, 134.1, 133.3, 132.9, 130.8, 130.7, 130.3, 128.7, 128.0, 127.8, 126.8, 126.5, 126.3, 123.3, 122.1, 107.9, 49.6, 49.5, 46.6, 40.0, 26.0, 22.9, 21.4. IR (KBr,  $\text{cm}^{-1}$ ): 2967, 2928, 1714, 1614, 1494, 1471, 1379, 1352, 1327, 1120, 739. HRMS (ESI): calcd for  $\text{C}_{27}\text{H}_{28}\text{NO}_2$   $[\text{M}+\text{H}]^+$  398.2115, found 398.2110.

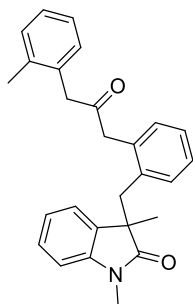

**1,3-dimethyl-3-(2-(2-oxo-3-(o-tolyl)propyl)benzyl)indolin-2-one (3aj):** Yellow oil; (82% yield, petroleum ether : ethyl acetate = 3 : 1,  $R_f$  = 0.48).  $^1\text{H}$  NMR (400 MHz,  $\text{CDCl}_3$ )  $\delta$  7.21 – 7.17 (m, 4H), 7.11 (dd,  $J$  = 6.9, 2.5 Hz, 1H), 7.05 (td,  $J$  = 7.4, 1.4 Hz, 1H), 6.98 (dd,  $J$  = 7.4, 0.8 Hz, 1H), 6.95 (s, 1H), 6.92 (dd,  $J$  = 6.5, 1.2 Hz, 1H), 6.89 (dd,  $J$  = 7.3, 1.4 Hz, 1H), 6.80 (dd,  $J$  = 7.7, 1.1 Hz, 1H), 6.64 (d,  $J$  = 7.8 Hz, 1H), 3.69 (d,  $J$  = 2.2 Hz, 2H), 3.65 – 3.55 (m, 2H), 2.98 – 2.95 (m, 4H), 2.89 (d,  $J$  = 13.9 Hz, 1H), 2.19 (s, 3H), 1.40 (s, 3H).  $^{13}\text{C}$  NMR (101 MHz,  $\text{CDCl}_3$ )  $\delta$  205.9, 180.0, 143.1, 137.0, 135.1, 133.3, 133.1, 132.8, 130.9, 130.6, 130.5, 130.5, 128.0, 127.4, 126.8, 126.4, 126.3, 123.3, 122.1, 107.9, 49.6, 47.6, 46.6, 40.0, 26.0, 22.9, 19.7. IR (KBr,  $\text{cm}^{-1}$ ): 2963, 2927, 1713, 1614, 1494, 1471, 1454, 1380, 1351, 1123, 1058, 1027, 742. HRMS (ESI): calcd for  $\text{C}_{27}\text{H}_{28}\text{NO}_2$   $[\text{M}+\text{H}]^+$  398.2115, found 398.2119.

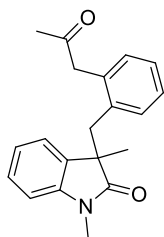

**1,3-dimethyl-3-(2-(2-oxopropyl)benzyl)indolin-2-one (3ak):** Yellow solid; (82% yield, petroleum ether : ethyl acetate = 3 : 1,  $R_f$  = 0.29), m.p. = 65 – 66 °C.  $^1\text{H}$  NMR (400 MHz,  $\text{CDCl}_3$ )  $\delta$  7.23 – 7.19 (m, 1H), 7.09 – 6.99 (m, 3H), 6.96 – 6.93 (m, 2H), 6.80 (dd,  $J$  = 8.1, 1.5 Hz, 1H), 6.67 (d,  $J$  = 7.7 Hz, 1H), 3.65 (d,  $J$  = 16.7 Hz, 1H), 3.57 (d,  $J$  = 16.7 Hz, 1H), 3.10 (d,  $J$  = 13.8 Hz, 1H), 3.03 (d,  $J$  = 13.9 Hz, 1H), 3.00 (s, 3H), 2.08 (s, 3H), 1.46 (s, 3H).  $^{13}\text{C}$  NMR (101 MHz,  $\text{CDCl}_3$ )  $\delta$  206.7, 180.1, 143.2, 135.0, 133.5, 132.9, 131.0, 130.6, 128.0, 127.0, 126.3, 123.4, 122.2, 108.0, 49.6, 48.4, 40.0, 29.5, 26.0, 23.1. IR (KBr,  $\text{cm}^{-1}$ ): 2968, 2928, 1709, 1613, 1494, 1471, 1454, 1379, 1353, 1159, 1121, 1029, 750. HRMS (ESI): calcd for  $\text{C}_{20}\text{H}_{22}\text{NO}_2$   $[\text{M}+\text{H}]^+$  308.1645, found 308.1638.

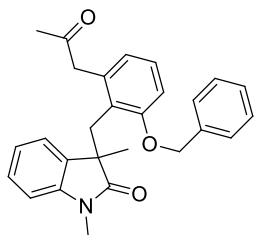

**3-(2-(benzyloxy)-6-(2-oxopropyl)benzyl)-1,3-dimethylindolin-2-one (3al):** Yellow oil; (99% yield, petroleum ether : ethyl acetate = 3 : 1,  $R_f$  = 0.31).  $^1\text{H}$  NMR (400 MHz,  $\text{CDCl}_3$ )  $\delta$  7.39 – 7.35 (m, 2H), 7.34 – 7.30 (m, 3H), 7.14 (t,  $J$  = 7.9 Hz, 2H), 6.79 (td,  $J$  = 7.6, 1.0 Hz, 1H), 6.75 (d,  $J$  = 8.1 Hz, 1H), 6.71 (d,  $J$  = 7.6 Hz, 1H), 6.66 (d,  $J$  = 7.7 Hz, 1H), 6.61 (dd,  $J$  = 7.4, 1.2 Hz, 1H), 4.87 (d,  $J$  = 11.6 Hz, 1H), 4.77 (d,  $J$  = 11.6 Hz, 1H), 3.62 (d,  $J$  = 16.6 Hz, 1H), 3.54 (d,  $J$  = 16.6 Hz, 1H), 3.38 (d,  $J$  = 14.0 Hz, 1H), 3.06 (s, 3H), 3.02 (d,  $J$  = 14.0 Hz, 1H), 2.07 (s, 3H), 1.35 (s, 3H).  $^{13}\text{C}$  NMR (101 MHz,  $\text{CDCl}_3$ )  $\delta$  206.5, 181.0, 157.7, 142.7, 137.1, 135.6, 133.7, 128.5, 127.7, 127.7, 127.5, 127.2, 124.8, 124.1, 123.1, 121.7, 110.1, 107.6, 69.7, 48.9, 48.4, 33.0.

29.5, 26.1, 23.1. IR (KBr,  $\text{cm}^{-1}$ ): 2963, 2930, 1717, 1615, 1493, 1471, 1451, 1377, 1352, 1264, 1158, 1101, 737. HRMS (ESI): calcd for  $\text{C}_{27}\text{H}_{28}\text{NO}_3$   $[\text{M}+\text{H}]^+$  414.2064, found 414.2060.

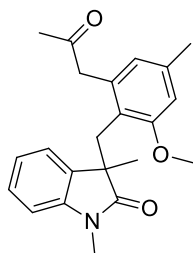

**3-(2-methoxy-4-methyl-6-(2-oxopropyl)benzyl)-1,3-dimethylindolin-2-one**

**(3am):** Yellow oil; (99% yield, petroleum ether : ethyl acetate = 3 : 1,  $R_f$  = 0.31).  $^1\text{H}$  NMR (400 MHz,  $\text{CDCl}_3$ )  $\delta$  7.18 (td,  $J$  = 7.7, 1.1 Hz, 1H), 6.89 (td,  $J$  = 7.5, 1.0 Hz, 1H), 6.78 (dd,  $J$  = 7.3, 1.3 Hz, 1H), 6.75 (d,  $J$  = 7.7 Hz, 1H), 6.46 (d,  $J$  = 3.2 Hz, 2H), 3.57 (s, 3H), 3.42 (dd,  $J$  = 18.84, 16.44 Hz, 2H), 3.32 (d,  $J$  = 14.1 Hz, 1H), 3.16 (s, 3H), 2.84 (d,  $J$  = 14.0 Hz, 1H), 2.26 (s, 3H), 2.02 (s, 3H), 1.36 (s, 3H).  $^{13}\text{C}$  NMR (101 MHz,  $\text{CDCl}_3$ )  $\delta$  206.9, 181.1, 158.3, 142.8, 137.4, 135.2, 133.9, 127.5, 124.1, 123.3, 121.7, 121.3, 109.8, 107.6, 54.6, 49.1, 48.4, 32.9, 29.4, 26.2, 22.8, 21.5. IR (KBr,  $\text{cm}^{-1}$ ): 2963, 2933, 1714, 1613, 1493, 1471, 1377, 1352, 1302, 1159, 1106, 743. HRMS (ESI): calcd for  $\text{C}_{22}\text{H}_{26}\text{NO}_3$   $[\text{M}+\text{H}]^+$  352.1907, found 352.1904.

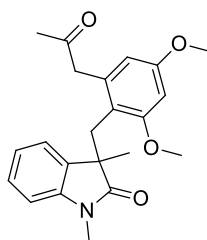

**3-(2,4-dimethoxy-6-(2-oxopropyl)benzyl)-1,3-dimethylindolin-2-one (3an):**

Yellow solid; (99% yield, petroleum ether : ethyl acetate = 3 : 1,  $R_f$  = 0.21), m.p. = 101 - 102 °C.  $^1\text{H}$  NMR (400 MHz,  $\text{CDCl}_3$ )  $\delta$  7.17 (td,  $J$  = 7.7, 1.3 Hz, 1H), 6.89 (td,  $J$  = 7.5, 1.0 Hz, 1H), 6.80 (dd,  $J$  = 7.5, 1.2 Hz, 1H), 6.75 (d,  $J$  = 7.7 Hz, 1H), 6.24 (d,  $J$  = 2.4 Hz, 1H), 6.17 (d,  $J$  = 2.5 Hz, 1H), 3.75 (s, 3H), 3.55 (s, 3H), 3.45 (s, 2H), 3.29 (d,  $J$  = 14.2 Hz, 1H), 3.15 (s, 3H), 2.83 (d,  $J$  = 14.2 Hz, 1H), 2.03 (s, 3H), 1.36 (s, 3H).  $^{13}\text{C}$  NMR (101 MHz,  $\text{CDCl}_3$ )  $\delta$  206.6, 181.1, 159.4, 159.0, 142.8, 136.1, 133.8, 127.5, 124.1, 121.7, 116.9, 107.6, 106.2, 96.9, 55.2, 54.7, 49.3, 48.7, 32.8, 29.4, 26.2, 22.7. IR (KBr,  $\text{cm}^{-1}$ ): 2964, 2937, 1714, 1612, 1494, 1471, 1377, 1351, 1306, 1205, 1150, 741. HRMS (ESI): calcd for  $\text{C}_{22}\text{H}_{26}\text{NO}_4$   $[\text{M}+\text{H}]^+$  368.1856, found 368.1854.

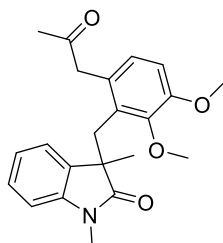

**3-(2,3-dimethoxy-6-(2-oxopropyl)benzyl)-1,3-dimethylindolin-2-one (3ao):**

Yellow oil; (92% yield, petroleum ether : ethyl acetate = 3 : 1,  $R_f$  = 0.21).  $^1\text{H}$  NMR (400 MHz,  $\text{CDCl}_3$ )  $\delta$  7.18 (td,  $J$  = 7.7, 1.3 Hz, 1H), 6.85 (td,  $J$  = 7.5, 1.0 Hz, 1H), 6.79 - 6.75 (m, 2H), 6.72 (d,  $J$  = 8.4 Hz, 1H), 6.70 - 6.66 (m, 1H), 3.83 (s, 3H), 3.77 (s, 3H), 3.31 - 3.20 (m, 5H), 3.08 (d,  $J$  = 16.8 Hz, 1H), 2.76 (d,  $J$  = 13.9 Hz, 1H), 1.96 (s, 3H), 1.37 (s, 3H).  $^{13}\text{C}$  NMR (101 MHz,  $\text{CDCl}_3$ )  $\delta$  206.8, 181.2, 151.5, 148.6, 142.7, 133.4, 129.9, 127.7, 127.5, 125.8, 124.2, 122.1, 111.2, 107.7, 60.2, 55.7, 49.0, 47.8, 33.6, 29.4, 26.3, 23.0. IR (KBr,  $\text{cm}^{-1}$ ): 2968, 2937, 1715, 1612, 1487, 1377, 1349,

1283, 1228, 1158, 1103, 741. HRMS (ESI): calcd for C<sub>22</sub>H<sub>26</sub>NO<sub>4</sub> [M+H]<sup>+</sup> 368.1856, found 368.1853.

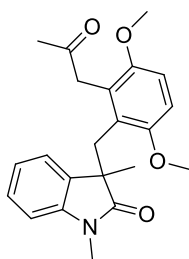

**3-(3,6-dimethoxy-2-(2-oxopropyl)benzyl)-1,3-dimethylindolin-2-one (3ap):** Yellow solid; (98% yield, petroleum ether : ethyl acetate = 3 : 1, R<sub>f</sub> = 0.21), m.p. = 83 - 84 °C. <sup>1</sup>H NMR (400 MHz, CDCl<sub>3</sub>) δ 7.16 (td, *J* = 7.7, 1.3 Hz, 1H), 6.87 (td, *J* = 7.5, 1.0 Hz, 1H), 6.78 (dd, *J* = 7.5, 1.3 Hz, 1H), 6.75 (dd, *J* = 7.9, 0.9 Hz, 1H), 6.67 (d, *J* = 8.9 Hz, 1H), 6.59 (d, *J* = 8.9 Hz, 1H), 3.69 (s, 3H), 3.62 (d, *J* = 17.1 Hz, 1H), 3.53 (s, 3H), 3.38 (d, *J* = 17.1 Hz, 1H), 3.31 (d, *J* = 14.0 Hz, 1H), 3.16 (s, 3H), 2.92 (d, *J* = 14.0 Hz, 1H), 2.05 (s, 3H), 1.36 (s, 3H). <sup>13</sup>C NMR (101 MHz, CDCl<sub>3</sub>) δ 206.9, 181.0, 152.3, 151.5, 142.8, 133.7, 127.5, 125.9, 125.7, 124.1, 121.6, 109.1, 108.5, 107.6, 55.8, 54.8, 48.9, 42.3, 33.4, 29.5, 26.2, 23.1. IR (KBr, cm<sup>-1</sup>): 2965, 2938, 1711, 1614, 1471, 1377, 1353, 1259, 1150, 1106, 741. HRMS (ESI): calcd for C<sub>22</sub>H<sub>26</sub>NO<sub>4</sub> [M+H]<sup>+</sup> 368.1856, found 368.1853.

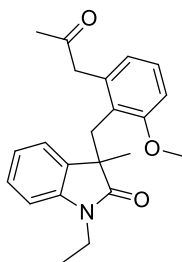

**1-ethyl-3-(2-methoxy-6-(2-oxopropyl)benzyl)-3-methylindolin-2-one (3ba):**

Yellow oil; (95% yield, petroleum ether : ethyl acetate = 3 : 1, R<sub>f</sub> = 0.46). <sup>1</sup>H NMR (400 MHz, CDCl<sub>3</sub>) δ 7.16 (td, *J* = 7.6, 1.4 Hz, 1H), 7.09 (t, *J* = 7.9 Hz, 1H), 6.89 (t, *J* = 7.4 Hz, 1H), 6.82 (d, *J* = 7.1 Hz, 1H), 6.74 (d, *J* = 7.8 Hz, 1H), 6.66 – 6.59 (m, 2H), 3.78 – 3.70 (m, 1H), 3.66 – 3.61 (m, 1H), 3.59 (d, *J* = 6.4 Hz, 1H), 3.51 (s, 3H), 3.47 (d, *J* = 16.6 Hz, 1H), 3.36 (d, *J* = 13.9 Hz, 1H), 2.88 (d, *J* = 13.8 Hz, 1H), 2.04 (s, 3H), 1.39 (s, 3H), 1.11 (t, *J* = 7.2 Hz, 3H). <sup>13</sup>C NMR (101 MHz, CDCl<sub>3</sub>) δ 206.6, 180.5, 158.4, 141.8, 135.7, 134.1, 127.6, 127.4, 124.4, 124.3, 122.7, 121.5, 108.7, 107.6, 54.6, 49.1, 48.6, 34.4, 33.4, 29.5, 22.9, 12.6. IR (KBr, cm<sup>-1</sup>): 2973, 2934, 1705, 1583, 1511, 1489, 1469, 1376, 1358, 1260, 1221, 1106, 743. HRMS (ESI): calcd for C<sub>22</sub>H<sub>26</sub>NO<sub>3</sub> [M+H]<sup>+</sup> 352.1907, found 352.1903.

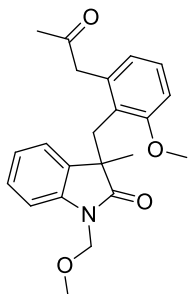

**3-(2-methoxy-6-(2-oxopropyl)benzyl)-1-(methoxymethyl)-3-methylindolin-2-**

**one (3ca):** Yellow oil; (97% yield, petroleum ether : ethyl acetate = 3 : 1, R<sub>f</sub> = 0.45). <sup>1</sup>H NMR (400 MHz, CDCl<sub>3</sub>) δ 7.18 (t, *J* = 7.6 Hz, 1H), 7.10 (t, *J* = 7.9 Hz, 1H), 6.96-6.93 (m, 2H), 6.85 (d, *J* = 7.3 Hz, 1H), 6.63 (dd, *J* = 7.9, 5.1 Hz, 2H), 5.09 (d, *J* = 10.8 Hz, 1H), 5.01 (d, *J* = 10.9 Hz, 1H), 3.63



(d,  $J = 16.6$  Hz, 1H), 3.53 – 3.49 (m, 4H), 3.40 (d,  $J = 13.9$  Hz, 1H), 3.12 (s, 3H), 2.94 (d,  $J = 14.0$  Hz, 1H), 2.06 (s, 3H), 1.44 (s, 3H).  $^{13}\text{C}$  NMR (101 MHz,  $\text{CDCl}_3$ )  $\delta$  206.5, 181.4, 158.4, 140.9, 135.7, 133.4, 127.7, 127.6, 124.3, 124.2, 122.8, 122.2, 109.0, 108.8, 71.2, 55.8, 54.5, 49.6, 48.7, 33.5, 29.5, 23.7. IR (KBr,  $\text{cm}^{-1}$ ): 2935, 1715, 1614, 1488, 1470, 1351, 1261, 1185, 1158, 1112, 1085, 1028, 738. HRMS (ESI): calcd for  $\text{C}_{22}\text{H}_{26}\text{NO}_4$   $[\text{M}+\text{H}]^+$  368.1856, found 368.1853.

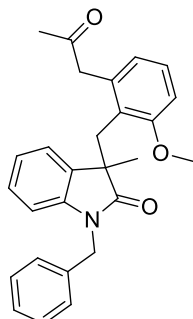

**1-benzyl-3-(2-methoxy-6-(2-oxopropyl)benzyl)-3-methylindolin-2-one (3da):**

Yellow oil; (90% yield, petroleum ether : ethyl acetate = 3 : 1,  $R_f = 0.42$ ).  $^1\text{H}$  NMR (400 MHz,  $\text{CDCl}_3$ )  $\delta$  7.25 – 7.21 (m, 3H), 7.14 (t,  $J = 7.9$  Hz, 1H), 7.07-7.02 (m, 1H), 7.01 – 6.99 (m, 2H), 6.91 – 6.88 (m, 2H), 6.64 (dd,  $J = 13.6, 7.9$  Hz, 2H), 6.56 (d,  $J = 7.7$  Hz, 1H), 5.06 (d,  $J = 15.8$  Hz, 1H), 4.63 (d,  $J = 15.8$  Hz, 1H), 3.74 (d,  $J = 16.8$  Hz, 1H), 3.51 – 3.45 (m, 2H), 3.43 (s, 3H), 2.99 (d,  $J = 13.9$  Hz, 1H), 2.05 (s, 3H), 1.49 (s, 3H).  $^{13}\text{C}$  NMR (101 MHz,  $\text{CDCl}_3$ )  $\delta$  206.7, 180.9, 158.4, 141.9, 135.9, 135.8, 133.9, 128.7, 127.7, 127.4, 127.3, 126.9, 124.5, 124.3, 122.9, 121.7, 108.8, 108.6, 54.5, 49.4, 48.6, 43.4, 33.6, 29.6, 23.7. IR (KBr,  $\text{cm}^{-1}$ ): 2966, 1709, 1611, 1583, 1489, 1469, 1376, 1357, 1260, 1222, 1176, 1108, 754. HRMS (ESI): calcd for  $\text{C}_{27}\text{H}_{28}\text{NO}_3$   $[\text{M}+\text{H}]^+$  414.2064, found 414.2060.

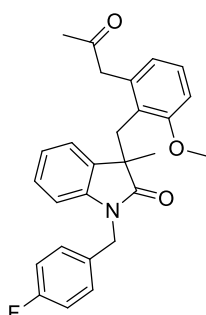

**1-(4-fluorobenzyl)-3-(2-methoxy-6-(2-oxopropyl)benzyl)-3-methylindolin-2-one (3ea):**

Yellow oil; (97% yield, petroleum ether : ethyl acetate = 3 : 1,  $R_f = 0.35$ ).  $^1\text{H}$  NMR (400 MHz,  $\text{CDCl}_3$ )  $\delta$  7.14 (t,  $J = 7.9$  Hz, 1H), 7.05 (td,  $J = 7.4, 1.8$  Hz, 1H), 6.97 – 6.90 (m, 6H), 6.66 (d,  $J = 7.6$  Hz, 1H), 6.60 (d,  $J = 8.2$  Hz, 1H), 6.52 (d,  $J = 7.7$  Hz, 1H), 5.01 (d,  $J = 15.8$  Hz, 1H), 4.55 (d,  $J = 15.8$  Hz, 1H), 3.80 (d,  $J = 16.8$  Hz, 1H), 3.53 – 3.44 (m, 2H), 3.39 (s, 3H), 2.99 (d,  $J = 13.9$  Hz, 1H), 2.06 (s, 3H), 1.49 (s, 3H).  $^{19}\text{F}$  NMR (376 MHz,  $\text{CDCl}_3$ )  $\delta$  -115.16 (s).  $^{13}\text{C}$  NMR (101 MHz,  $\text{CDCl}_3$ )  $\delta$  206.6, 180.8, 162.0 (d, C-F,  $^1J_{\text{C-F}} = 245.4$  Hz), 158.4, 141.6, 135.8, 133.9, 131.6 (d, C-F,  $^4J_{\text{C-F}} = 3.2$  Hz), 128.5 (d, C-F,  $^3J_{\text{C-F}} = 8.1$  Hz), 127.7, 127.4, 124.44, 124.36, 123.0, 121.8, 115.6 (d, C-F,  $^2J_{\text{C-F}} = 21.5$  Hz), 108.8, 108.4, 54.4, 49.5, 48.7, 42.8, 33.6, 29.6, 23.9. IR (KBr,  $\text{cm}^{-1}$ ): 2930, 1710, 1612, 1583, 1511, 1489, 1470, 1377, 1358, 1261, 1178, 1109, 749. HRMS (ESI): calcd for  $\text{C}_{27}\text{H}_{27}\text{FNO}_3$   $[\text{M}+\text{H}]^+$  432.1969, found 432.1963.

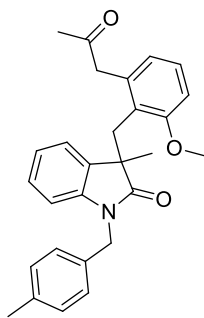

**3-(2-methoxy-6-(2-oxopropyl)benzyl)-3-methyl-1-(4-methylbenzyl)indolin-2-one (3fa):** Yellow oil; (88% yield, petroleum ether : ethyl acetate = 3 : 1,  $R_f$  = 0.44).  $^1\text{H NMR}$  (400 MHz,  $\text{CDCl}_3$ )  $\delta$  7.15 (t,  $J$  = 7.9 Hz, 1H), 7.06 – 7.02 (m, 3H), 6.93 – 6.86 (m, 4H), 6.65 (dd,  $J$  = 10.5, 8.1 Hz, 2H), 6.57 (d,  $J$  = 7.7 Hz, 1H), 5.01 (d,  $J$  = 15.7 Hz, 1H), 4.60 (d,  $J$  = 15.7 Hz, 1H), 3.71 (d,  $J$  = 16.8 Hz, 1H), 3.49 (d,  $J$  = 8.0 Hz, 1H), 3.45 (s, 4H), 2.98 (d,  $J$  = 13.9 Hz, 1H), 2.30 (s, 3H), 2.04 (s, 3H), 1.48 (s, 3H).  $^{13}\text{C NMR}$  (101 MHz,  $\text{CDCl}_3$ )  $\delta$  206.7, 180.9, 158.4, 141.9, 137.0, 135.8, 133.9, 132.9, 129.4, 127.7, 127.4, 126.9, 124.5, 124.2, 122.9, 121.6, 108.8, 108.7, 54.5, 49.4, 48.6, 43.2, 33.5, 29.6, 23.7, 21.1. IR (KBr,  $\text{cm}^{-1}$ ): 2971, 1716, 1614, 1583, 1516, 1488, 1471, 1359, 1261, 1177, 1109, 744. HRMS (ESI): calcd for  $\text{C}_{28}\text{H}_{30}\text{NO}_3$   $[\text{M}+\text{H}]^+$  428.2220, found 428.2216.

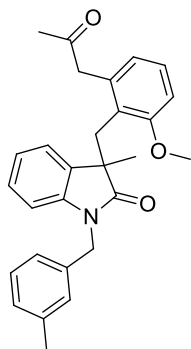

**3-(2-methoxy-6-(2-oxopropyl)benzyl)-3-methyl-1-(3-methylbenzyl)indolin-2-one (3ga):** Yellow oil; (70% yield, petroleum ether : ethyl acetate = 3 : 1,  $R_f$  = 0.44).  $^1\text{H NMR}$  (400 MHz,  $\text{CDCl}_3$ )  $\delta$  7.13 (q,  $J$  = 7.7 Hz, 2H), 7.06 (dd,  $J$  = 7.5, 1.7 Hz, 1H), 7.05 – 7.00 (m, 2H), 6.90 – 6.84 (m, 2H), 6.76 (d,  $J$  = 7.6 Hz, 1H), 6.64 (t,  $J$  = 7.5 Hz, 2H), 6.60 (d,  $J$  = 7.7 Hz, 1H), 4.99 (d,  $J$  = 15.7 Hz, 1H), 4.64 (d,  $J$  = 15.8 Hz, 1H), 3.67 (d,  $J$  = 16.7 Hz, 1H), 3.48 (d,  $J$  = 11.9 Hz, 1H), 3.47 (s, 3H), 3.44 (d,  $J$  = 8.1 Hz, 1H), 2.99 (d,  $J$  = 13.9 Hz, 1H), 2.30 (s, 3H), 2.04 (s, 3H), 1.47 (s, 3H).  $^{13}\text{C NMR}$  (101 MHz,  $\text{CDCl}_3$ )  $\delta$  206.6, 181.0, 158.4, 142.0, 138.3, 136.0, 135.7, 133.8, 128.6, 128.2, 127.7, 127.7, 127.4, 124.5, 124.2, 123.9, 122.8, 121.7, 108.8, 108.7, 54.5, 49.3, 48.6, 43.5, 33.4, 29.5, 23.6, 21.5. IR (KBr,  $\text{cm}^{-1}$ ): 2965, 2928, 1710, 1611, 1583, 1489, 1468, 1379, 1358, 1260, 1177, 1108, 756. HRMS (ESI): calcd for  $\text{C}_{28}\text{H}_{30}\text{NO}_3$   $[\text{M}+\text{H}]^+$  428.2220, found 428.2221.

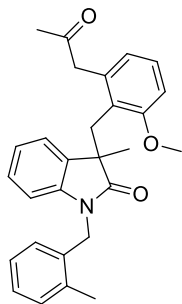

**3-(2-methoxy-6-(2-oxopropyl)benzyl)-3-methyl-1-(2-methylbenzyl)indolin-2-one (3ha):** Yellow oil; (99% yield, petroleum ether : ethyl acetate = 3 : 1,  $R_f$  = 0.36).  $^1\text{H NMR}$  (400 MHz,  $\text{CDCl}_3$ )  $\delta$  7.18-7.11 (m, 3H), 7.04 (td,  $J$  = 7.5, 1.8 Hz, 1H), 7.98 – 6.90 (m, 3H), 6.65 (dd,  $J$

= 7.8, 5.1 Hz, 2H), 6.48 (dd,  $J = 11.6, 7.7$  Hz, 2H), 5.03 (d,  $J = 16.5$  Hz, 1H), 4.62 (d,  $J = 16.5$  Hz, 1H), 3.79 (d,  $J = 16.8$  Hz, 1H), 3.51 (d,  $J = 4.0$  Hz, 1H), 3.47 (s, 4H), 3.04 (d,  $J = 13.9$  Hz, 1H), 2.37 (s, 3H), 2.07 (s, 3H), 1.51 (s, 3H).  $^{13}\text{C}$  NMR (101 MHz,  $\text{CDCl}_3$ )  $\delta$  206.7, 181.0, 158.4, 142.1, 135.8, 135.4, 133.8, 133.3, 130.4, 127.7, 127.4, 127.1, 126.3, 125.6, 124.44, 124.38, 122.9, 121.7, 108.8, 108.7, 54.5, 49.5, 48.7, 41.5, 33.5, 29.6, 23.8, 19.2. IR (KBr,  $\text{cm}^{-1}$ ): 2967, 2930, 1715, 1614, 1489, 1470, 1379, 1324, 1261, 1224, 1177, 1108, 743. HRMS (ESI): calcd for  $\text{C}_{28}\text{H}_{30}\text{NO}_3$   $[\text{M}+\text{H}]^+$  428.2220, found 428.2219.

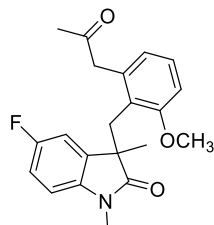

**3-fluoro-3-(2-methoxy-6-(2-oxopropyl)benzyl)-1,3-dimethylindolin-2-one**

**(3ia):** Yellow solid; (86% yield, petroleum ether : ethyl acetate = 3 : 1,  $R_f = 0.26$ ) m.p. = 142 - 143 °C.  $^1\text{H}$  NMR (400 MHz,  $\text{CDCl}_3$ )  $\delta$  7.11 (t,  $J = 7.9$  Hz, 1H), 6.86 (td,  $J = 8.6, 2.6$  Hz, 1H), 6.65 – 6.50 (m, 4H), 3.62 (d,  $J = 1.6$  Hz, 2H), 3.59 (s, 3H), 3.36 (d,  $J = 14.0$  Hz, 1H), 3.11 (s, 3H), 2.97 (d,  $J = 14.0$  Hz, 1H), 2.10 (s, 3H), 1.38 (s, 3H).  $^{19}\text{F}$  NMR (376 MHz,  $\text{CDCl}_3$ )  $\delta$  -122.09.  $^{13}\text{C}$  NMR (101 MHz,  $\text{CDCl}_3$ )  $\delta$  206.4, 180.6, 158.8 (d, C-F,  $^1J_{\text{C-F}} = 238.9$  Hz), 158.1, 138.8 (d, C-F,  $^4J_{\text{C-F}} = 1.9$  Hz), 135.4 (d, C-F,  $^3J_{\text{C-F}} = 8.1$  Hz), 135.4, 127.8, 124.1, 122.9, 113.5 (d, C-F,  $^2J_{\text{C-F}} = 23.5$  Hz), 112.4 (d, C-F,  $^2J_{\text{C-F}} = 25.0$  Hz), 108.7, 107.8 (d, C-F,  $^3J_{\text{C-F}} = 8.1$  Hz), 54.6, 49.7 (d, C-F,  $^4J_{\text{C-F}} = 1.8$  Hz), 48.3, 33.0, 29.5, 26.3, 23.3. IR (KBr,  $\text{cm}^{-1}$ ): 2967, 1710, 1621, 1355, 1277, 1158, 1112, 1073, 1026, 879, 810, 764, 744. HRMS (ESI): calcd for  $\text{C}_{21}\text{H}_{23}\text{FNO}_3$   $[\text{M}+\text{H}]^+$  356.1656, found 356.1655.

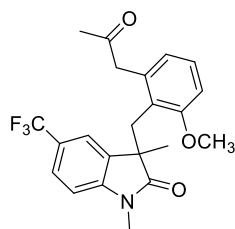

**3-(2-methoxy-6-(2-oxopropyl)benzyl)-1,3-dimethyl-5-(trifluoromethyl)indolin-2-one (3ja):**

Yellow oil; (79% yield, petroleum ether : ethyl acetate = 3 : 1,  $R_f = 0.33$ ).  $^1\text{H}$  NMR (400 MHz,  $\text{CDCl}_3$ )  $\delta$  7.44 (dd,  $J = 8.1, 0.9$  Hz, 1H), 7.18 (d,  $J = 0.9$  Hz, 1H), 7.09 (t,  $J = 8.0$  Hz, 1H), 6.76 (d,  $J = 8.2$  Hz, 1H), 6.63 (d,  $J = 7.7$  Hz, 1H), 6.57 (d,  $J = 8.2$  Hz, 1H), 3.71 – 3.61 (m, 2H), 3.53 (s, 3H), 3.40 (d,  $J = 14.0$  Hz, 1H), 3.13 (s, 3H), 3.02 (d,  $J = 14.0$  Hz, 1H), 2.12 (s, 3H), 1.43 (s, 3H).  $^{19}\text{F}$  NMR (376 MHz,  $\text{CDCl}_3$ )  $\delta$  -61.23.  $^{13}\text{C}$  NMR (101 MHz,  $\text{CDCl}_3$ )  $\delta$  206.3, 180.9, 157.9, 145.8, 135.2, 134.0, 127.9, 125.2 (q, C-F,  $^3J_{\text{C-F}} = 4.0$  Hz), 124.6 (q, C-F,  $^1J_{\text{C-F}} = 271.5$  Hz), 123.8 (q, C-F,  $^2J_{\text{C-F}} = 32.4$  Hz), 123.8, 123.0, 121.4 (q, C-F,  $^3J_{\text{C-F}} = 3.8$  Hz), 108.6, 107.2, 54.5, 49.3, 48.3, 33.1, 29.5, 26.4, 23.4. IR (KBr,  $\text{cm}^{-1}$ ): 2970, 1716, 1623, 1462, 1422, 1377, 1353, 1289, 1259, 1162, 1116, 1063, 738. HRMS (ESI): calcd for  $\text{C}_{22}\text{H}_{23}\text{F}_3\text{NO}_3$   $[\text{M}+\text{H}]^+$  406.1625, found 406.1629.

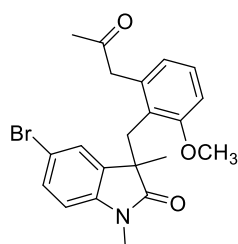

**5-bromo-3-(2-methoxy-6-(2-oxopropyl)benzyl)-1,3-dimethylindolin-2-**

**one (3ka):** Yellow solid; (75% yield, petroleum ether : ethyl acetate = 3 : 1,  $R_f$  = 0.30) m.p.= 143 - 144 °C.  $^1\text{H}$  NMR (400 MHz,  $\text{CDCl}_3$ )  $\delta$  7.27 (dd,  $J$  = 8.4, 2.1 Hz, 1H), 7.10 (t,  $J$  = 8.0 Hz, 1H), 7.05 (d,  $J$  = 2.0 Hz, 1H), 6.66 – 6.62 (m, 1H), 6.61 (d,  $J$  = 8.2 Hz, 1H), 6.57 (d,  $J$  = 8.2 Hz, 1H), 3.67 (s, 2H), 3.59 (s, 3H), 3.36 (d,  $J$  = 14.0 Hz, 1H), 3.08 (s, 3H), 2.98 (d,  $J$  = 14.0 Hz, 1H), 2.12 (s, 3H), 1.39 (s, 3H).  $^{13}\text{C}$  NMR (101 MHz,  $\text{CDCl}_3$ )  $\delta$  206.4, 180.3, 158.0, 141.9, 135.6, 135.3, 130.2, 127.8, 127.7, 123.9, 122.9, 114.3, 108.9, 108.6, 54.7, 49.6, 48.3, 33.1, 29.6, 26.3, 23.3. IR (KBr,  $\text{cm}^{-1}$ ): 2974, 2902, 1708, 1607, 1489, 1467, 1377, 1256, 1077, 1050, 913, 742, 534. HRMS (ESI): calcd for  $\text{C}_{21}\text{H}_{23}\text{BrNO}_3$   $[\text{M}+\text{H}]^+$  416.0856, found 416.0857.

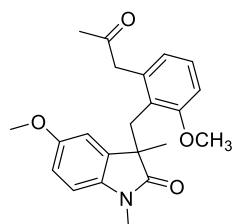

**5-methoxy-3-(2-methoxy-6-(2-oxopropyl)benzyl)-1,3-dimethylindolin-2-one (3la):**

Yellow oil; (81.1% yield, petroleum ether : ethyl acetate = 3 : 1,  $R_f$  = 0.17).  $^1\text{H}$  NMR (400 MHz,  $\text{CDCl}_3$ )  $\delta$  7.12 (t,  $J$  = 7.9 Hz, 1H), 6.71 (dd,  $J$  = 8.4, 2.5 Hz, 1H), 6.66 (td,  $J$  = 8.3, 5.6 Hz, 3H), 6.37 (d,  $J$  = 2.5 Hz, 1H), 3.66 (s, 3H), 3.61 (s, 3H), 3.49 (dd,  $J$  = 24.2, 16.6 Hz, 2H), 3.36 (d,  $J$  = 14.0 Hz, 1H), 3.14 (s, 3H), 2.89 (d,  $J$  = 14.0 Hz, 1H), 2.04 (s, 3H), 1.36 (s, 3H).  $^{13}\text{C}$  NMR (101 MHz,  $\text{CDCl}_3$ )  $\delta$  206.5, 180.7, 158.4, 155.4, 136.4, 135.6, 135.0, 127.7, 124.4, 122.7, 112.1, 111.5, 108.8, 107.7, 55.7, 54.7, 49.5, 48.4, 33.0, 29.5, 26.3, 23.1. IR (KBr,  $\text{cm}^{-1}$ ): 2931, 1705, 1600, 1497, 1471, 1357, 1289, 1159, 1113, 1075, 1038, 912, 741. HRMS (ESI): calcd for  $\text{C}_{22}\text{H}_{26}\text{NO}_4$   $[\text{M}+\text{H}]^+$  368.1856, found 368.1859.

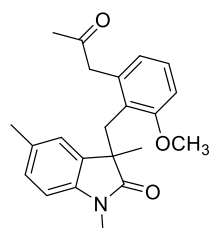

**3-(2-methoxy-6-(2-oxopropyl)benzyl)-1,3,5-trimethylindolin-2-one (3ma):**

white solid; (91% yield, petroleum ether : ethyl acetate = 3 : 1,  $R_f$  = 0.28) m.p.= 125 - 126 °C.  $^1\text{H}$  NMR (400 MHz,  $\text{CDCl}_3$ )  $\delta$  7.12 (t,  $J$  = 7.9 Hz, 1H), 6.97 (dd,  $J$  = 7.8, 0.9 Hz, 1H), 6.66 (s, 1H), 6.65 – 6.61 (m, 2H), 6.58 (d,  $J$  = 1.1 Hz, 1H), 3.59 (s, 3H), 3.49 (s, 2H), 3.36 (d,  $J$  = 13.9 Hz, 1H), 3.13 (s, 3H), 2.89 (d,  $J$  = 13.9 Hz, 1H), 2.23 (s, 3H), 2.04 (s, 3H), 1.36 (s, 3H).  $^{13}\text{C}$  NMR (101 MHz,  $\text{CDCl}_3$ )  $\delta$  206.5, 180.9, 158.4, 140.4, 135.6, 133.7, 131.0, 127.7, 127.6, 125.1, 124.5, 122.6, 108.6, 107.2, 54.6, 49.2, 48.3, 33.1, 29.5, 26.2, 22.9, 21.1. IR (KBr,  $\text{cm}^{-1}$ ): 2965, 2935, 1705, 1603, 1499, 1469, 1354, 1264, 1112, 1056, 913, 747. HRMS (ESI): calcd for  $\text{C}_{22}\text{H}_{26}\text{NO}_3$   $[\text{M}+\text{H}]^+$  352.1907, found.352.1910.

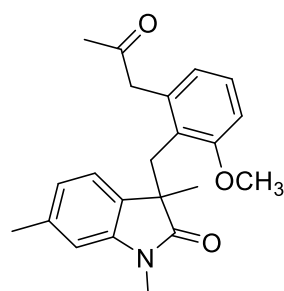

**3-(2-methoxy-6-(2-oxopropyl)benzyl)-1,3,6-trimethylindolin-2-**

**one(3na):** Yellow oil; (75.2% yield, petroleum ether : ethyl acetate = 3 : 1,  $R_f = 0.22$ ).  $^1\text{H NMR}$  (400 MHz,  $\text{CDCl}_3$ )  $\delta$  7.12 (t,  $J = 7.9$  Hz, 1H), 6.71 – 6.60 (m, 4H), 6.58 (s, 1H), 3.62 (s, 3H), 3.51 – 3.40 (m, 2H), 3.36 (d,  $J = 13.9$  Hz, 1H), 3.14 (s, 3H), 2.86 (d,  $J = 13.9$  Hz, 1H), 2.32 (s, 3H), 2.02 (s, 3H), 1.35 (s, 3H).  $^{13}\text{C NMR}$  (101 MHz,  $\text{CDCl}_3$ )  $\delta$  206.72, 181.34, 158.42, 142.81, 137.56, 135.55, 130.67, 127.6, 124.5, 123.8, 122.7, 122.2, 108.8, 108.6, 54.7, 48.9, 48.4, 33.0, 29.5, 26.2, 23.1, 21.8. IR (KBr,  $\text{cm}^{-1}$ ): 2929, 1710, 1621, 1470, 1584, 1380, 1262, 1106, 812, 530. HRMS (ESI): calcd for  $\text{C}_{22}\text{H}_{25}\text{NNaO}_3$   $[\text{M}+\text{Na}]^+$  374.1727, found 374.1730.

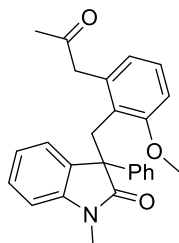

**3-(2-methoxy-6-(2-oxopropyl)benzyl)-1-methyl-3-phenylindolin-2-one (3oa):**

Yellow oil; (99% yield, petroleum ether : ethyl acetate = 3 : 1,  $R_f = 0.34$ ).  $^1\text{H NMR}$  (400 MHz,  $\text{CDCl}_3$ )  $\delta$  7.51 (d,  $J = 7.4$  Hz, 2H), 7.32 – 7.21 (m, 3H), 7.20 – 7.14 (m, 1H), 7.03 (t,  $J = 7.9$  Hz, 1H), 6.90 (q,  $J = 7.5$  Hz, 2H), 6.70 (d,  $J = 7.8$  Hz, 1H), 6.57 (d,  $J = 7.6$  Hz, 1H), 6.46 (d,  $J = 8.2$  Hz, 1H), 3.81 (d,  $J = 13.9$  Hz, 1H), 3.59 (dd,  $J = 15.4, 11.6$  Hz, 2H), 3.48 (d,  $J = 16.9$  Hz, 1H), 3.32 (s, 3H), 3.09 (s, 3H), 2.03 (s, 3H).  $^{13}\text{C NMR}$  (101 MHz,  $\text{CDCl}_3$ )  $\delta$  206.4, 178.8, 158.1, 143.6, 140.8, 135.2, 130.7, 128.3, 127.8, 127.6, 127.4, 127.2, 126.9, 124.6, 122.7, 121.3, 108.3, 107.6, 56.8, 54.3, 48.2, 34.9, 29.5, 26.4. IR (KBr,  $\text{cm}^{-1}$ ): 2969, 1706, 1611, 1494, 1471, 1374, 1354, 1260, 1157, 1131, 1095, 753. HRMS (ESI): calcd for  $\text{C}_{26}\text{H}_{26}\text{NO}_3$   $[\text{M}+\text{H}]^+$  400.1907, found 400.1910.

### 3. Gram-Scale Reaction

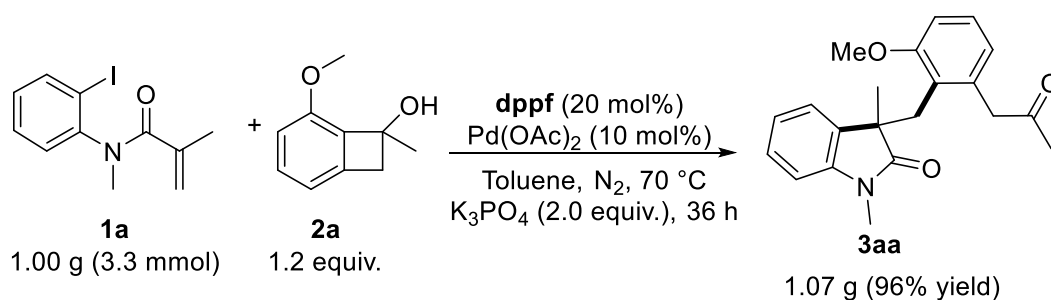

To a 100 mL Schlenk tube, **1** (1.00g, 3.32 mmol), **2** (654 mg, 3.99 mmol),  $\text{K}_3\text{PO}_4$  (1.41 g, 2.0 equiv),  $\text{Pd}(\text{OAc})_2$  (74.54 mg, 10 mol %), **dppf** (368.10 mg, 20.0 mol%), and toluene (33 mL) were added sequentially under a  $\text{N}_2$  atmosphere. The reaction mixture was stirred at 70 °C for 36 h. After the reaction was complete (monitored by TLC), The reaction mixture was concentrated under reduced pressure. The residue was purified by column chromatography on silica gel to furnish 1.07 g (95% yield) of the **3aa**.

#### 4. Primitive Results of Enantioselective Reaction

Table S1. Optimization of enantioselective reaction<sup>a</sup>

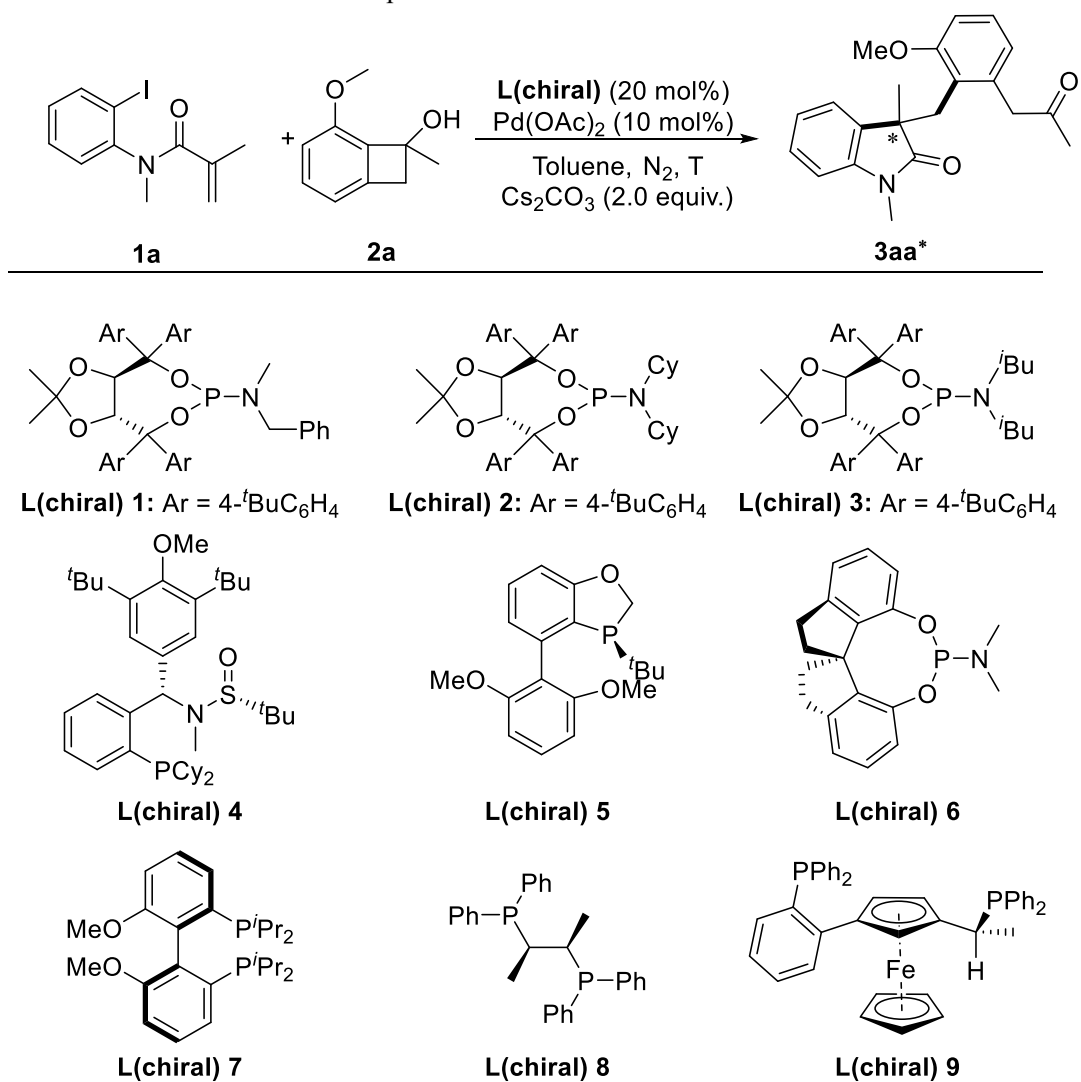

| Entry | L(chiral) | T (°C) | Yield (%) <sup>b</sup> | ee (%) <sup>c</sup> |
|-------|-----------|--------|------------------------|---------------------|
| 1     | <b>1</b>  | 80     | 29                     | 33                  |
| 2     | <b>2</b>  | 80     | 15                     | 4                   |
| 3     | <b>3</b>  | 80     | 18                     | 14                  |
| 4     | <b>4</b>  | 80     | 52                     | 29                  |
| 5     | <b>5</b>  | 80     | 83                     | 10                  |
| 6     | <b>6</b>  | 80     | 80                     | 12                  |
| 7     | <b>7</b>  | 80     | 19                     | 36                  |
| 8     | <b>8</b>  | 80     | 89                     | 1                   |
| 9     | <b>9</b>  | 80     | 49                     | 6                   |
| 10    | <b>1</b>  | 60     | 49                     | 41                  |
| 11    | <b>1</b>  | 40     | 29                     | 38                  |

<sup>a</sup>Reaction conditions, unless otherwise noted: **1a** (0.1 mmol), **2a** (0.12 mmol), L(Chiral) (20 mol%),  $\text{Pd}(\text{OAc})_2$  (10 mol%),  $\text{Cs}_2\text{CO}_3$  (2.0 equiv.) and 1 mL toluene under  $\text{N}_2$  for 13 h. <sup>b</sup>Isolated yield. <sup>c</sup> Determined by HPLC analysis using a chiral stationary phase.

To a 10 mL Schlenk tube, **1a** (0.1 mmol), **2a** (0.12 mmol),  $\text{Cs}_2\text{CO}_3$  (0.2 mmol, 2.0 equiv.),

Pd(OAc)<sub>2</sub> (0.01 mmol, 10 mol%), **L(chiral)** (0.02 mmol, 20.0 mol%), and toluene (1.0 mL) were added sequentially under a N<sub>2</sub> atmosphere. The reaction mixture was stirred at 80 °C (entry 10 at 60 °C and entry 10 at 40 °C) for 13 h. The resulting mixture was filtered with ethyl acetate and concentrated, then the residue was purified by preparative TLC (petroleum ether : ethyl acetate = 3 : 1) directly and delivered the desired product. (49% yield, 41% ee (determined by HPLC analysis [Daicel CHIRALPAK OD-H column, *n*-hexane/*i*-PrOH = 90/10, 1.0 mL/min, λ = 254 nm, t (major) = 13.8 min, t (minor) = 17.0 min]).

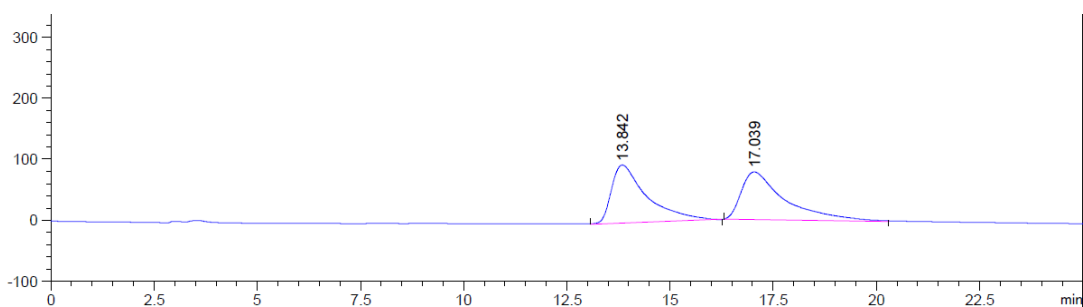

| Peak # | RetTime [min] | Type | Width [min] | Area [mAU*s] | Height [mAU] | Area %  |
|--------|---------------|------|-------------|--------------|--------------|---------|
| 1      | 13.842        | MM   | 0.9956      | 5706.30371   | 95.52834     | 49.8650 |
| 2      | 17.039        | MM   | 1.2234      | 5737.19141   | 78.16105     | 50.1350 |

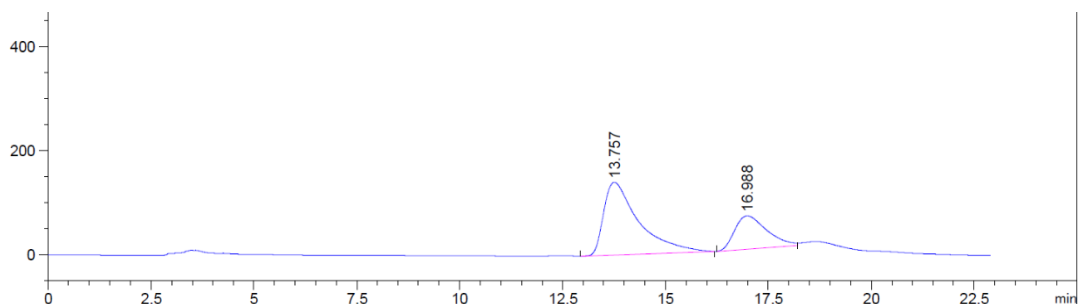

| Peak # | RetTime [min] | Type | Width [min] | Area [mAU*s] | Height [mAU] | Area %  |
|--------|---------------|------|-------------|--------------|--------------|---------|
| 1      | 13.757        | MM   | 0.9847      | 8255.93945   | 139.74226    | 70.4617 |
| 2      | 16.988        | MM   | 0.9031      | 3460.97192   | 63.87343     | 29.5383 |

## 5. X-Ray Crystal Structure of Enantiopure **3aa**

The crystal of **3aa** (CCDC 2120493) suitable for X-ray analysis was prepared by slow evaporation of the solvent of the solution of **3aa** in *n*-hexane/acetone at room temperature (Figure S1).

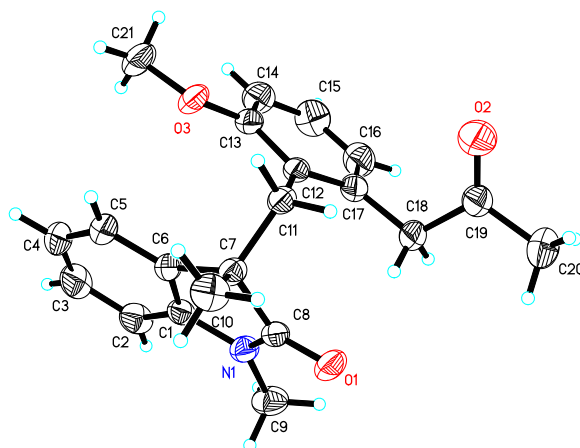

**Figure S1.** X-ray crystal structure of **3aa**

**Table S2.** Crystal data and structure refinement for **3aa**

|                                   |                                                 |                              |
|-----------------------------------|-------------------------------------------------|------------------------------|
| Identification code               | <b>3aa</b>                                      |                              |
| Empirical formula                 | C <sub>21</sub> H <sub>23</sub> NO <sub>3</sub> |                              |
| Formula weight                    | 337.40                                          |                              |
| Temperature                       | 294(2) K                                        |                              |
| Wavelength                        | 0.71073 Å                                       |                              |
| Crystal system                    | Monoclinic                                      |                              |
| Space group                       | P 21                                            |                              |
| Unit cell dimensions              | a = 8.2614(3) Å                                 | $\alpha = 90^\circ$          |
|                                   | b = 13.2824(5) Å                                | $\beta = 110.0190(10)^\circ$ |
|                                   | c = 8.9573(3) Å                                 | $\gamma = 90^\circ$          |
| Volume                            | 923.51(6) Å <sup>3</sup>                        |                              |
| Z                                 | 2                                               |                              |
| Density (calculated)              | 1.213 Mg/m <sup>3</sup>                         |                              |
| Absorption coefficient            | 0.081 mm <sup>-1</sup>                          |                              |
| F(000)                            | 360                                             |                              |
| Crystal size                      | 0.170 x 0.150 x 0.120 mm <sup>3</sup>           |                              |
| Theta range for data collection   | 2.624 to 25.996°                                |                              |
| Index ranges                      | -10 ≤ h ≤ 10, -16 ≤ k ≤ 16, -11 ≤ l ≤ 11        |                              |
| Reflections collected             | 8924                                            |                              |
| Independent reflections           | 3570 [R(int) = 0.0249]                          |                              |
| Completeness to theta = 25.242°   | 99.0 %                                          |                              |
| Absorption correction             | Semi-empirical from equivalents                 |                              |
| Max. and min. transmission        | 0.7456 and 0.6986                               |                              |
| Refinement method                 | Full-matrix least-squares on F <sup>2</sup>     |                              |
| Data / restraints / parameters    | 3570 / 1 / 231                                  |                              |
| Goodness-of-fit on F <sup>2</sup> | 1.032                                           |                              |
| Final R indices [I > 2σ(I)]       | R1 = 0.0378, wR2 = 0.0959                       |                              |



|                              |                                    |
|------------------------------|------------------------------------|
| R indices (all data)         | R1 = 0.0460, wR2 = 0.1035          |
| Absolute structure parameter | -0.1(5)                            |
| Extinction coefficient       | 0.12(3)                            |
| Largest diff. peak and hole  | 0.148 and -0.115 e.Å <sup>-3</sup> |

**Table S3.** Atomic coordinates ( $\times 10^4$ ) and equivalent isotropic displacement parameters ( $\text{\AA}^2 \times 10^3$ ) **3aa**.

U(eq) is defined as one third of the trace of the orthogonalized  $U^{\text{ij}}$  tensor.

| Atom  | x        | y       | z        | U(eq)  |
|-------|----------|---------|----------|--------|
| O(1)  | 5587(2)  | 4326(2) | 7803(2)  | 70(1)  |
| O(2)  | 768(3)   | 6536(4) | 7867(3)  | 120(1) |
| O(3)  | -277(2)  | 4657(2) | 2401(2)  | 64(1)  |
| N(1)  | 5844(2)  | 4622(2) | 5383(2)  | 50(1)  |
| C(1)  | 4974(3)  | 4316(2) | 3806(3)  | 49(1)  |
| C(2)  | 5482(4)  | 4451(3) | 2505(3)  | 66(1)  |
| C(3)  | 4465(5)  | 4010(3) | 1090(3)  | 79(1)  |
| C(4)  | 3049(5)  | 3455(3) | 1007(3)  | 75(1)  |
| C(5)  | 2540(4)  | 3327(2) | 2328(3)  | 63(1)  |
| C(6)  | 3511(3)  | 3779(2) | 3730(3)  | 47(1)  |
| C(7)  | 3342(3)  | 3770(2) | 5355(3)  | 48(1)  |
| C(8)  | 5032(3)  | 4259(2) | 6359(3)  | 49(1)  |
| C(9)  | 7494(4)  | 5136(3) | 5955(4)  | 73(1)  |
| C(10) | 3219(4)  | 2713(3) | 5979(4)  | 71(1)  |
| C(11) | 1809(3)  | 4422(2) | 5470(3)  | 50(1)  |
| C(12) | 1551(3)  | 5444(2) | 4698(3)  | 48(1)  |
| C(13) | 507(3)   | 5527(2) | 3093(3)  | 53(1)  |
| C(14) | 260(4)   | 6436(3) | 2290(4)  | 72(1)  |
| C(15) | 1011(6)  | 7288(3) | 3086(5)  | 86(1)  |
| C(16) | 1966(5)  | 7244(3) | 4658(5)  | 78(1)  |
| C(17) | 2267(3)  | 6331(2) | 5488(3)  | 59(1)  |
| C(18) | 3301(4)  | 6368(3) | 7231(4)  | 70(1)  |
| C(19) | 2306(4)  | 6549(2) | 8327(4)  | 65(1)  |
| C(20) | 3353(5)  | 6722(3) | 10039(4) | 83(1)  |
| C(21) | -1131(4) | 4648(4) | 724(3)   | 87(1)  |

**Table S4.** Bond lengths [ $\text{\AA}$ ] and angles [ $^\circ$ ] for **3aa**.

|              |          |
|--------------|----------|
| O(1)-C(8)    | 1.218(3) |
| O(2)-C(19)   | 1.194(4) |
| O(3)-C(13)   | 1.366(4) |
| O(3)-C(21)   | 1.424(3) |
| N(1)-C(8)    | 1.360(3) |
| N(1)-C(1)    | 1.408(3) |
| N(1)-C(9)    | 1.452(4) |
| C(1)-C(2)    | 1.378(4) |
| C(1)-C(6)    | 1.386(4) |
| C(2)-C(3)    | 1.388(5) |
| C(2)-H(2)    | 0.9300   |
| C(3)-C(4)    | 1.363(5) |
| C(3)-H(3)    | 0.9300   |
| C(4)-C(5)    | 1.395(4) |
| C(4)-H(4)    | 0.9300   |
| C(5)-C(6)    | 1.375(4) |
| C(5)-H(5)    | 0.9300   |
| C(6)-C(7)    | 1.510(3) |
| C(7)-C(8)    | 1.523(3) |
| C(7)-C(10)   | 1.528(4) |
| C(7)-C(11)   | 1.567(4) |
| C(9)-H(9A)   | 0.9600   |
| C(9)-H(9B)   | 0.9600   |
| C(9)-H(9C)   | 0.9600   |
| C(10)-H(10A) | 0.9600   |

---

|                  |            |
|------------------|------------|
| C(10)-H(10B)     | 0.9600     |
| C(10)-H(10C)     | 0.9600     |
| C(11)-C(12)      | 1.505(4)   |
| C(11)-H(11A)     | 0.9700     |
| C(11)-H(11B)     | 0.9700     |
| C(12)-C(17)      | 1.397(4)   |
| C(12)-C(13)      | 1.405(3)   |
| C(13)-C(14)      | 1.384(4)   |
| C(14)-C(15)      | 1.369(6)   |
| C(14)-H(14)      | 0.9300     |
| C(15)-C(16)      | 1.359(5)   |
| C(15)-H(15)      | 0.9300     |
| C(16)-C(17)      | 1.400(5)   |
| C(16)-H(16)      | 0.9300     |
| C(17)-C(18)      | 1.501(4)   |
| C(18)-C(19)      | 1.500(4)   |
| C(18)-H(18A)     | 0.9700     |
| C(18)-H(18B)     | 0.9700     |
| C(19)-C(20)      | 1.498(4)   |
| C(20)-H(20A)     | 0.9600     |
| C(20)-H(20B)     | 0.9600     |
| C(20)-H(20C)     | 0.9600     |
| C(21)-H(21A)     | 0.9600     |
| C(21)-H(21B)     | 0.9600     |
| C(21)-H(21C)     | 0.9600     |
| C(13)-O(3)-C(21) | 118.2(3)   |
| C(8)-N(1)-C(1)   | 110.4(2)   |
| C(8)-N(1)-C(9)   | 123.3(2)   |
| C(1)-N(1)-C(9)   | 125.8(2)   |
| C(2)-C(1)-C(6)   | 122.5(2)   |
| C(2)-C(1)-N(1)   | 127.8(3)   |
| C(6)-C(1)-N(1)   | 109.58(19) |
| C(1)-C(2)-C(3)   | 116.9(3)   |
| C(1)-C(2)-H(2)   | 121.5      |
| C(3)-C(2)-H(2)   | 121.5      |
| C(4)-C(3)-C(2)   | 121.2(3)   |
| C(4)-C(3)-H(3)   | 119.4      |
| C(2)-C(3)-H(3)   | 119.4      |
| C(3)-C(4)-C(5)   | 121.5(3)   |
| C(3)-C(4)-H(4)   | 119.3      |
| C(5)-C(4)-H(4)   | 119.3      |
| C(6)-C(5)-C(4)   | 118.0(3)   |
| C(6)-C(5)-H(5)   | 121.0      |
| C(4)-C(5)-H(5)   | 121.0      |
| C(5)-C(6)-C(1)   | 119.8(2)   |
| C(5)-C(6)-C(7)   | 131.3(2)   |
| C(1)-C(6)-C(7)   | 108.9(2)   |
| C(6)-C(7)-C(8)   | 101.4(2)   |
| C(6)-C(7)-C(10)  | 113.5(2)   |
| C(8)-C(7)-C(10)  | 109.8(2)   |
| C(6)-C(7)-C(11)  | 113.7(2)   |
| C(8)-C(7)-C(11)  | 108.9(2)   |
| C(10)-C(7)-C(11) | 109.2(2)   |
| O(1)-C(8)-N(1)   | 124.6(2)   |
| O(1)-C(8)-C(7)   | 126.4(2)   |
| N(1)-C(8)-C(7)   | 109.02(19) |
| N(1)-C(9)-H(9A)  | 109.5      |
| N(1)-C(9)-H(9B)  | 109.5      |
| H(9A)-C(9)-H(9B) | 109.5      |
| N(1)-C(9)-H(9C)  | 109.5      |

|                     |            |
|---------------------|------------|
| H(9A)-C(9)-H(9C)    | 109.5      |
| H(9B)-C(9)-H(9C)    | 109.5      |
| C(7)-C(10)-H(10A)   | 109.5      |
| C(7)-C(10)-H(10B)   | 109.5      |
| H(10A)-C(10)-H(10B) | 109.5      |
| C(7)-C(10)-H(10C)   | 109.5      |
| H(10A)-C(10)-H(10C) | 109.5      |
| H(10B)-C(10)-H(10C) | 109.5      |
| C(12)-C(11)-C(7)    | 117.31(19) |
| C(12)-C(11)-H(11A)  | 108.0      |
| C(7)-C(11)-H(11A)   | 108.0      |
| C(12)-C(11)-H(11B)  | 108.0      |
| C(7)-C(11)-H(11B)   | 108.0      |
| H(11A)-C(11)-H(11B) | 107.2      |
| C(17)-C(12)-C(13)   | 117.3(3)   |
| C(17)-C(12)-C(11)   | 124.0(2)   |
| C(13)-C(12)-C(11)   | 118.8(2)   |
| O(3)-C(13)-C(14)    | 122.6(2)   |
| O(3)-C(13)-C(12)    | 115.4(2)   |
| C(14)-C(13)-C(12)   | 122.0(3)   |
| C(15)-C(14)-C(13)   | 119.4(3)   |
| C(15)-C(14)-H(14)   | 120.3      |
| C(13)-C(14)-H(14)   | 120.3      |
| C(16)-C(15)-C(14)   | 120.2(4)   |
| C(16)-C(15)-H(15)   | 119.9      |
| C(14)-C(15)-H(15)   | 119.9      |
| C(15)-C(16)-C(17)   | 121.5(3)   |
| C(15)-C(16)-H(16)   | 119.3      |
| C(17)-C(16)-H(16)   | 119.3      |
| C(12)-C(17)-C(16)   | 119.6(3)   |
| C(12)-C(17)-C(18)   | 123.1(3)   |
| C(16)-C(17)-C(18)   | 117.3(3)   |
| C(19)-C(18)-C(17)   | 116.2(2)   |
| C(19)-C(18)-H(18A)  | 108.2      |
| C(17)-C(18)-H(18A)  | 108.2      |
| C(19)-C(18)-H(18B)  | 108.2      |
| C(17)-C(18)-H(18B)  | 108.2      |
| H(18A)-C(18)-H(18B) | 107.4      |
| O(2)-C(19)-C(20)    | 121.9(3)   |
| O(2)-C(19)-C(18)    | 121.9(3)   |
| C(20)-C(19)-C(18)   | 116.2(3)   |
| C(19)-C(20)-H(20A)  | 109.5      |
| C(19)-C(20)-H(20B)  | 109.5      |
| H(20A)-C(20)-H(20B) | 109.5      |
| C(19)-C(20)-H(20C)  | 109.5      |
| H(20A)-C(20)-H(20C) | 109.5      |
| H(20B)-C(20)-H(20C) | 109.5      |
| O(3)-C(21)-H(21A)   | 109.5      |
| O(3)-C(21)-H(21B)   | 109.5      |
| H(21A)-C(21)-H(21B) | 109.5      |
| O(3)-C(21)-H(21C)   | 109.5      |
| H(21A)-C(21)-H(21C) | 109.5      |
| H(21B)-C(21)-H(21C) | 109.5      |

**Symmetry transformations used to generate equivalent atoms:**

**Table S5.** Anisotropic displacement parameters ( $\text{\AA}^2 \times 10^3$ ) for **3aa**.

**The anisotropic displacement factor exponent takes the form:  $-2p^2[ h^2 a^{*2}U^{11} + \dots + 2 h k a^* b^* U^{12} ]$**

| Atom | U <sup>11</sup> | U <sup>22</sup> | U <sup>33</sup> | U <sup>23</sup> | U <sup>13</sup> | U <sup>12</sup> |
|------|-----------------|-----------------|-----------------|-----------------|-----------------|-----------------|
| O(1) | 56(1)           | 111(2)          | 38(1)           | -5(1)           | 6(1)            | 5(1)            |

|       |       |        |       |        |       |        |
|-------|-------|--------|-------|--------|-------|--------|
| O(2)  | 64(2) | 205(4) | 96(2) | -34(2) | 34(1) | -7(2)  |
| O(3)  | 50(1) | 83(1)  | 46(1) | -11(1) | 1(1)  | -8(1)  |
| N(1)  | 41(1) | 58(1)  | 49(1) | -1(1)  | 13(1) | -2(1)  |
| C(1)  | 48(1) | 56(1)  | 44(1) | 6(1)   | 17(1) | 12(1)  |
| C(2)  | 67(2) | 82(2)  | 60(2) | 14(2)  | 34(1) | 12(2)  |
| C(3)  | 95(3) | 105(3) | 45(2) | 9(2)   | 35(2) | 26(2)  |
| C(4)  | 79(2) | 97(3)  | 44(2) | -16(2) | 13(1) | 16(2)  |
| C(5)  | 56(2) | 76(2)  | 51(2) | -15(1) | 12(1) | 0(1)   |
| C(6)  | 45(1) | 58(2)  | 40(1) | -3(1)  | 15(1) | 4(1)   |
| C(7)  | 42(1) | 62(2)  | 38(1) | 0(1)   | 12(1) | -2(1)  |
| C(8)  | 39(1) | 65(2)  | 41(1) | -1(1)  | 10(1) | 8(1)   |
| C(9)  | 49(2) | 74(2)  | 89(2) | 1(2)   | 15(2) | -9(1)  |
| C(10) | 72(2) | 73(2)  | 71(2) | 11(2)  | 28(2) | 1(2)   |
| C(11) | 38(1) | 74(2)  | 40(1) | -5(1)  | 16(1) | -6(1)  |
| C(12) | 34(1) | 70(2)  | 44(1) | -7(1)  | 17(1) | -1(1)  |
| C(13) | 39(1) | 69(2)  | 49(1) | -5(1)  | 14(1) | 1(1)   |
| C(14) | 73(2) | 84(2)  | 59(2) | 9(2)   | 21(2) | 10(2)  |
| C(15) | 98(3) | 72(2)  | 90(2) | 9(2)   | 35(2) | 3(2)   |
| C(16) | 75(2) | 66(2)  | 98(3) | -19(2) | 34(2) | -12(2) |
| C(17) | 43(1) | 73(2)  | 63(2) | -19(2) | 21(1) | -6(1)  |
| C(18) | 50(2) | 88(2)  | 67(2) | -32(2) | 16(1) | -7(2)  |
| C(19) | 58(2) | 68(2)  | 68(2) | -16(2) | 20(1) | -5(1)  |
| C(20) | 97(3) | 93(2)  | 61(2) | -9(2)  | 29(2) | -7(2)  |
| C(21) | 68(2) | 127(3) | 49(2) | -18(2) | -1(1) | -4(2)  |

**Table S6.** Hydrogen coordinates ( $\times 10^4$ ) and isotropic displacement parameters ( $\text{\AA}^2 \times 10^{-3}$ )

For **3aa**.

| Atom   | x     | y    | z     | U(eq) |
|--------|-------|------|-------|-------|
| H(2)   | 6461  | 4820 | 2572  | 80    |
| H(3)   | 4755  | 4094 | 182   | 95    |
| H(4)   | 2407  | 3155 | 49    | 90    |
| H(5)   | 1572  | 2947 | 2262  | 75    |
| H(9A)  | 7590  | 5501 | 6907  | 109   |
| H(9B)  | 7575  | 5597 | 5158  | 109   |
| H(9C)  | 8407  | 4651 | 6179  | 109   |
| H(10A) | 3209  | 2756 | 7045  | 106   |
| H(10B) | 4194  | 2322 | 5970  | 106   |
| H(10C) | 2178  | 2396 | 5312  | 106   |
| H(11A) | 755   | 4040 | 5002  | 60    |
| H(11B) | 1968  | 4514 | 6586  | 60    |
| H(14)  | -411  | 6466 | 1219  | 87    |
| H(15)  | 868   | 7900 | 2550  | 103   |
| H(16)  | 2429  | 7834 | 5193  | 94    |
| H(18A) | 3914  | 5735 | 7525  | 83    |
| H(18B) | 4157  | 6895 | 7403  | 83    |
| H(20A) | 3405  | 7430 | 10263 | 125   |
| H(20B) | 4498  | 6467 | 10251 | 125   |
| H(20C) | 2828  | 6379 | 10699 | 125   |
| H(21A) | -325  | 4817 | 205   | 130   |
| H(21B) | -2050 | 5131 | 442   | 130   |
| H(21C) | -1593 | 3989 | 394   | 130   |

**Table S7.** Torsion angles [ $^\circ$ ] for **3aa**.

|                     |           |
|---------------------|-----------|
| C(8)-N(1)-C(1)-C(2) | -173.4(3) |
|---------------------|-----------|

|                         |           |
|-------------------------|-----------|
| C(9)-N(1)-C(1)-C(2)     | -1.0(4)   |
| C(8)-N(1)-C(1)-C(6)     | 2.8(3)    |
| C(9)-N(1)-C(1)-C(6)     | 175.2(3)  |
| C(6)-C(1)-C(2)-C(3)     | -0.8(4)   |
| N(1)-C(1)-C(2)-C(3)     | 175.0(3)  |
| C(1)-C(2)-C(3)-C(4)     | -1.1(5)   |
| C(2)-C(3)-C(4)-C(5)     | 1.5(5)    |
| C(3)-C(4)-C(5)-C(6)     | 0.1(5)    |
| C(4)-C(5)-C(6)-C(1)     | -1.9(4)   |
| C(4)-C(5)-C(6)-C(7)     | -178.4(3) |
| C(2)-C(1)-C(6)-C(5)     | 2.3(4)    |
| N(1)-C(1)-C(6)-C(5)     | -174.2(2) |
| C(2)-C(1)-C(6)-C(7)     | 179.5(2)  |
| N(1)-C(1)-C(6)-C(7)     | 3.1(3)    |
| C(5)-C(6)-C(7)-C(8)     | 169.9(3)  |
| C(1)-C(6)-C(7)-C(8)     | -6.9(3)   |
| C(5)-C(6)-C(7)-C(10)    | 52.2(4)   |
| C(1)-C(6)-C(7)-C(10)    | -124.6(2) |
| C(5)-C(6)-C(7)-C(11)    | -73.4(4)  |
| C(1)-C(6)-C(7)-C(11)    | 109.8(2)  |
| C(1)-N(1)-C(8)-O(1)     | 172.9(3)  |
| C(9)-N(1)-C(8)-O(1)     | 0.2(4)    |
| C(1)-N(1)-C(8)-C(7)     | -7.5(3)   |
| C(9)-N(1)-C(8)-C(7)     | 179.9(2)  |
| C(6)-C(7)-C(8)-O(1)     | -171.7(3) |
| C(10)-C(7)-C(8)-O(1)    | -51.4(4)  |
| C(11)-C(7)-C(8)-O(1)    | 68.1(3)   |
| C(6)-C(7)-C(8)-N(1)     | 8.7(3)    |
| C(10)-C(7)-C(8)-N(1)    | 129.0(2)  |
| C(11)-C(7)-C(8)-N(1)    | -111.5(2) |
| C(6)-C(7)-C(11)-C(12)   | -43.6(3)  |
| C(8)-C(7)-C(11)-C(12)   | 68.7(3)   |
| C(10)-C(7)-C(11)-C(12)  | -171.4(2) |
| C(7)-C(11)-C(12)-C(17)  | -92.4(3)  |
| C(7)-C(11)-C(12)-C(13)  | 88.7(3)   |
| C(21)-O(3)-C(13)-C(14)  | 11.3(4)   |
| C(21)-O(3)-C(13)-C(12)  | -170.3(2) |
| C(17)-C(12)-C(13)-O(3)  | -175.0(2) |
| C(11)-C(12)-C(13)-O(3)  | 3.9(3)    |
| C(17)-C(12)-C(13)-C(14) | 3.4(4)    |
| C(11)-C(12)-C(13)-C(14) | -177.7(2) |
| O(3)-C(13)-C(14)-C(15)  | 176.3(3)  |
| C(12)-C(13)-C(14)-C(15) | -1.9(5)   |
| C(13)-C(14)-C(15)-C(16) | -1.1(6)   |
| C(14)-C(15)-C(16)-C(17) | 2.6(6)    |
| C(13)-C(12)-C(17)-C(16) | -1.8(4)   |
| C(11)-C(12)-C(17)-C(16) | 179.3(3)  |
| C(13)-C(12)-C(17)-C(18) | 175.4(2)  |
| C(11)-C(12)-C(17)-C(18) | -3.5(4)   |
| C(15)-C(16)-C(17)-C(12) | -1.1(5)   |
| C(15)-C(16)-C(17)-C(18) | -178.5(3) |
| C(12)-C(17)-C(18)-C(19) | -89.6(4)  |
| C(16)-C(17)-C(18)-C(19) | 87.7(4)   |
| C(17)-C(18)-C(19)-O(2)  | 9.4(6)    |
| C(17)-C(18)-C(19)-C(20) | -172.2(3) |

**Table S8.** Hydrogen bonds for **3aa** [ $\text{\AA}$  and  $^\circ$ ].

| D-H...A | d(D-H) | d(H...A) | d(D...A) | $\angle$ (DHA) |
|---------|--------|----------|----------|----------------|
|---------|--------|----------|----------|----------------|

---

|                         |      |      |          |       |
|-------------------------|------|------|----------|-------|
| C(18)-<br>H(18A)···O(1) | 0.97 | 2.29 | 3.243(4) | 167.8 |
|-------------------------|------|------|----------|-------|

---

## 6. Reference

1. R. Liang, R. Chen, C. Zhong, J. Zhu, Z. Cao and Y. Jia. *Org. Lett.*, **2020**, *22*, 3215-3218.
2. J. Chen, J. Li, Y. Zhu and Q. Wang. *Org. Chem. Front.*, **2021**, *8*, 2532-2536.
3. X. Wu, H. Ye, G. Jiang and L. Hu. *Org. Biomol. Chem.*, **2021**, *19*, 4254-4257.
4. G. Lu, X. Huangfu, Z. Wu, G. Tang and Y. Zhao, *Adv. Synth. Catal.*, **2019**, *361*, 4961- 4965.
5. J. Rodríguez, A. Marchese and M. Lautens. *Org. Lett.*, **2018**, *20*, 4367-4370.
6. Q. Pan, Y. Ping, Y. Wang, Y. Guo and W. Kong. *J. Am. Chem. Soc.*, **2021**, *143*, 10282-10291.
7. L. Liu, F. Cheng, C. Meng, A. Zhang, M. Zhang, K. Xu, N. Ishida and M. Murakami. *ACS Catal.*, **2021**, *11*, 8942–8947.





7.26  
7.19  
7.18  
7.17  
7.16  
7.15  
7.12  
7.10  
7.08  
6.89  
6.87  
6.87  
6.85  
6.85  
6.75  
6.75  
6.73  
6.73  
6.65  
6.63

3.57  
3.45  
3.38  
3.35  
3.15  
2.91  
2.87  
2.35  
2.35  
2.33  
2.33  
2.31  
2.31  
2.30  
2.29  
1.38  
0.98  
0.96  
0.94

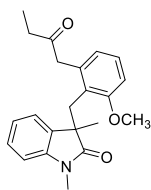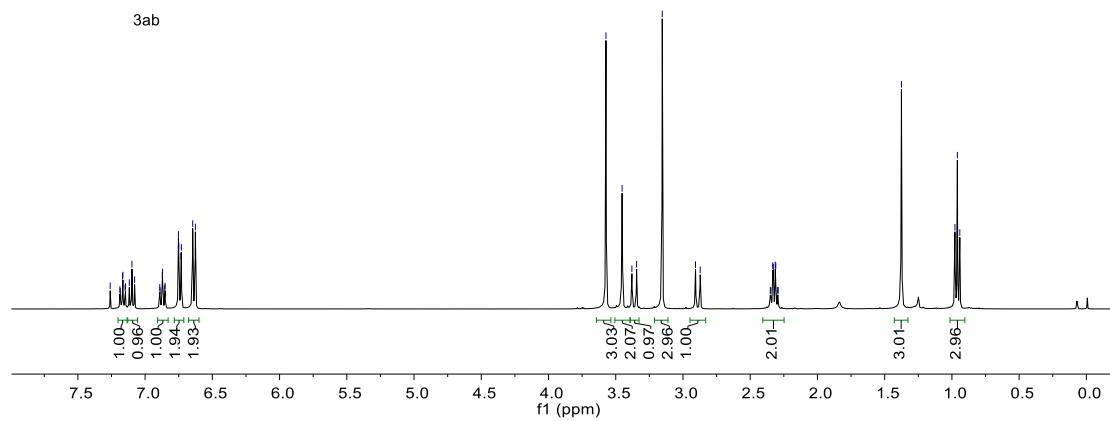

209.13  
181.04  
158.37  
142.77  
135.76  
133.69  
127.56  
127.53  
124.42  
124.08  
122.71  
121.66  
108.62  
107.56  
54.65  
49.11  
47.24  
35.31  
33.15  
26.21  
22.88  
7.80

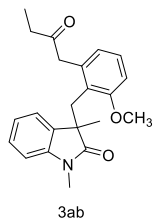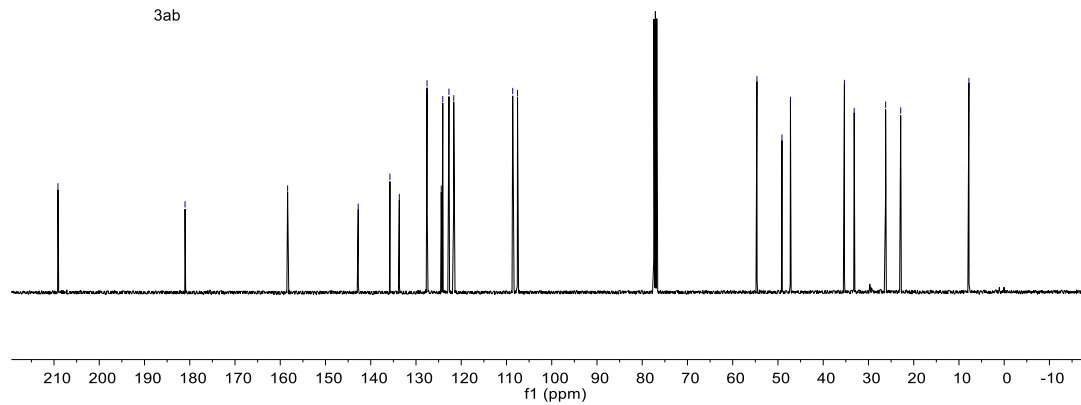

7.26  
7.18  
7.17  
7.15  
7.11  
7.09  
7.07  
6.89  
6.87  
6.85  
6.75  
6.73  
6.64  
6.62

3.57  
3.45  
3.37  
3.34  
3.15  
2.89  
2.86

2.31  
2.29  
2.28  
1.49  
1.48  
1.46  
1.44  
1.42  
1.37  
1.27  
1.25  
1.23  
1.21  
1.19  
1.17  
0.85  
0.84  
0.82

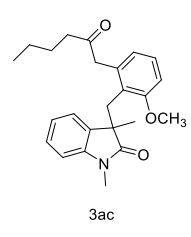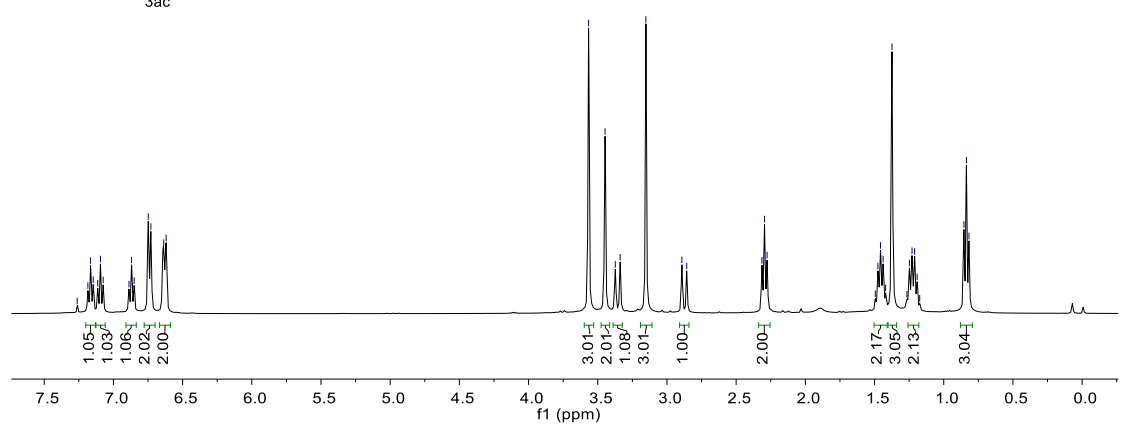

208.69  
181.04  
158.37  
142.77  
135.70  
133.72  
127.54  
127.52  
124.44  
124.08  
122.73  
121.65  
108.64  
107.54  
54.64  
49.11  
47.58  
41.86  
33.19  
26.19  
25.89  
22.86  
22.25  
13.86

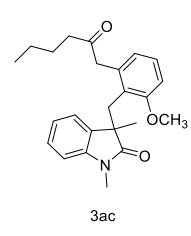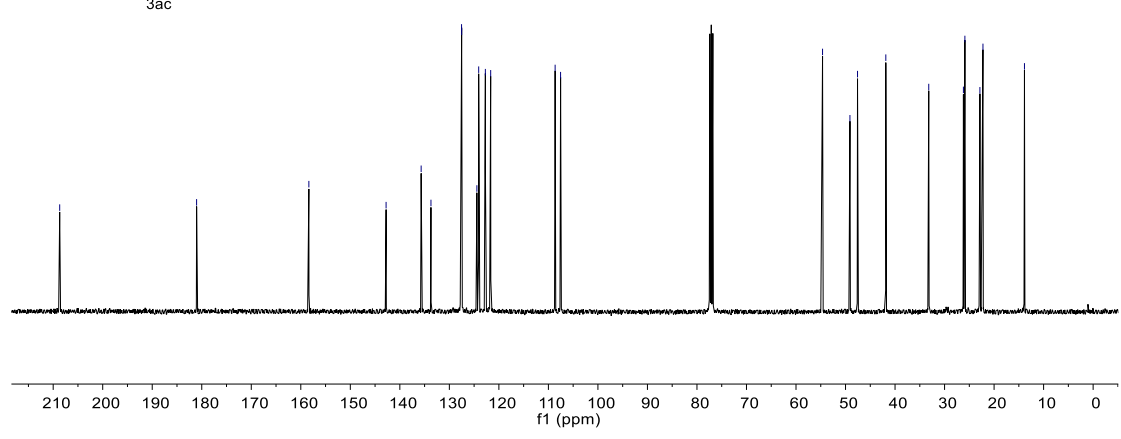

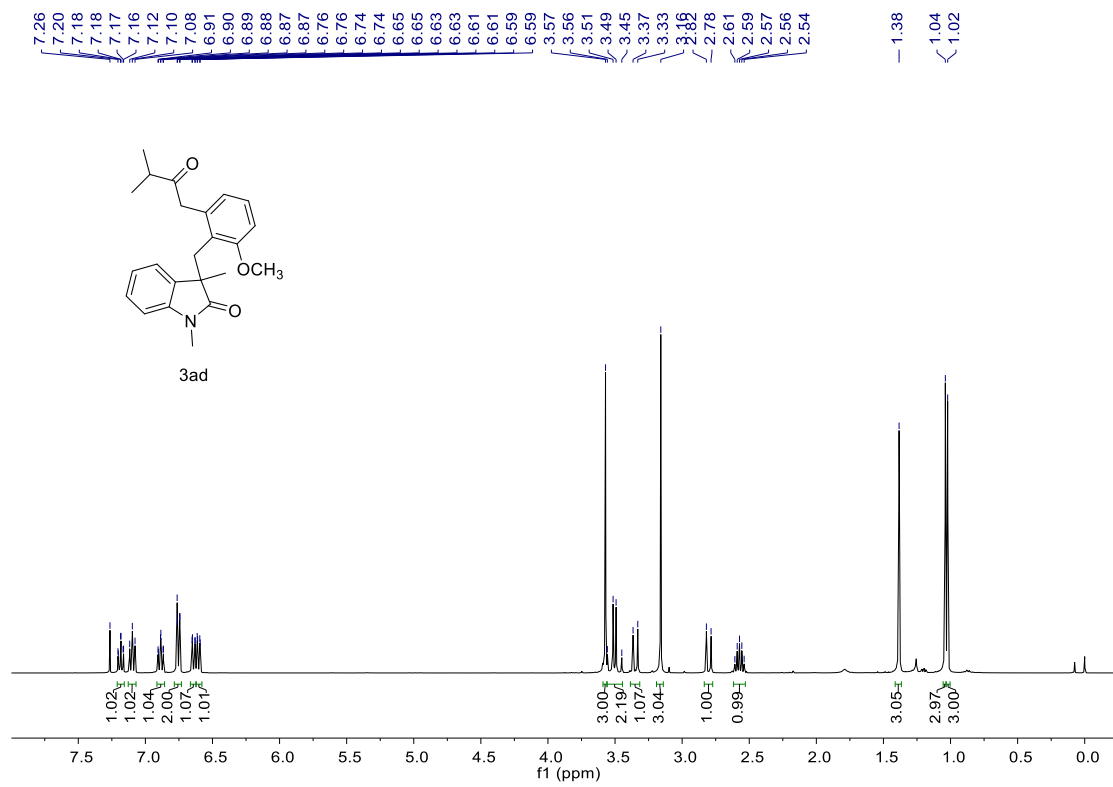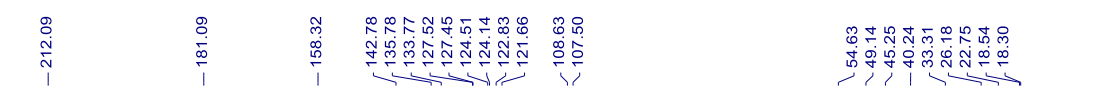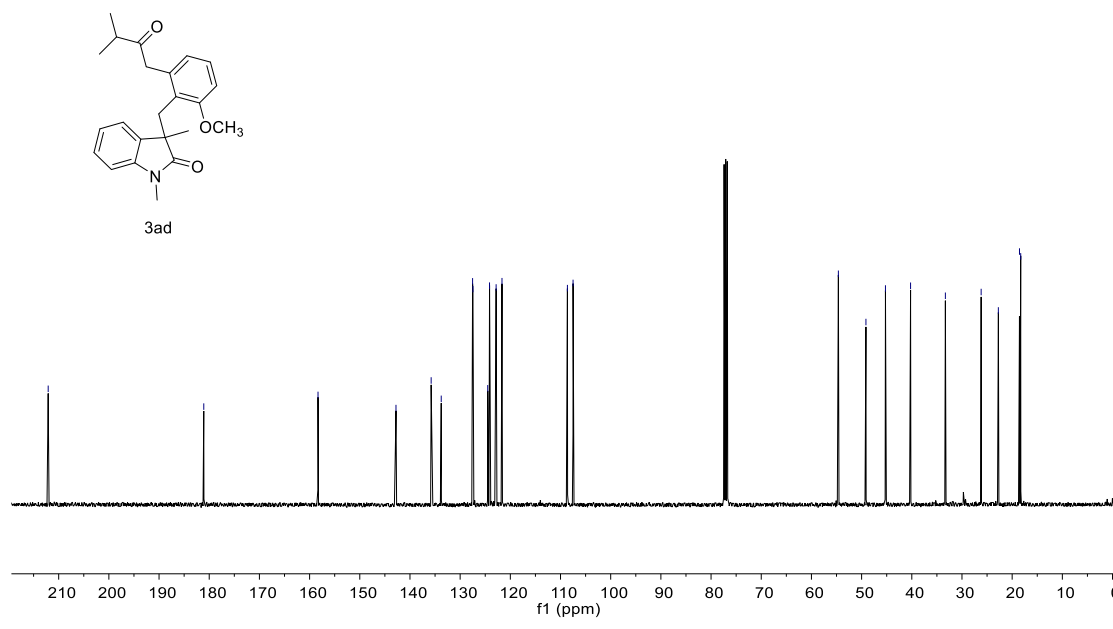

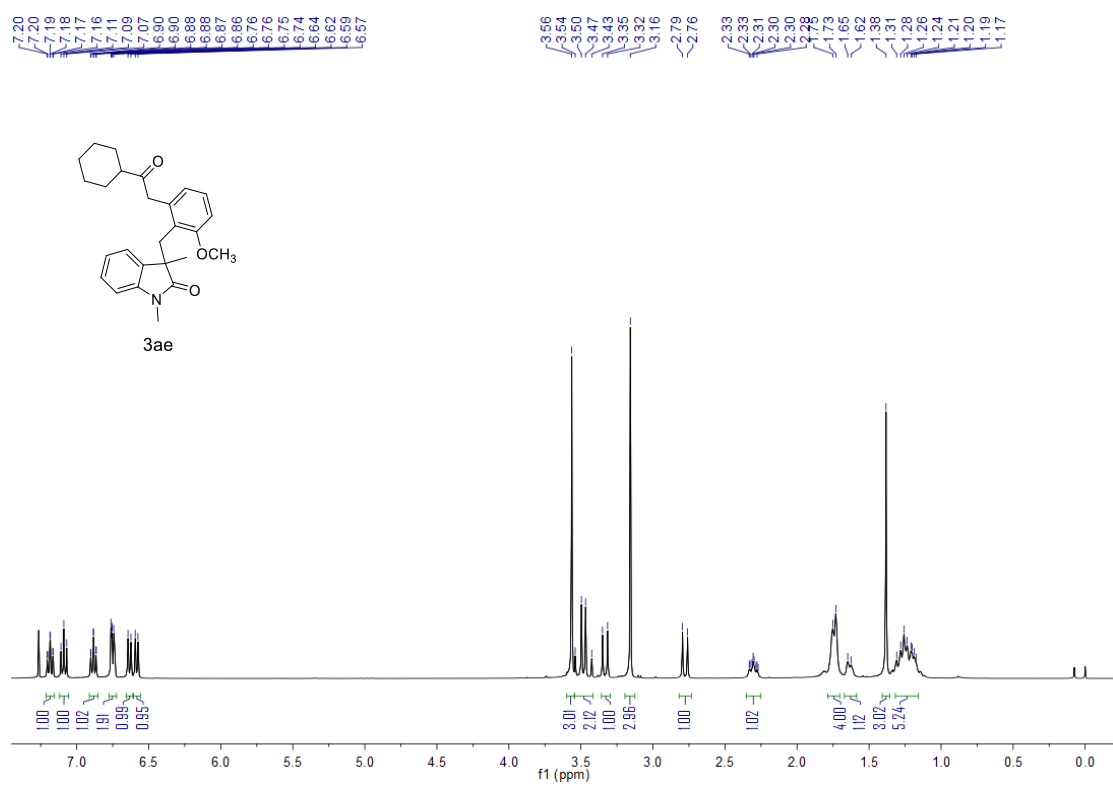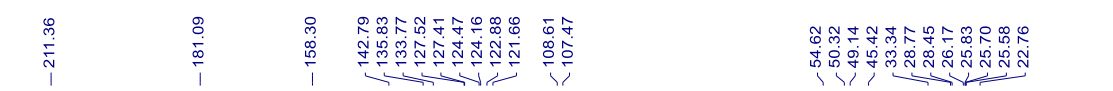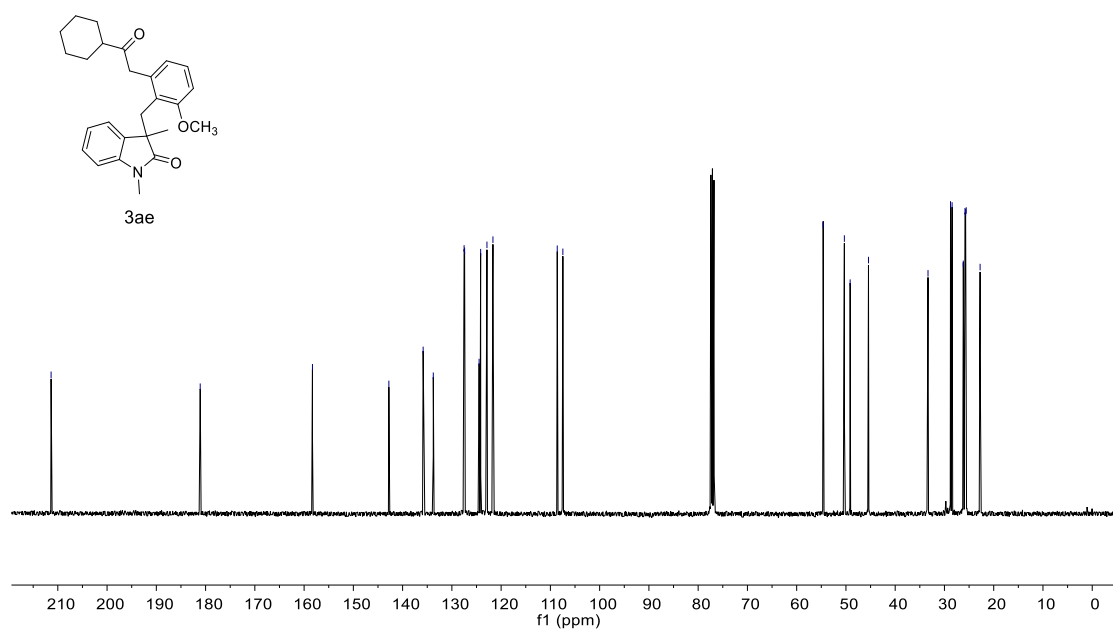

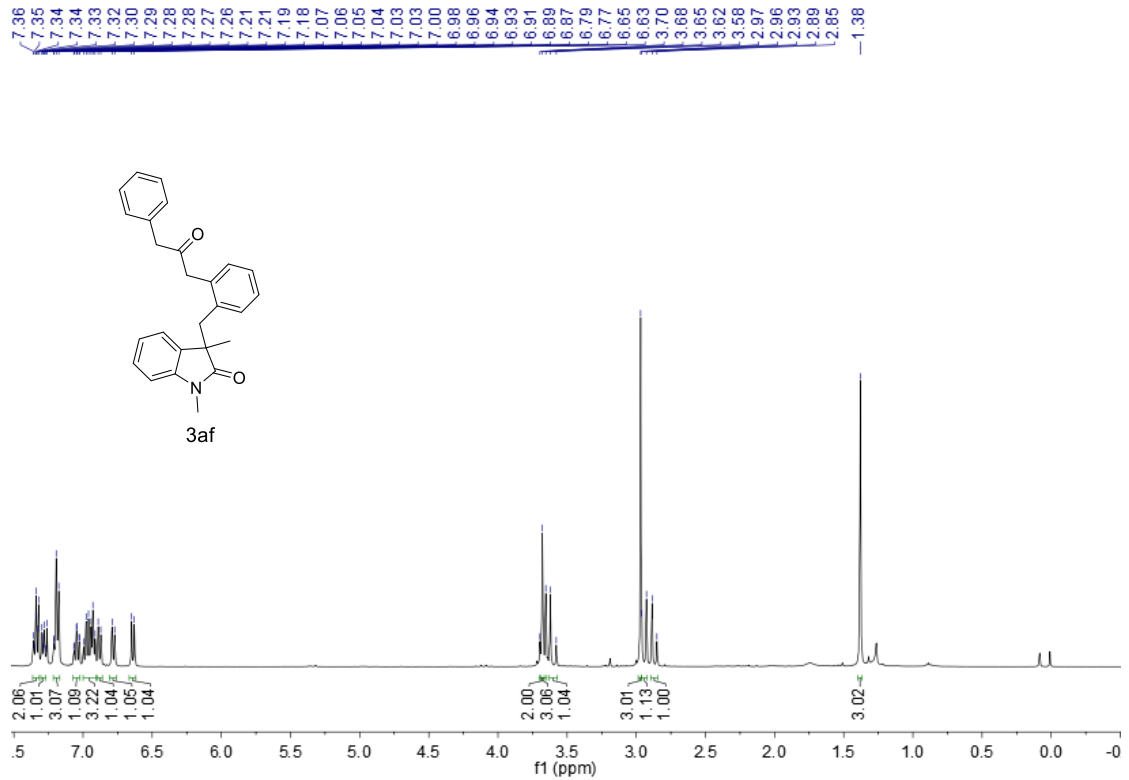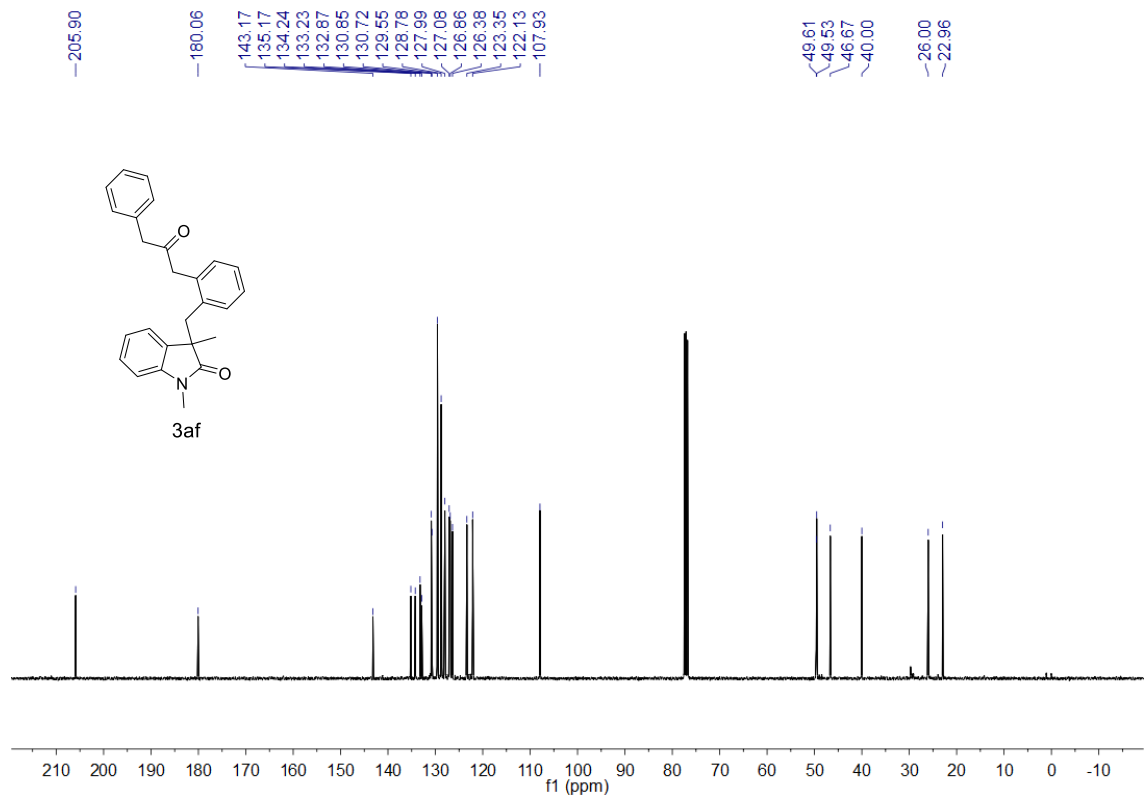

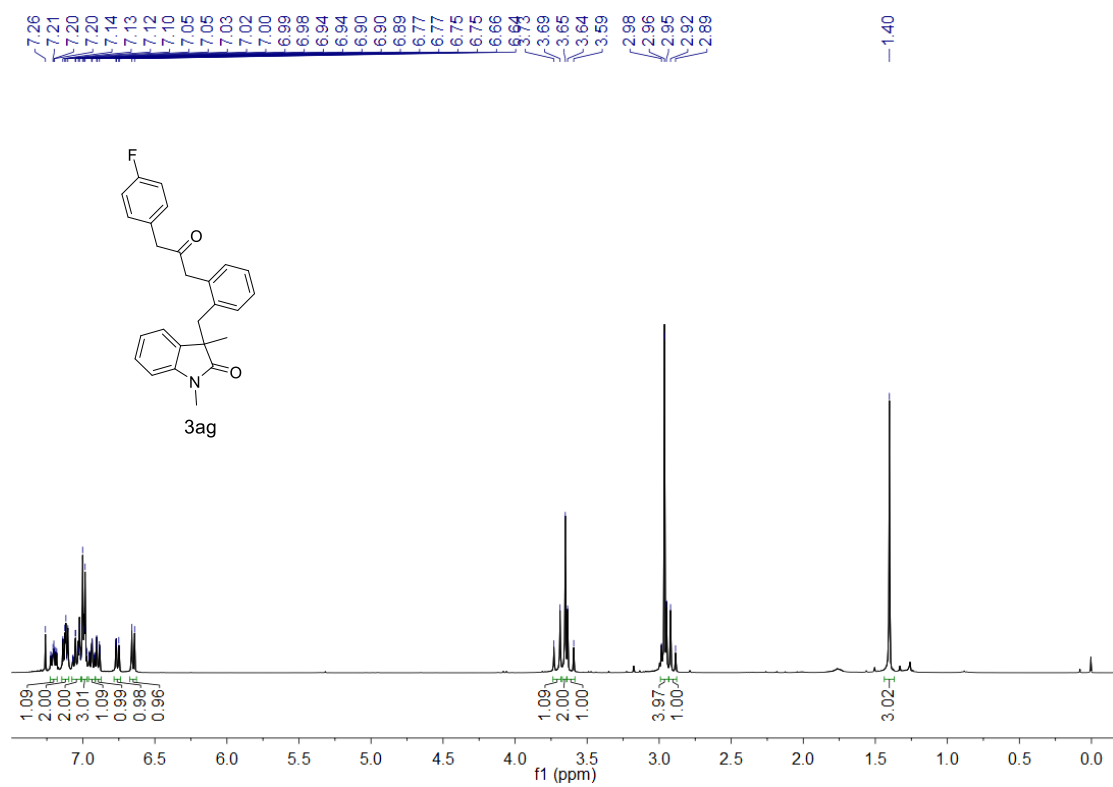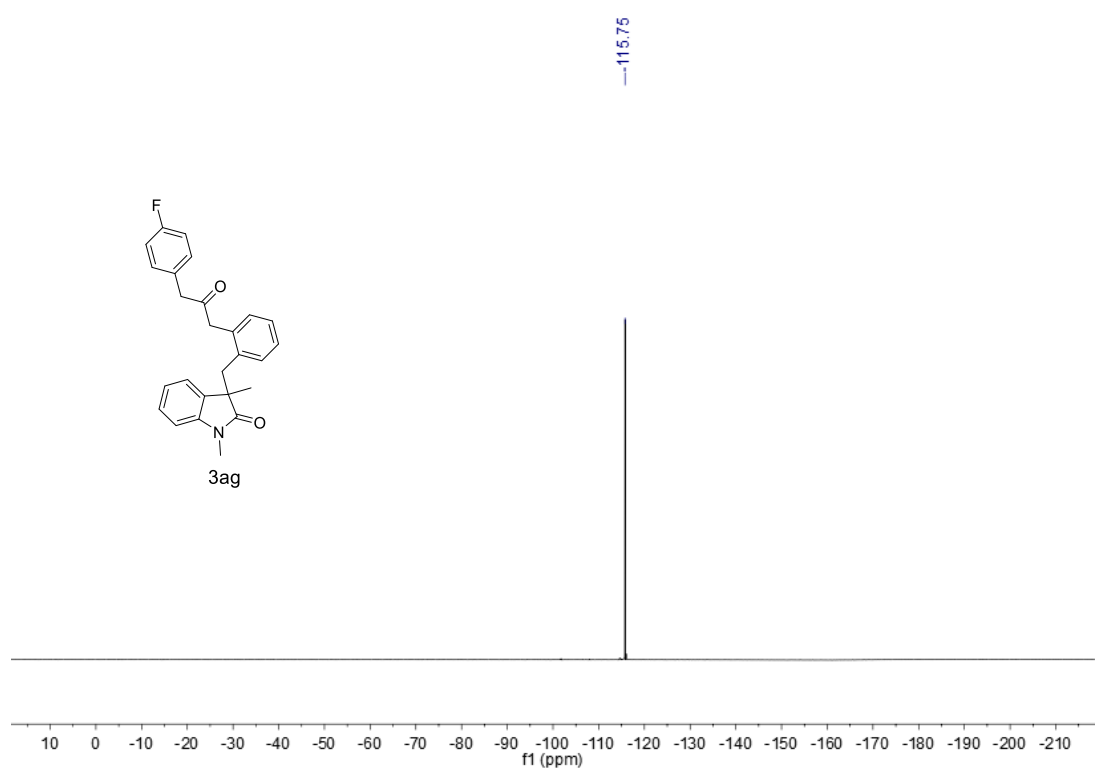

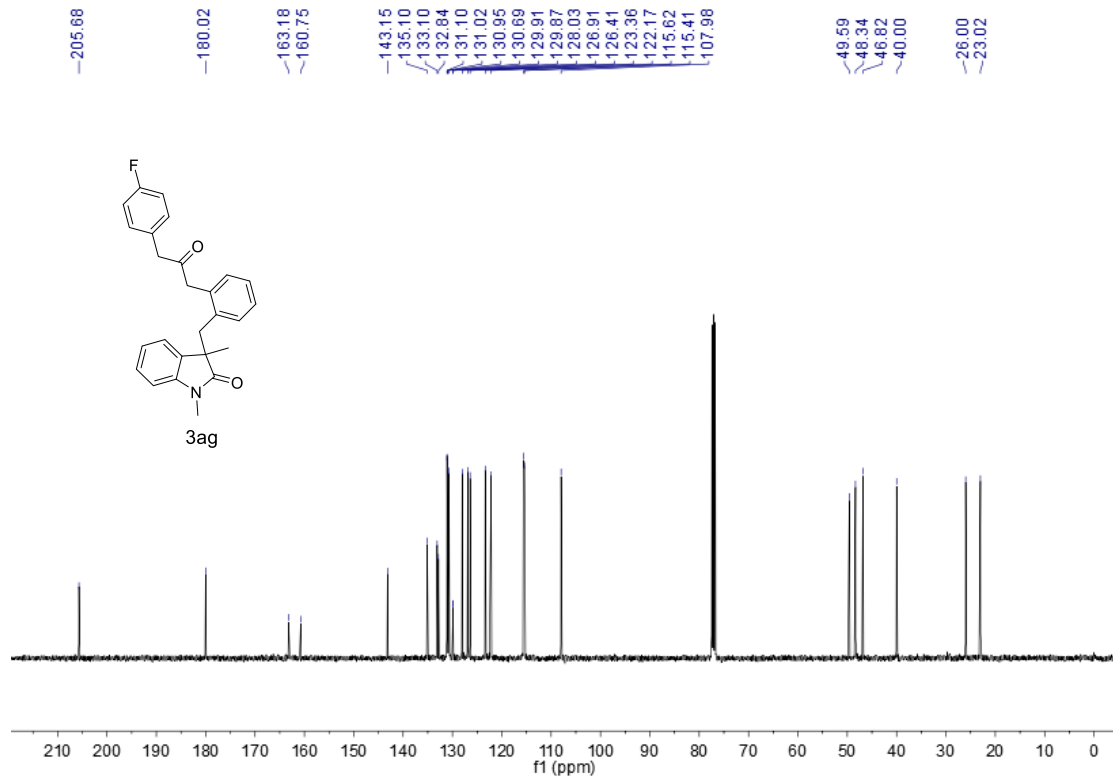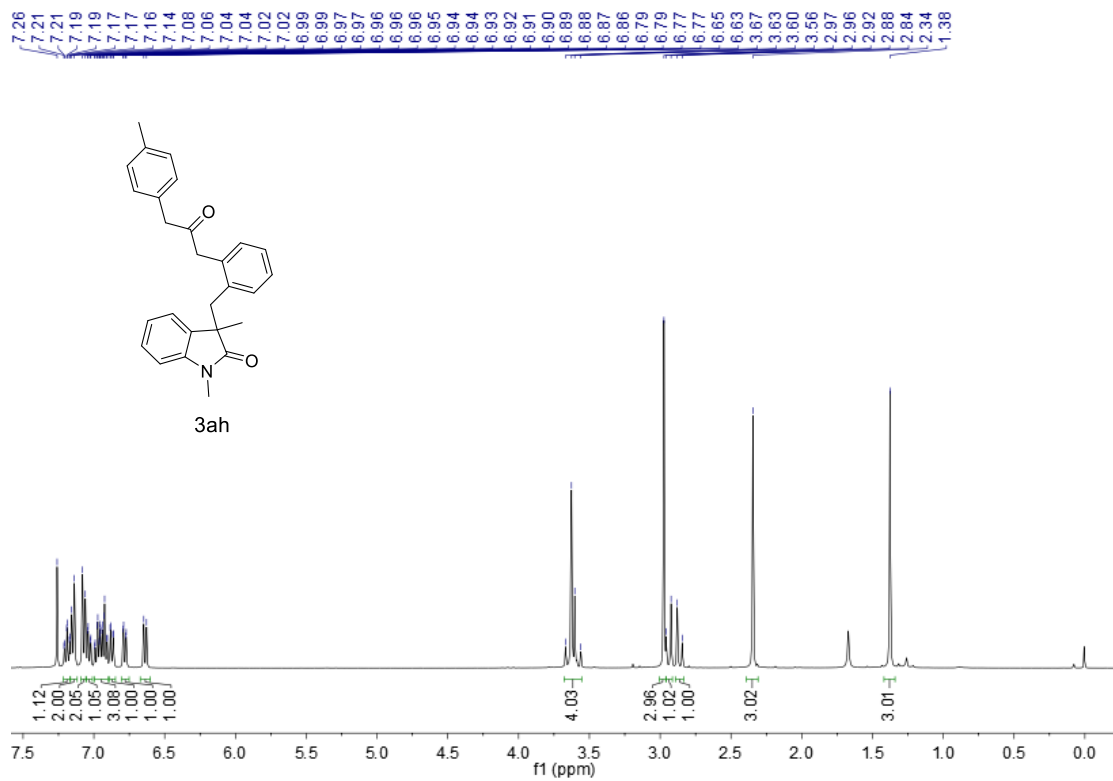

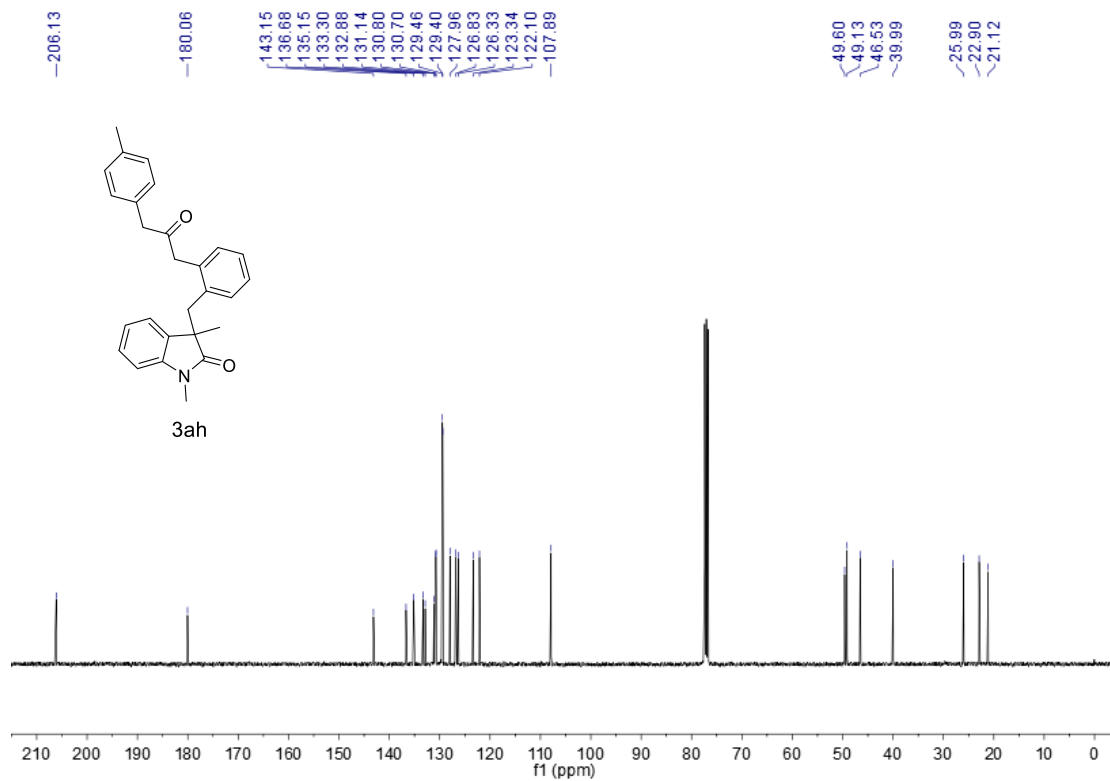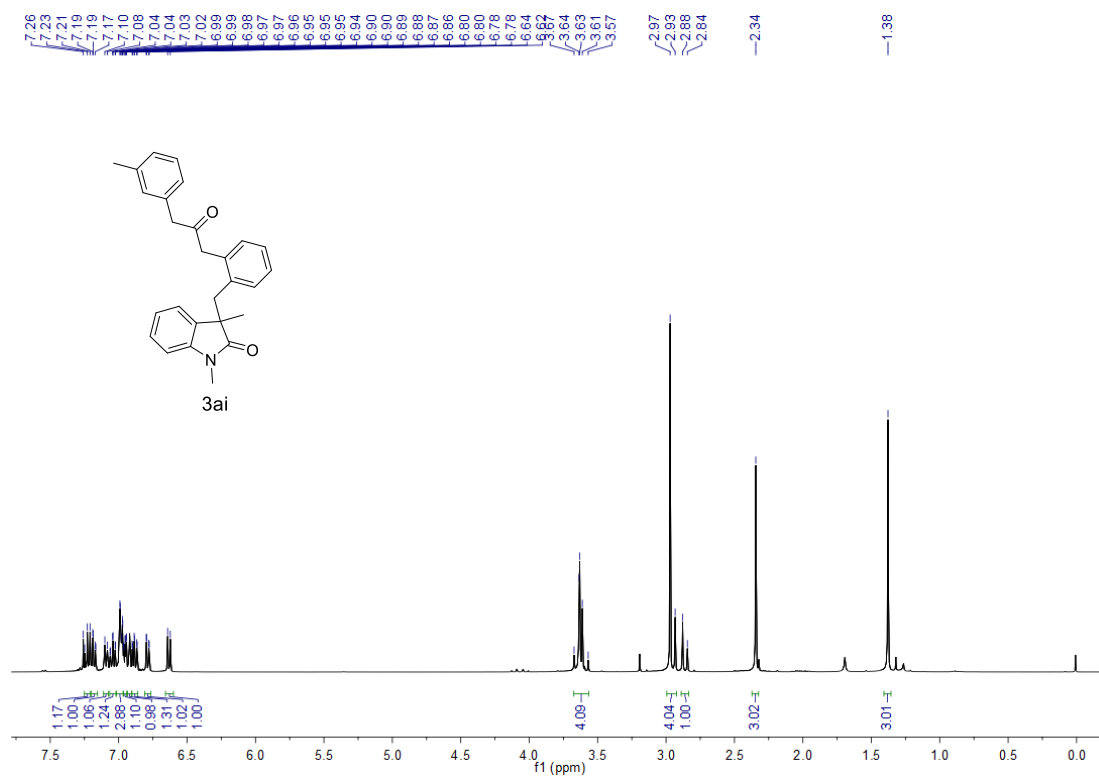



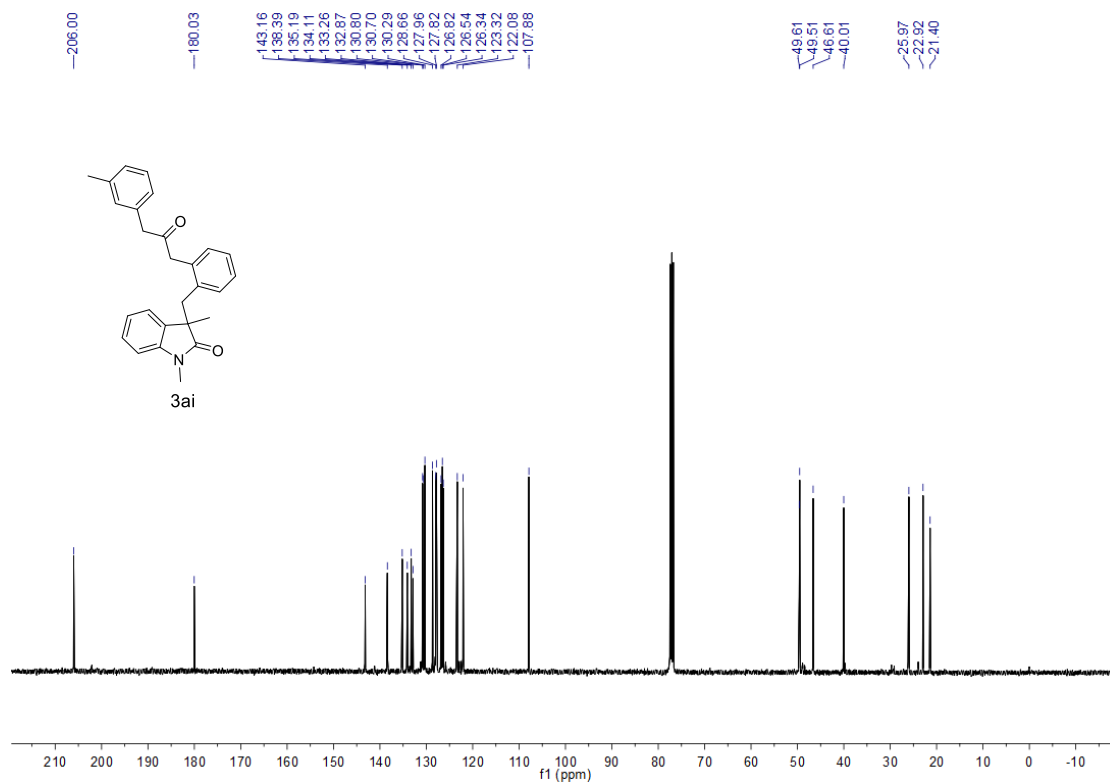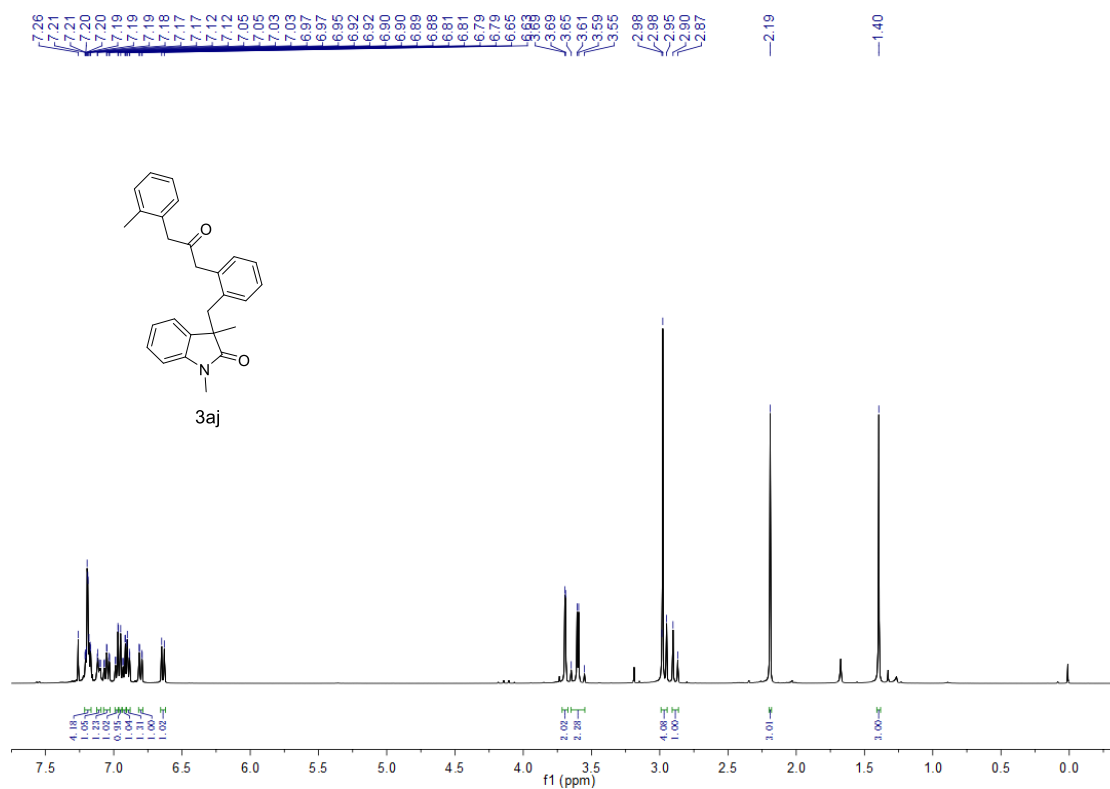

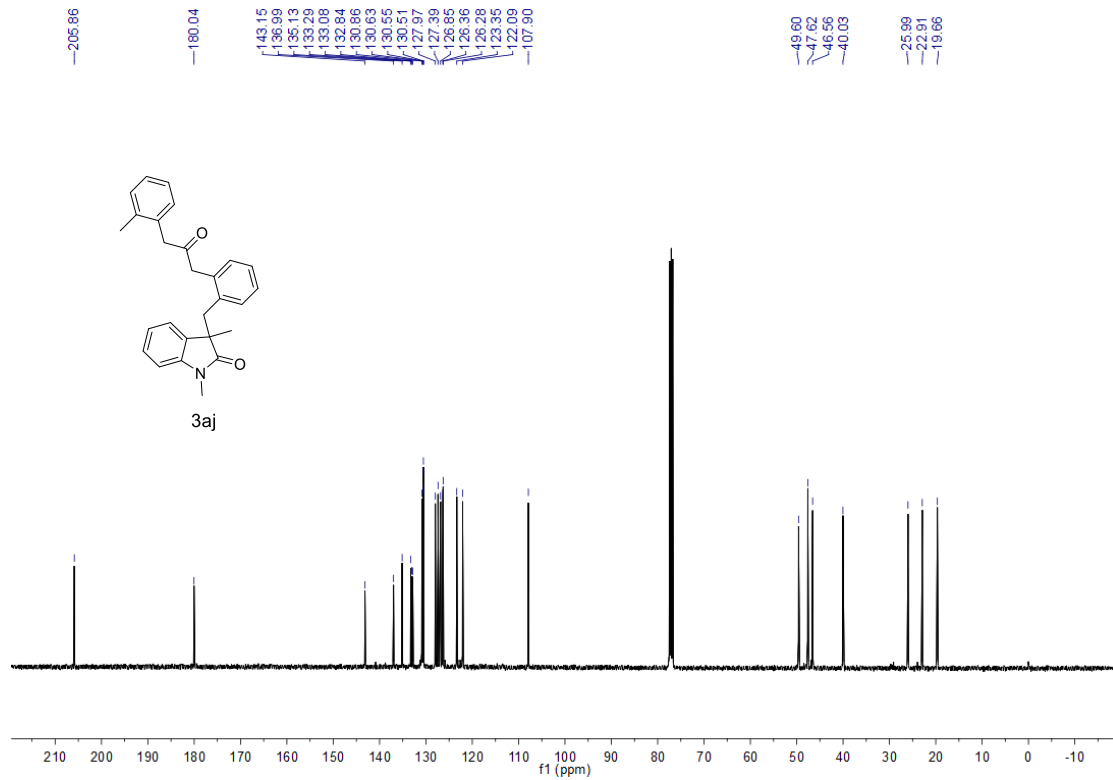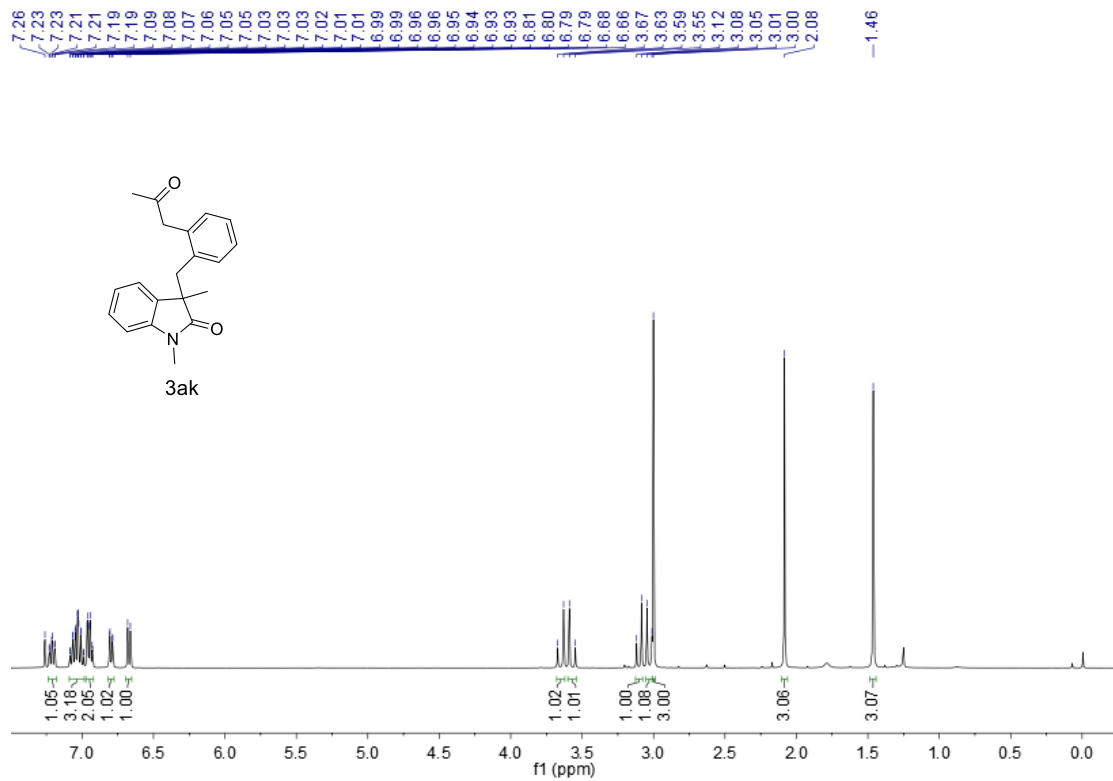

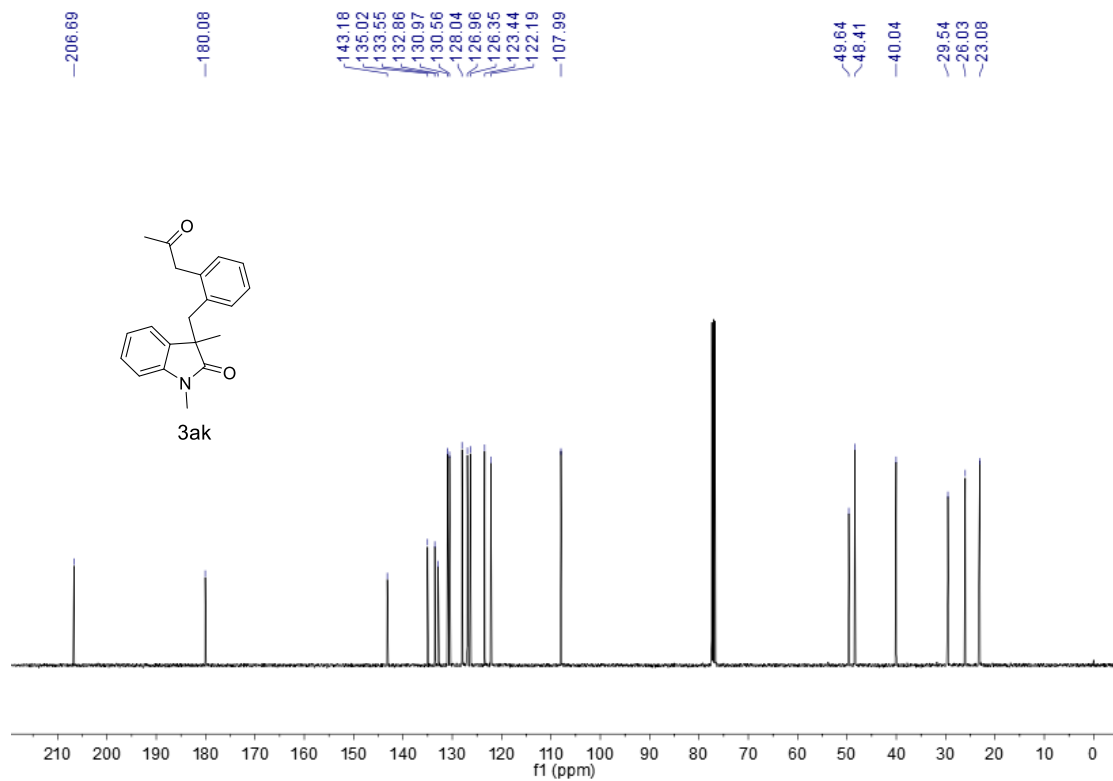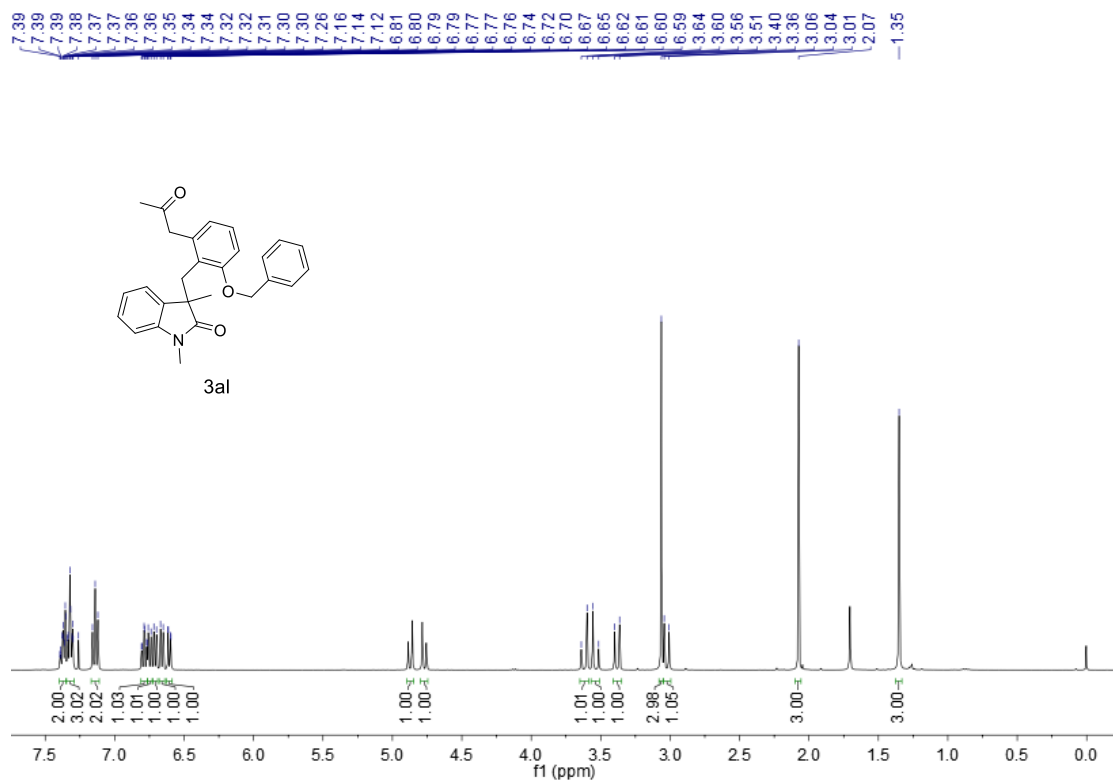

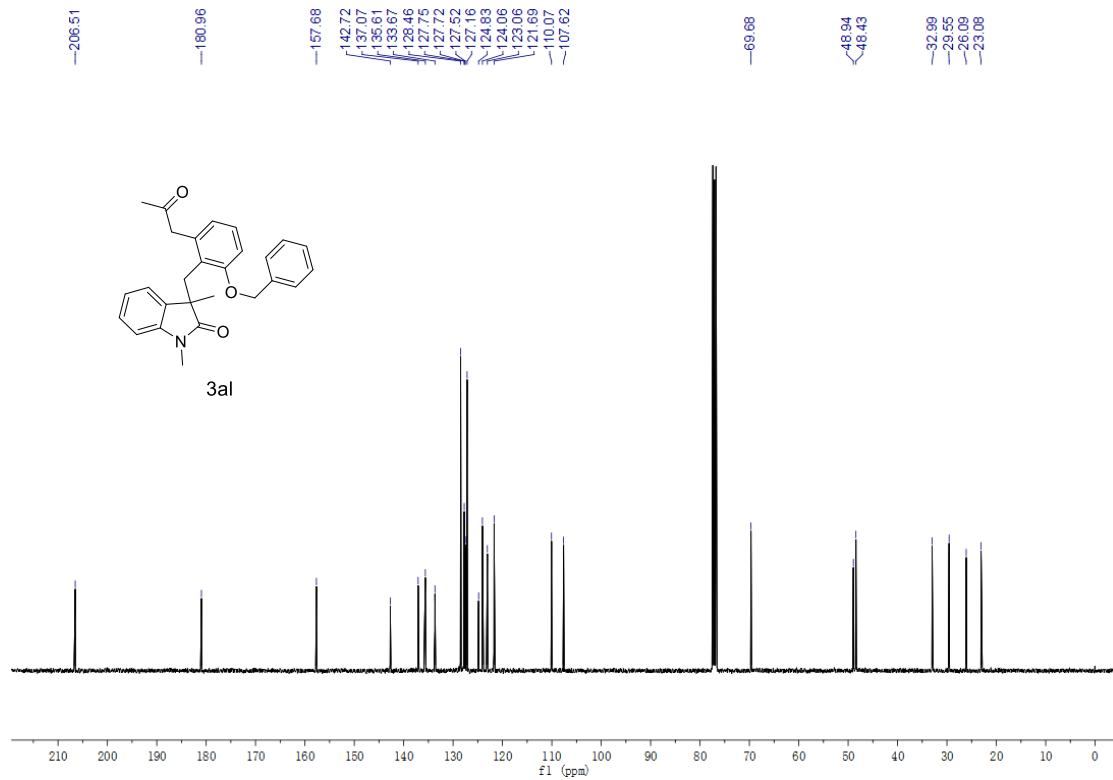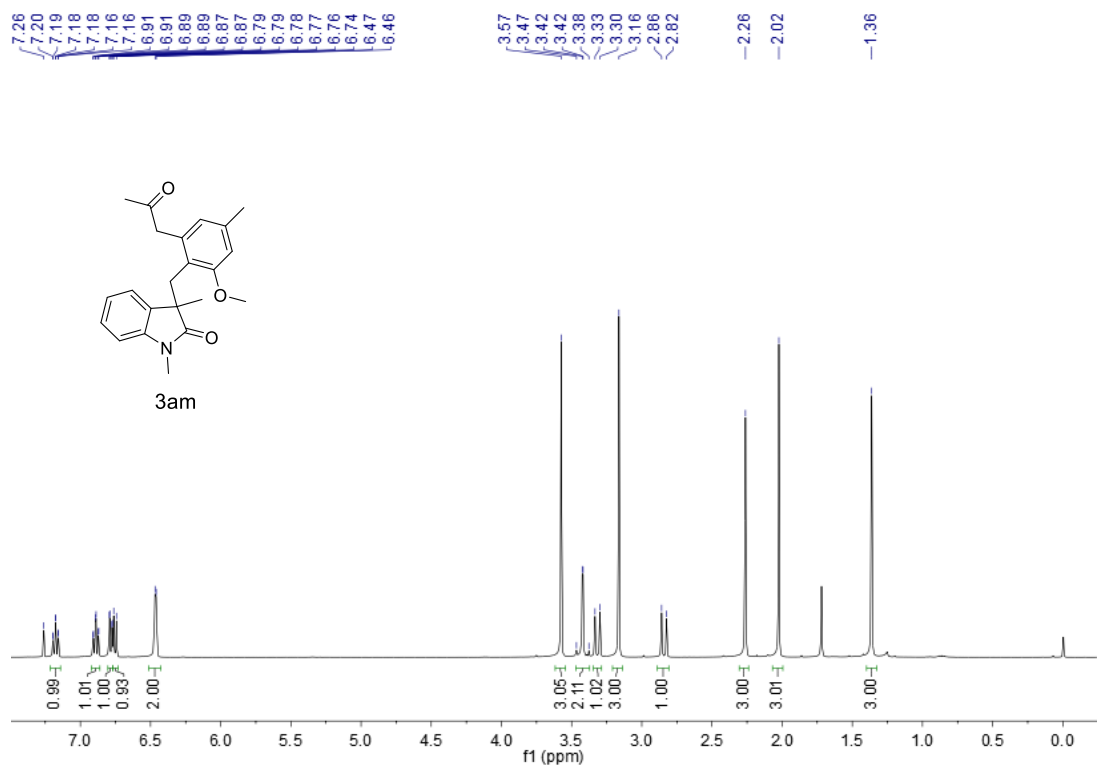

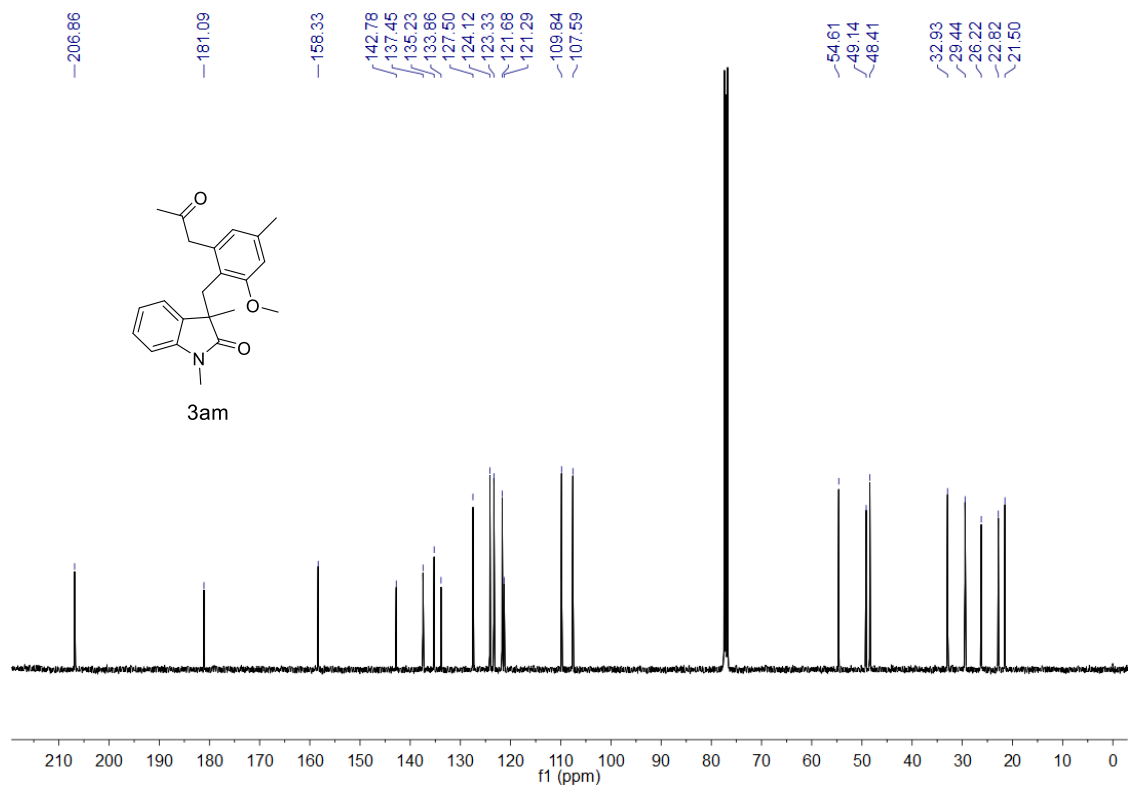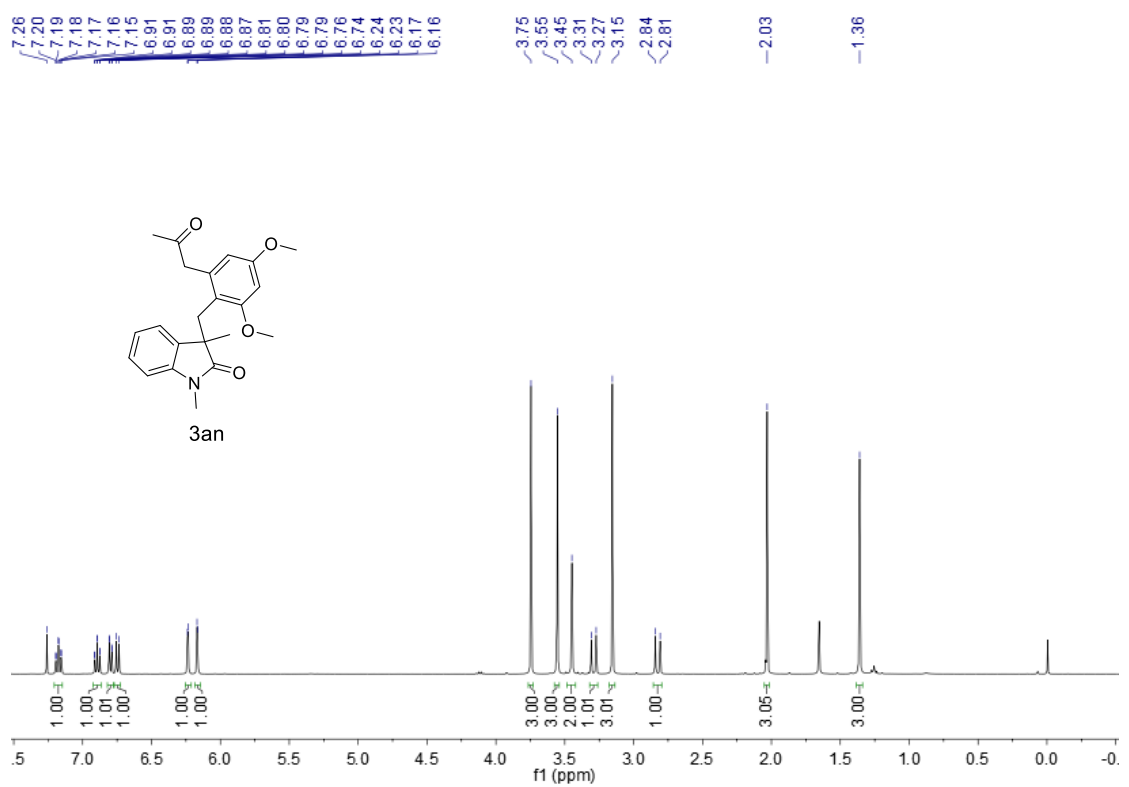

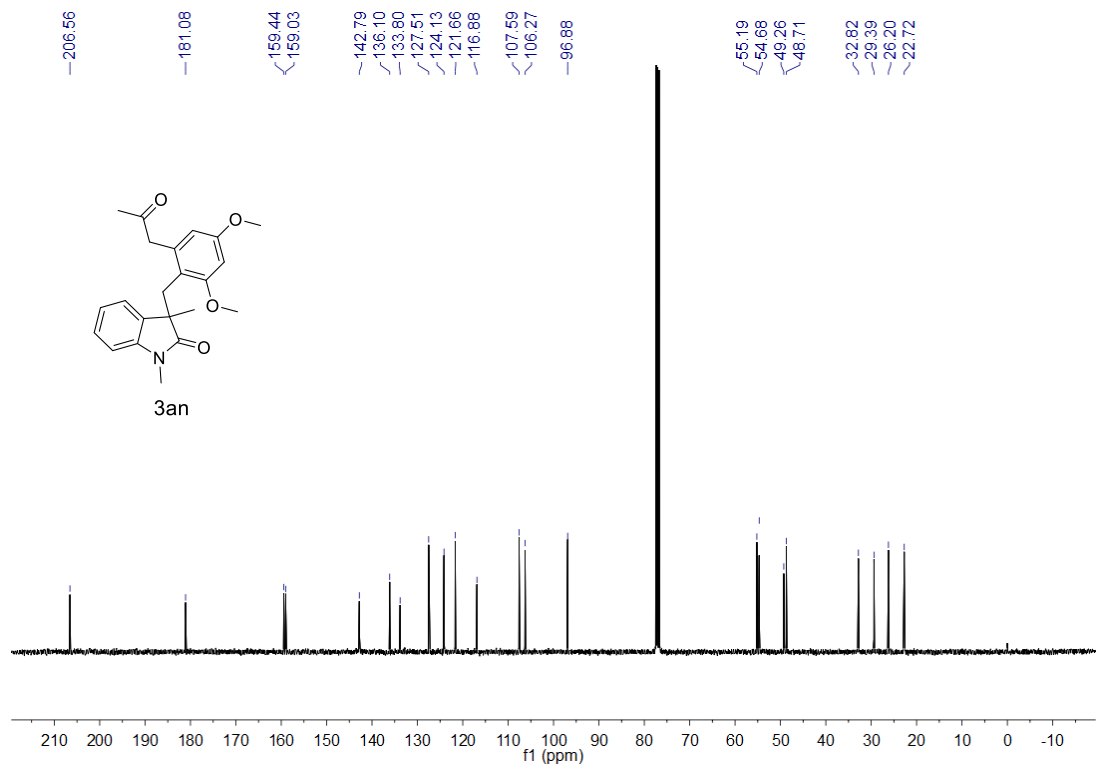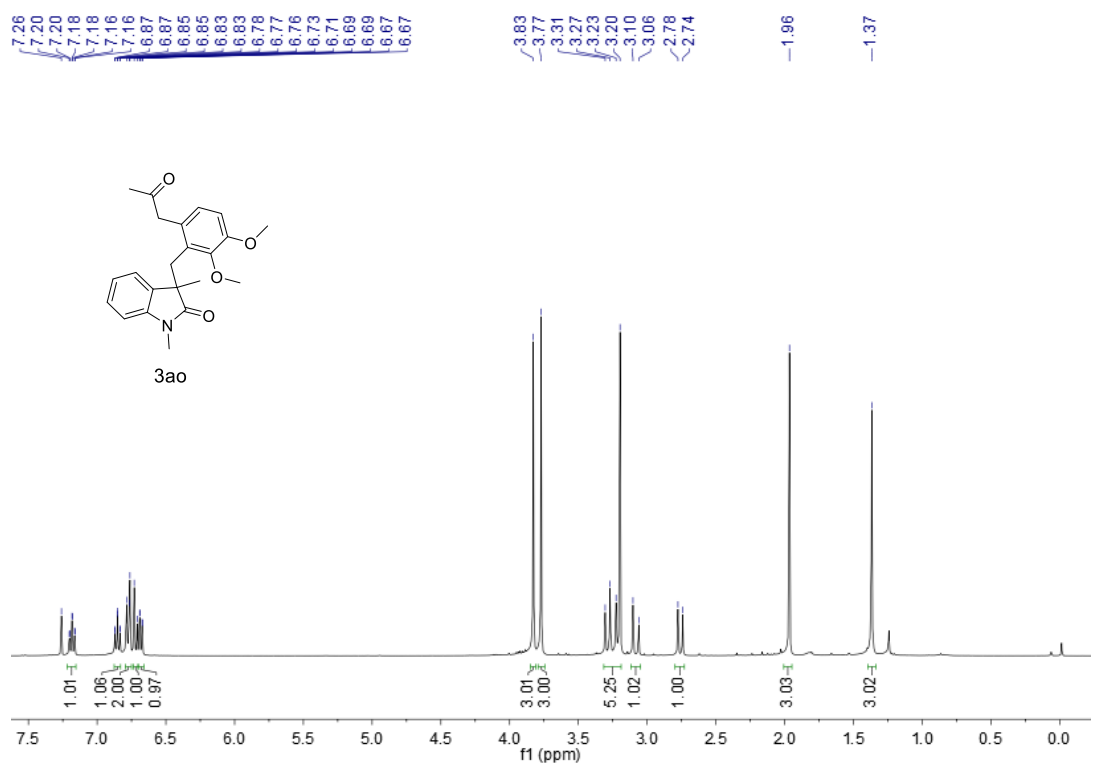

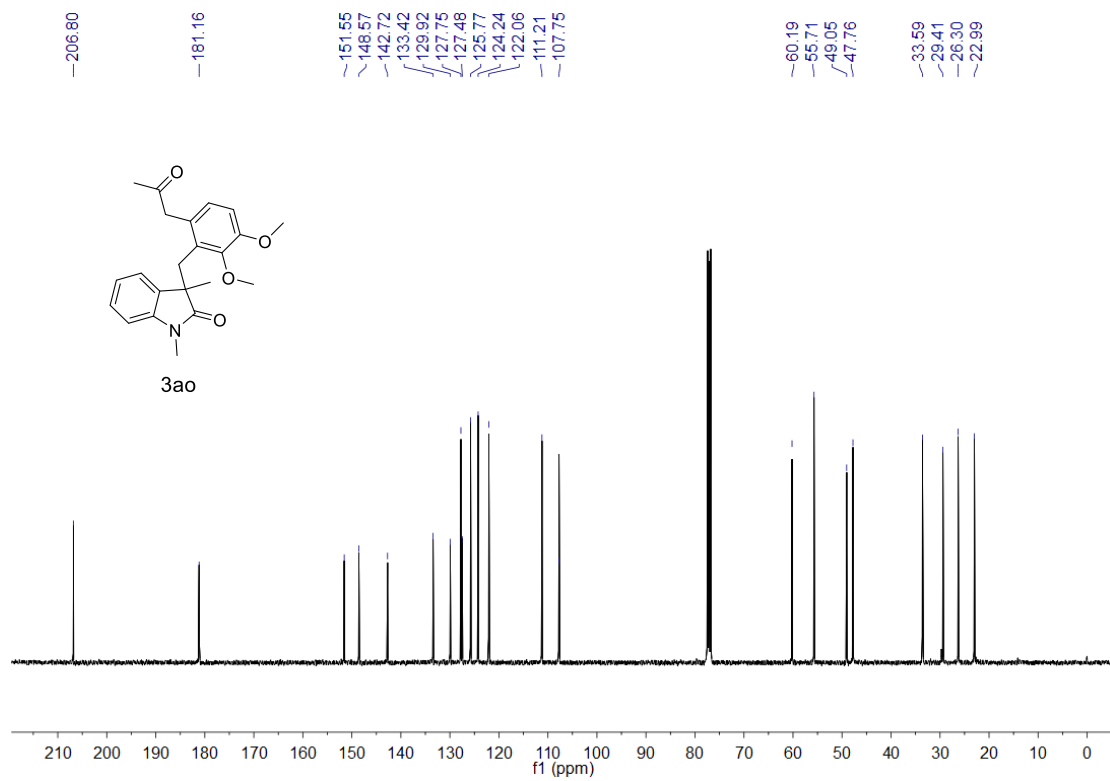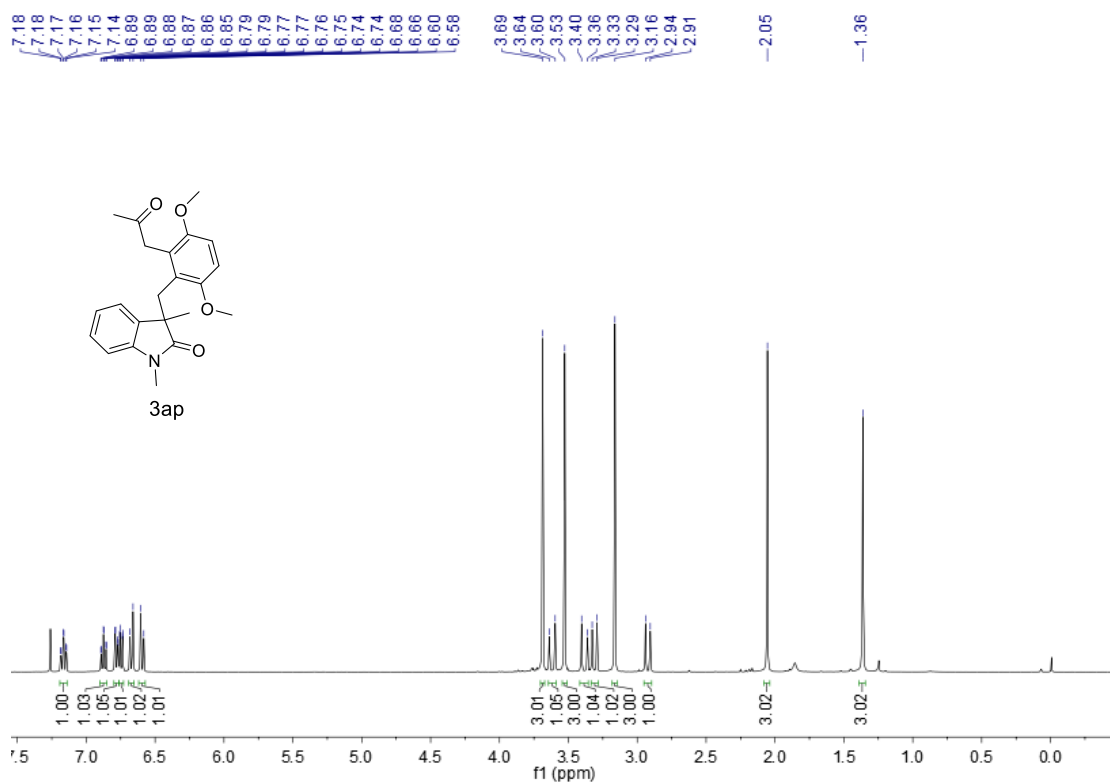

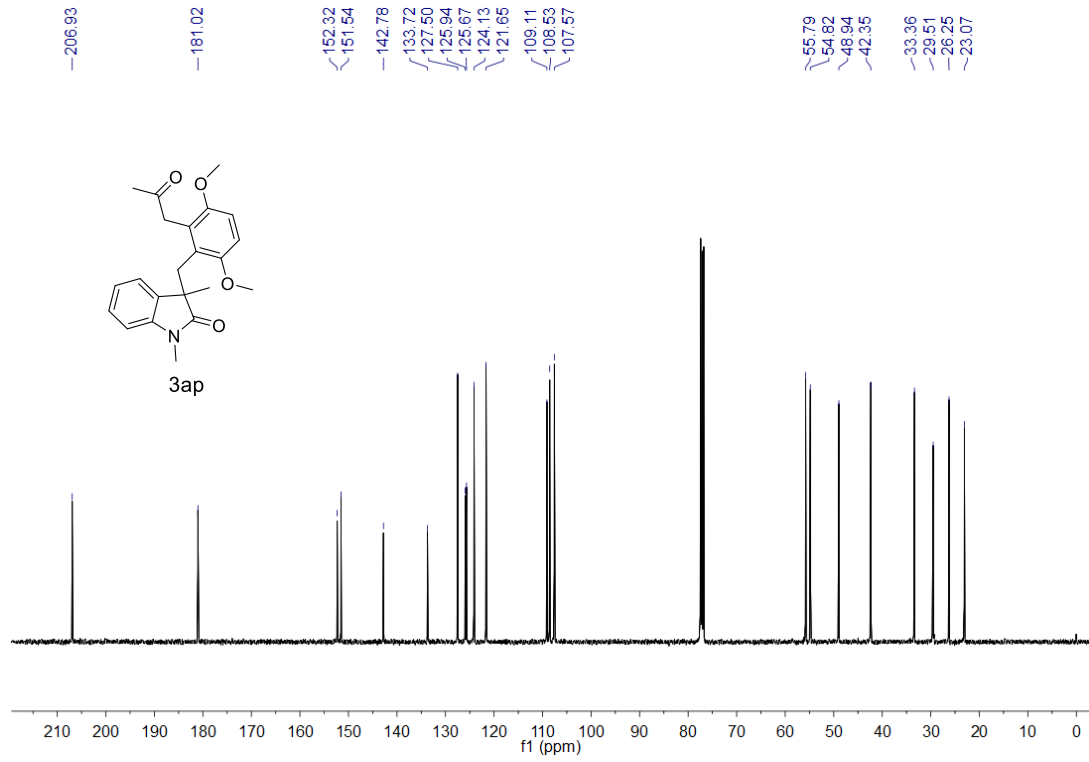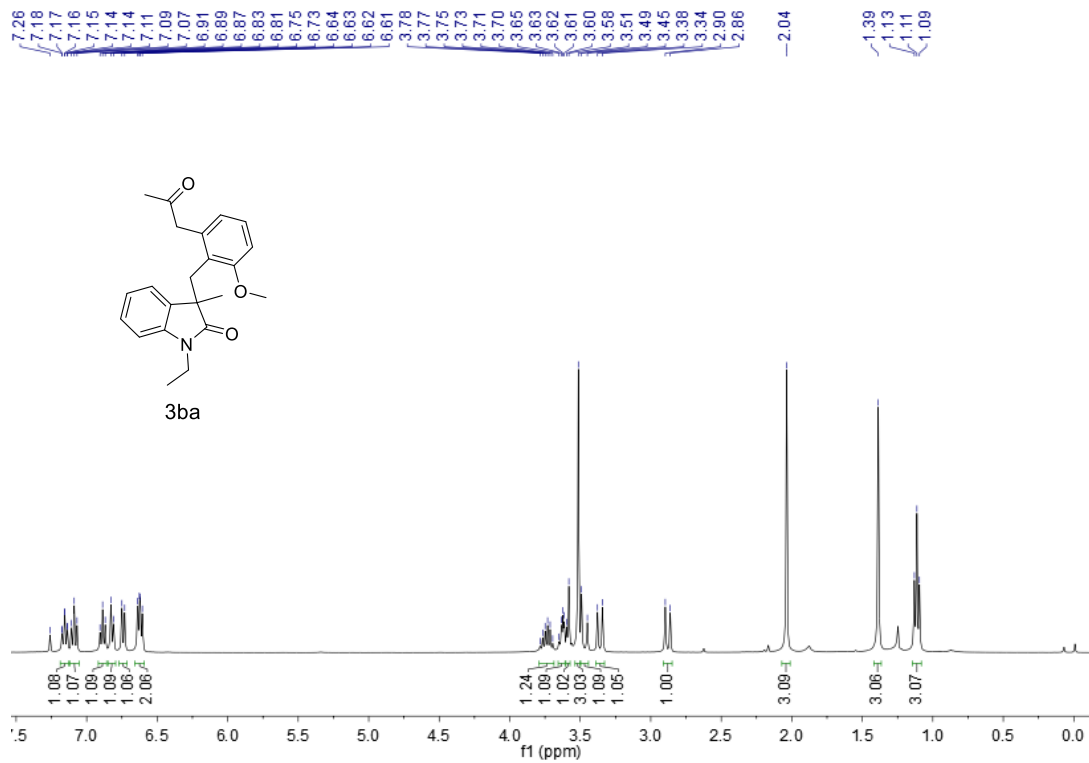



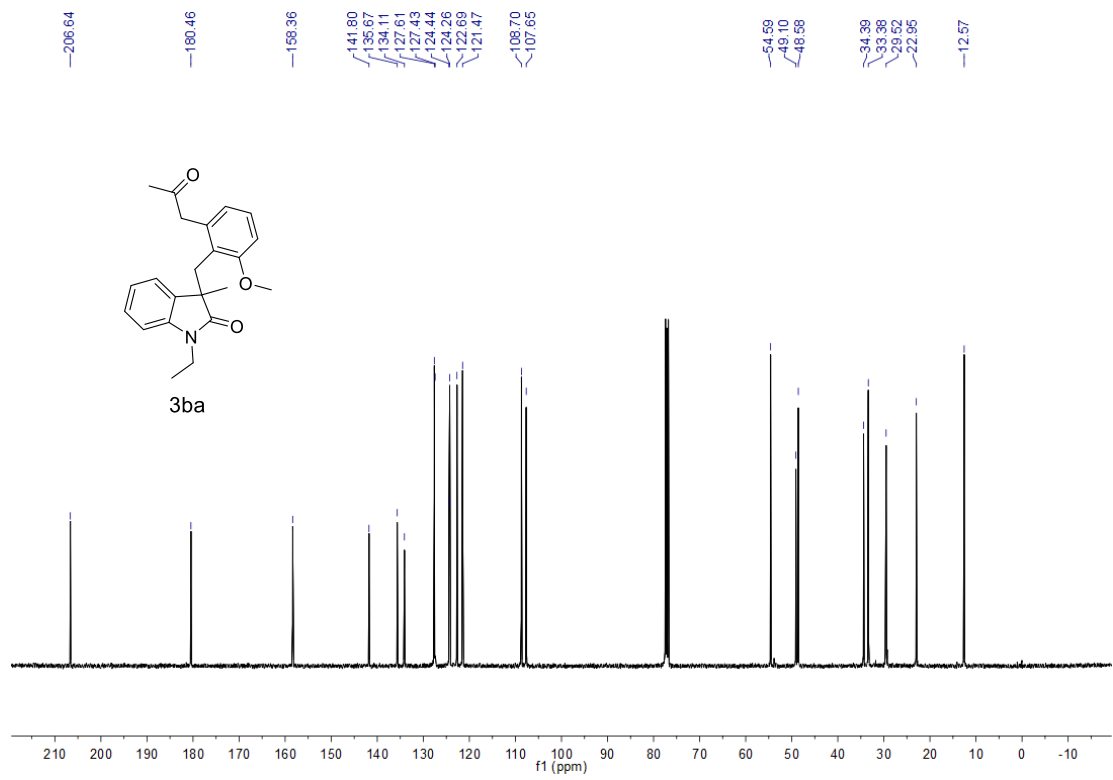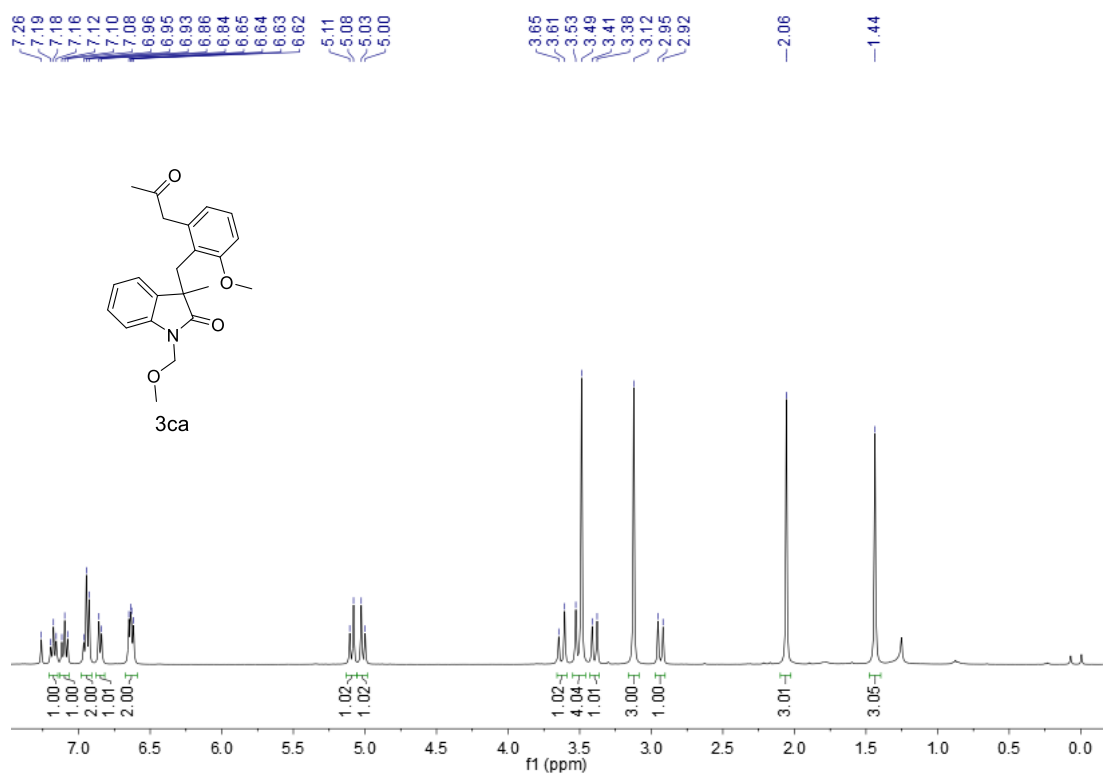

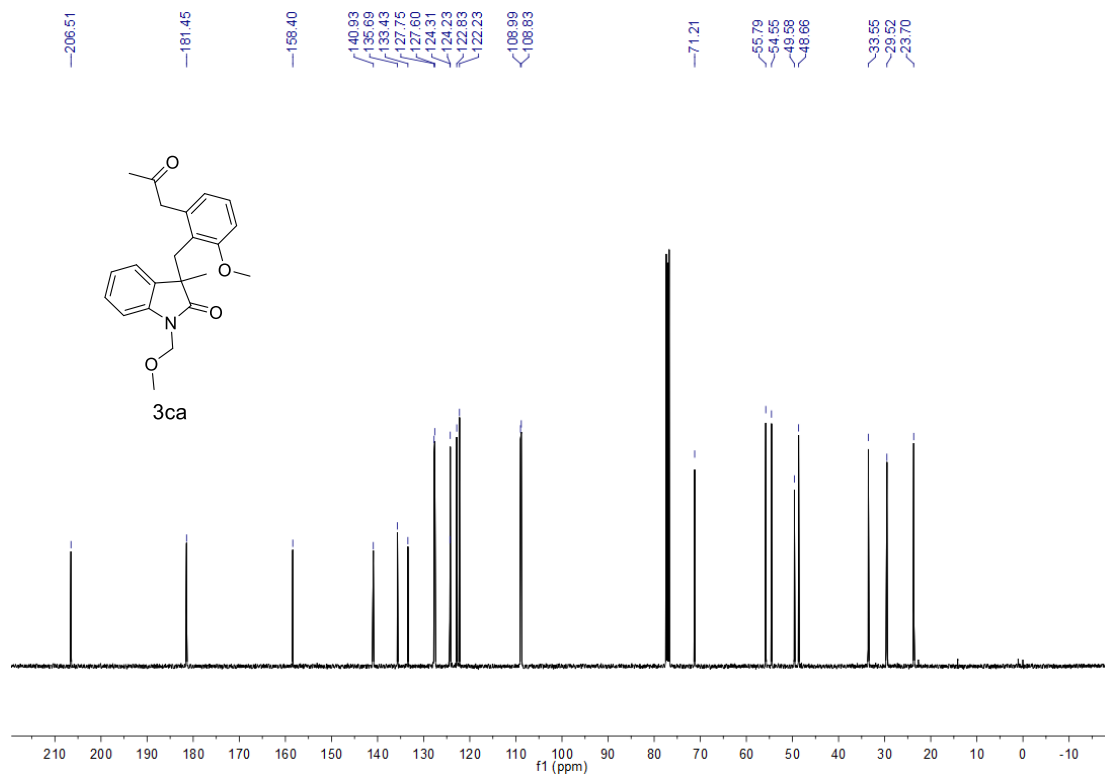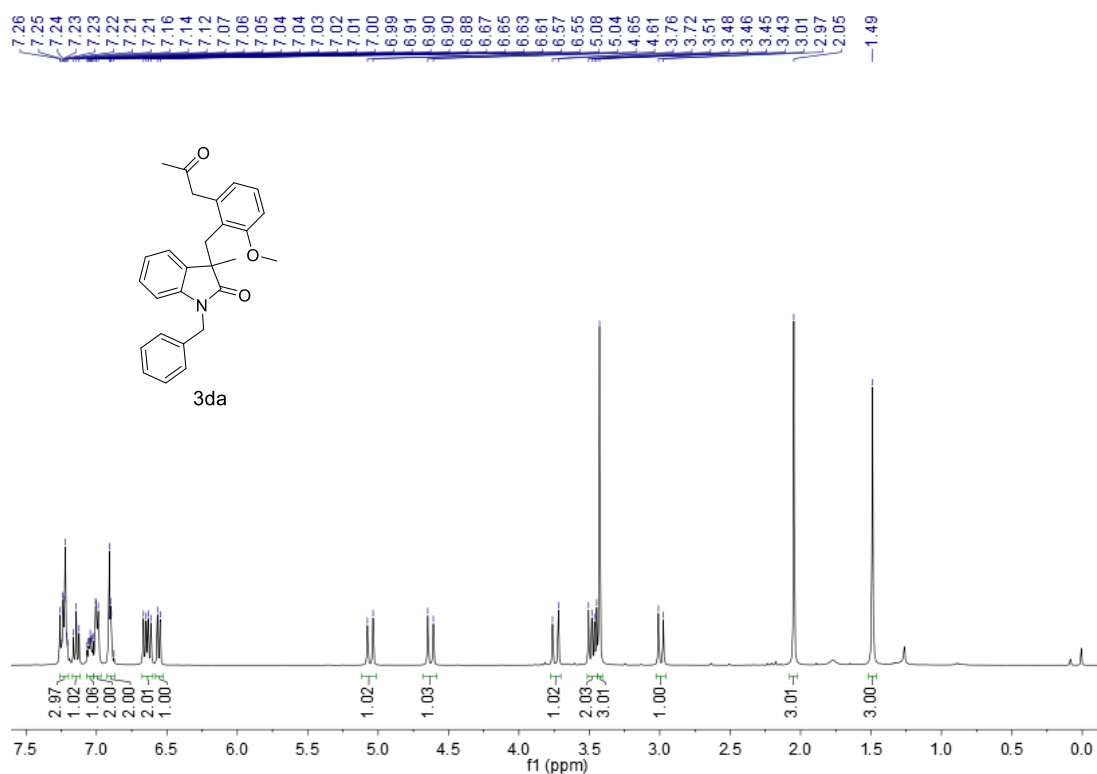

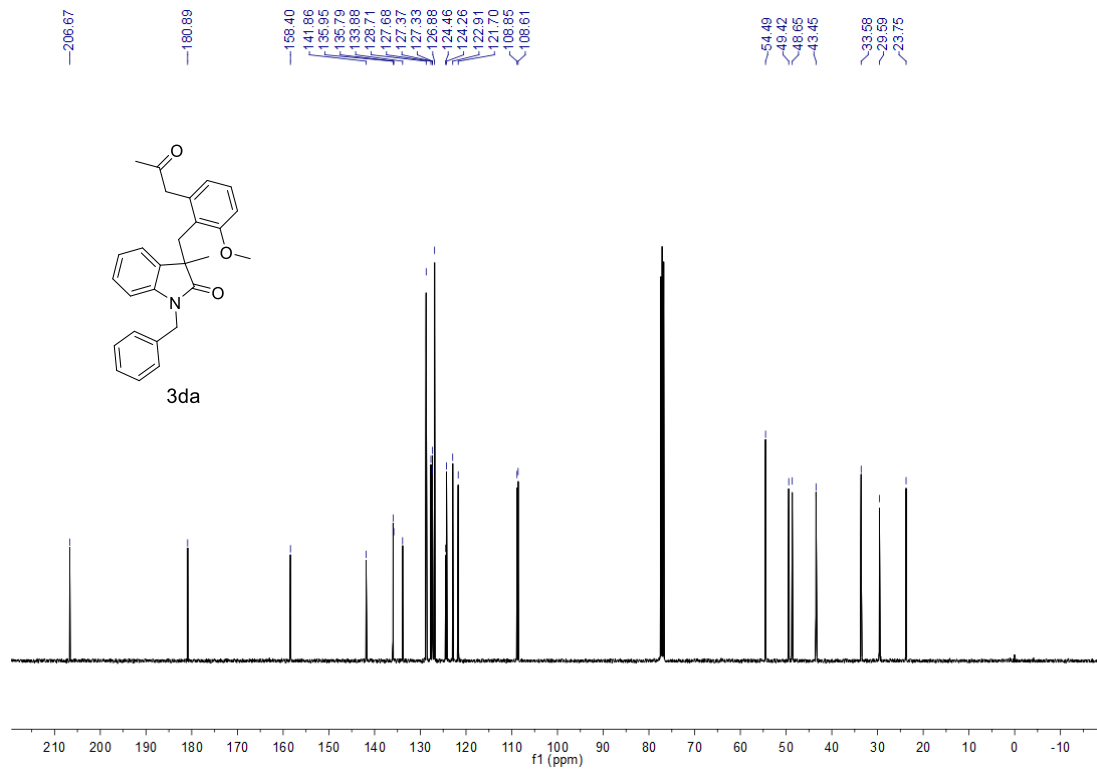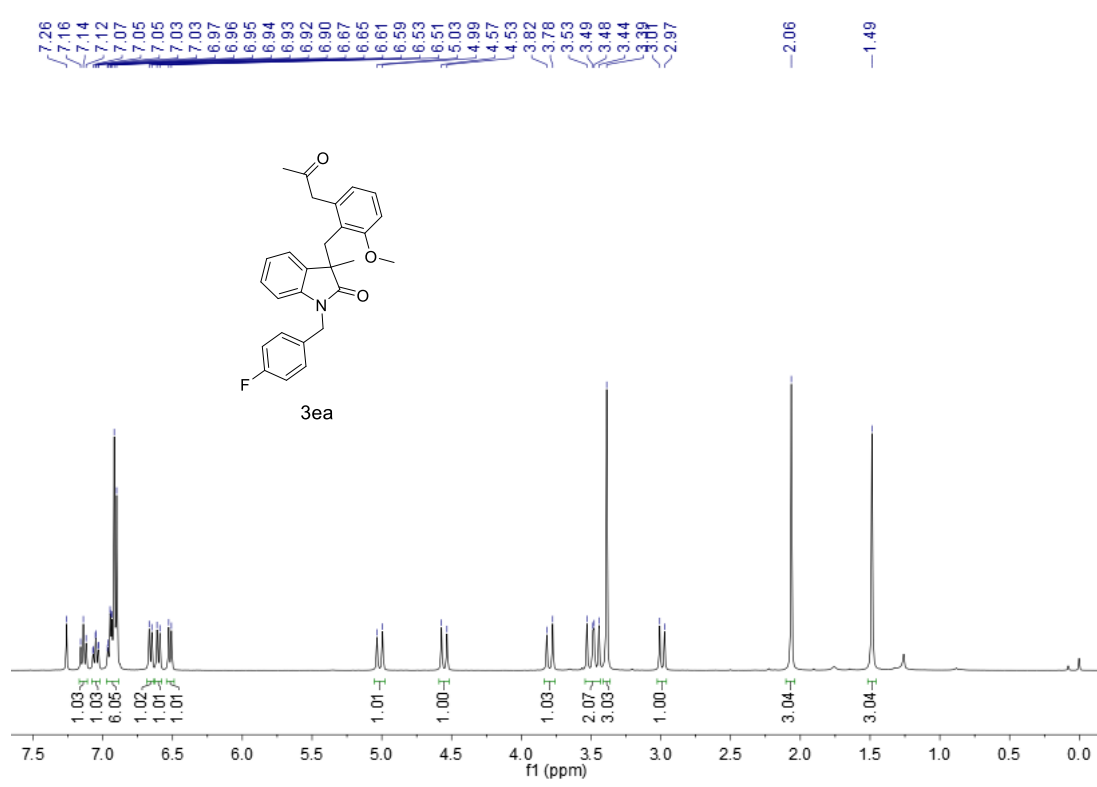

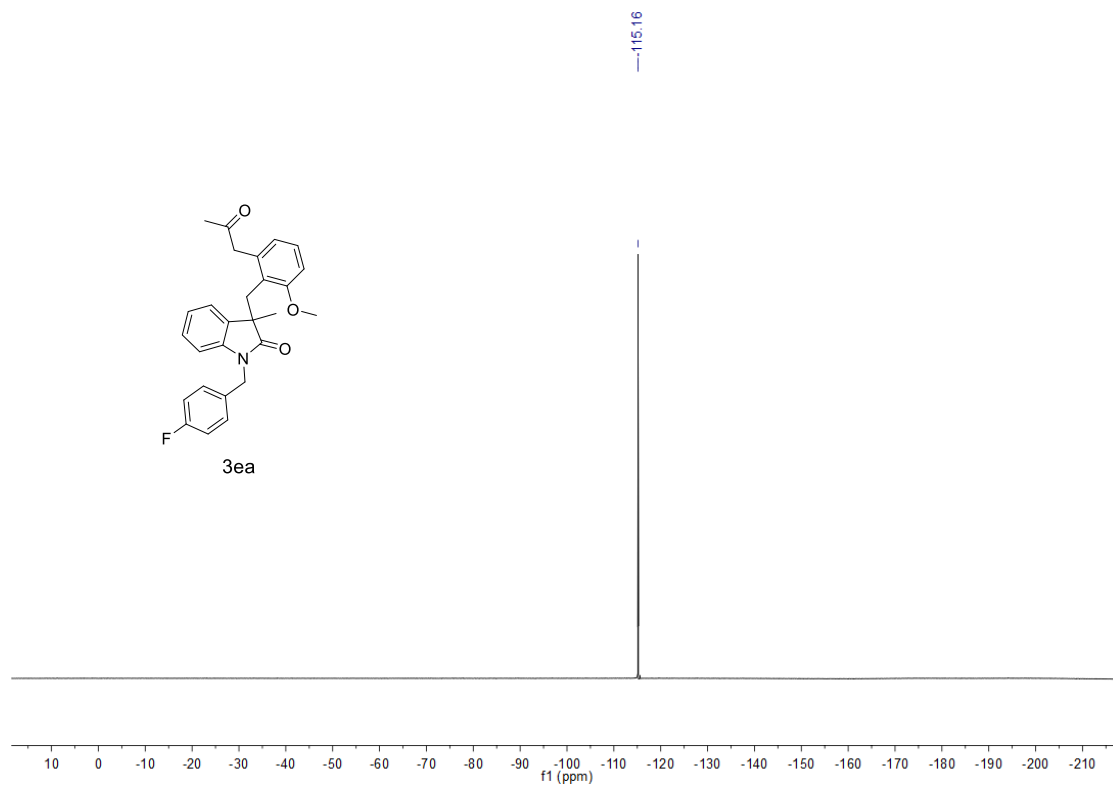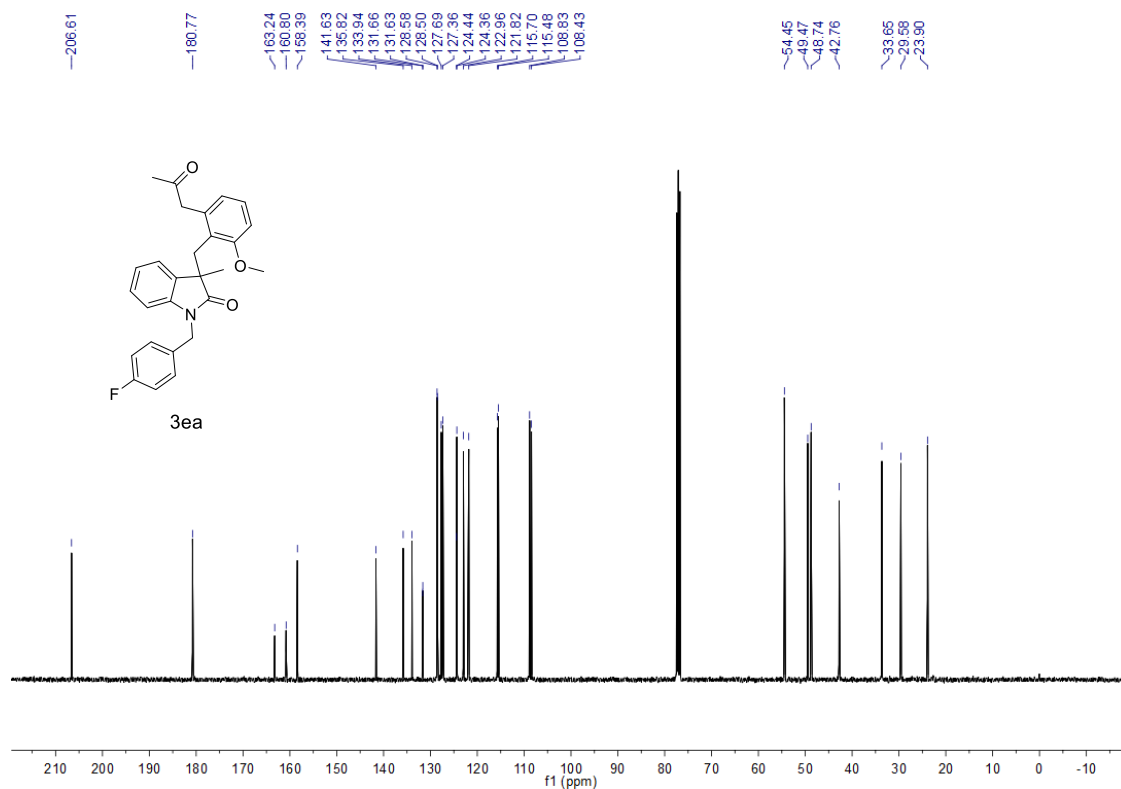

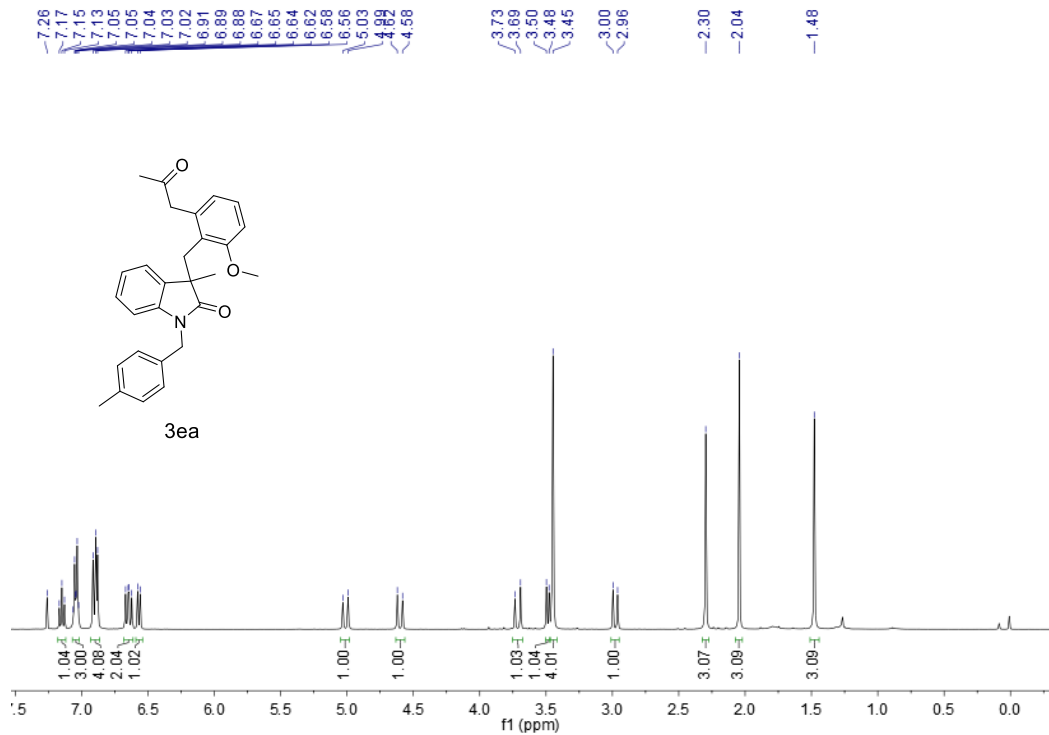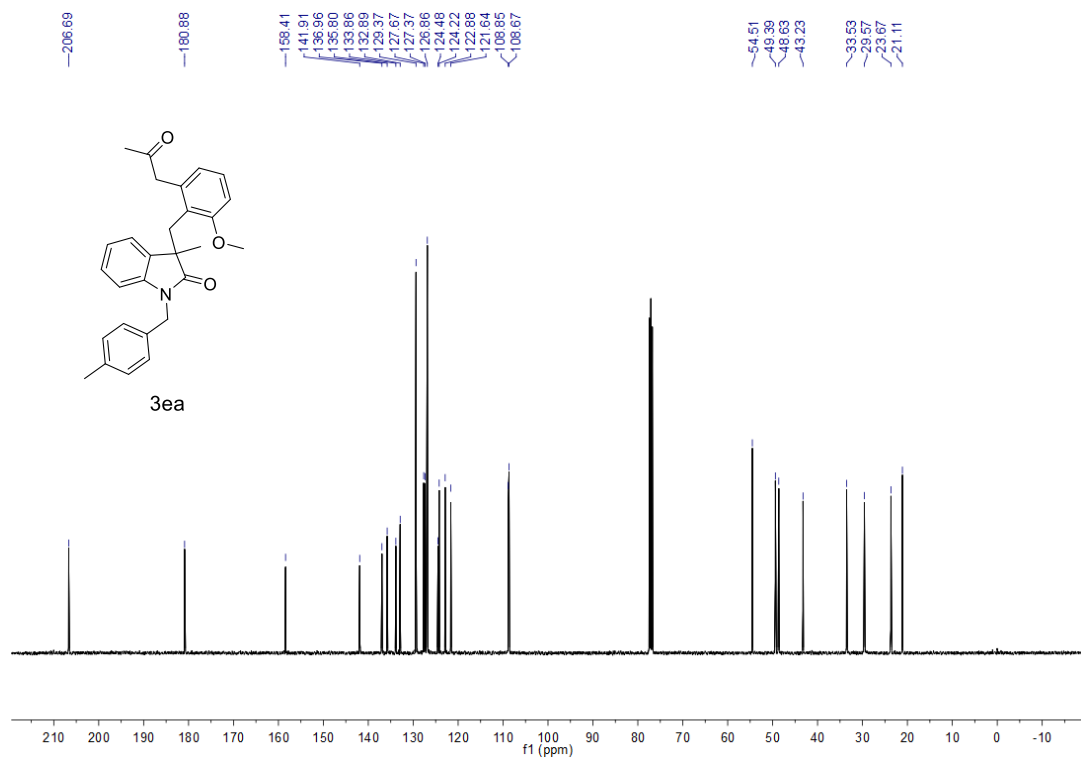

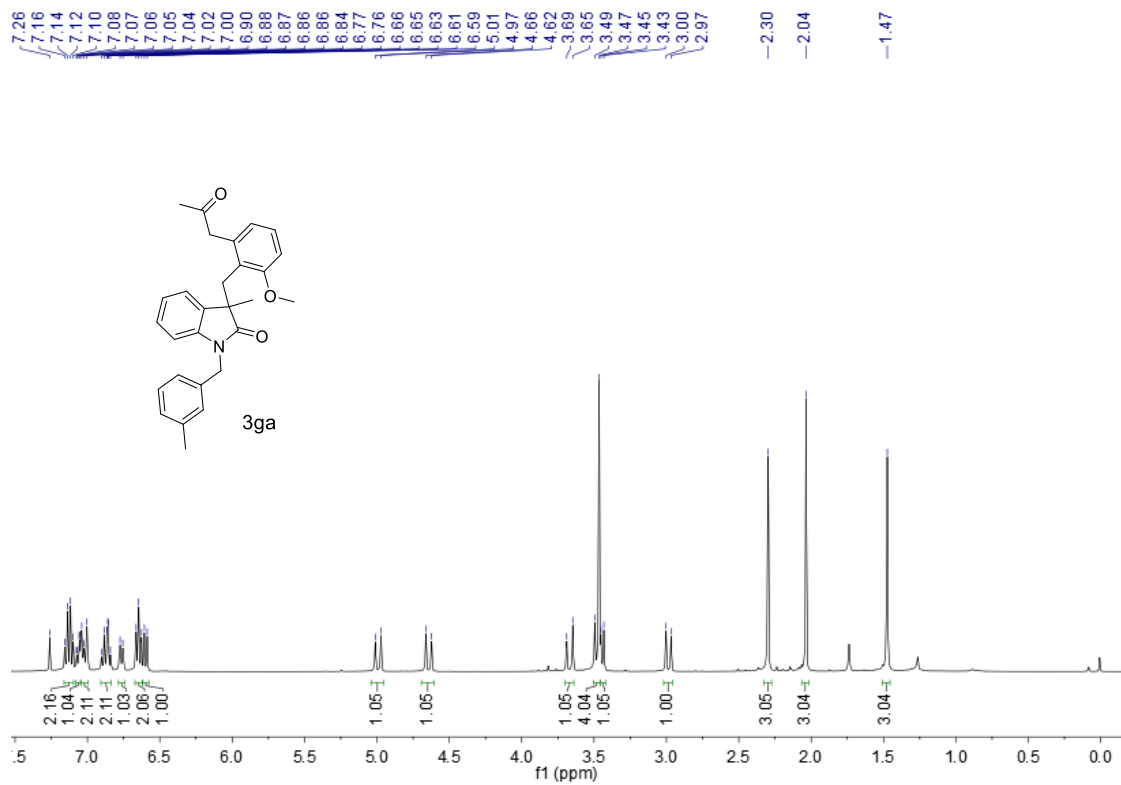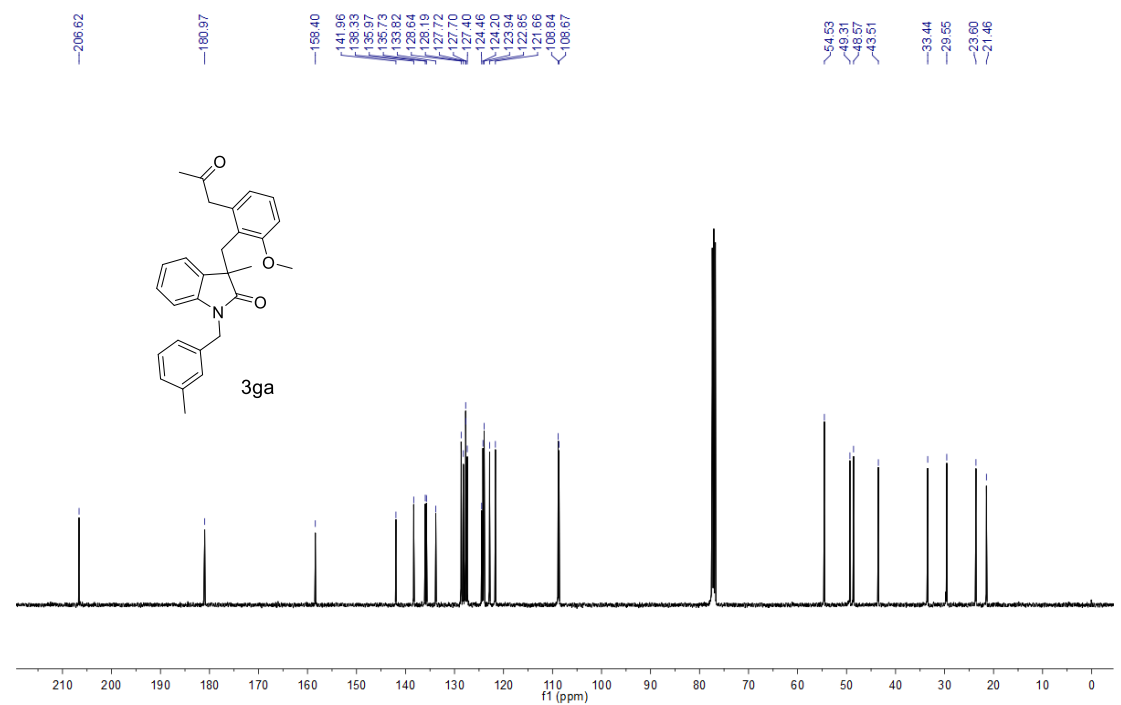

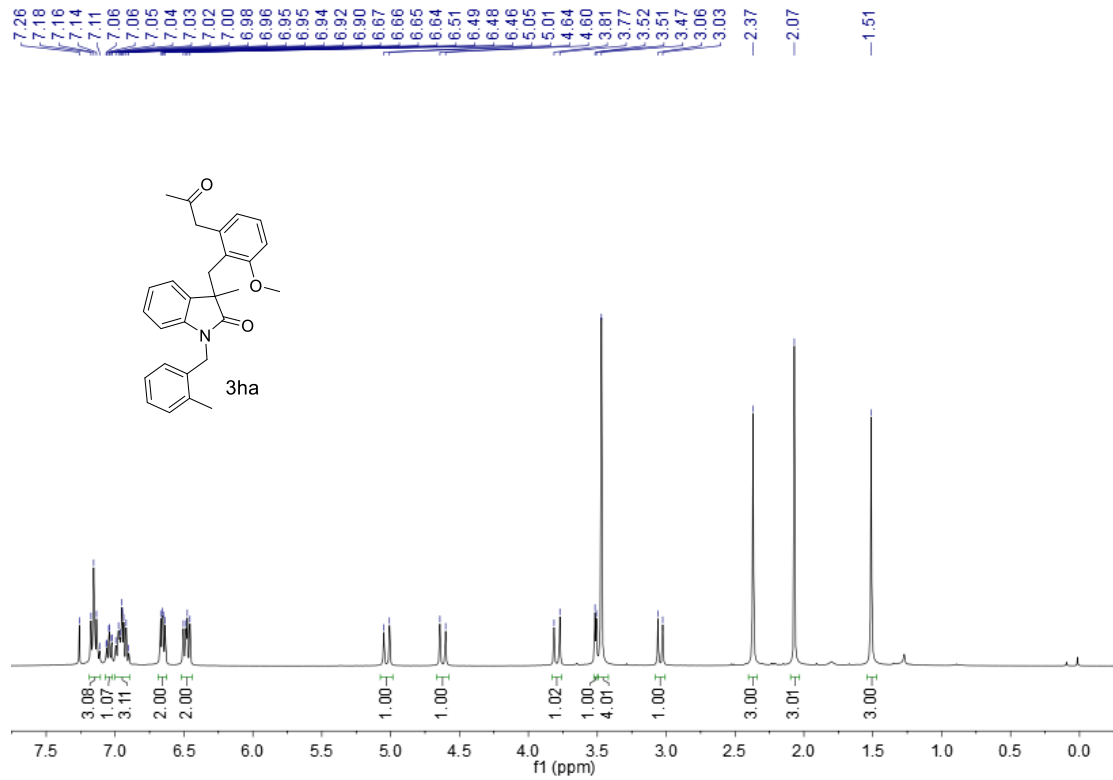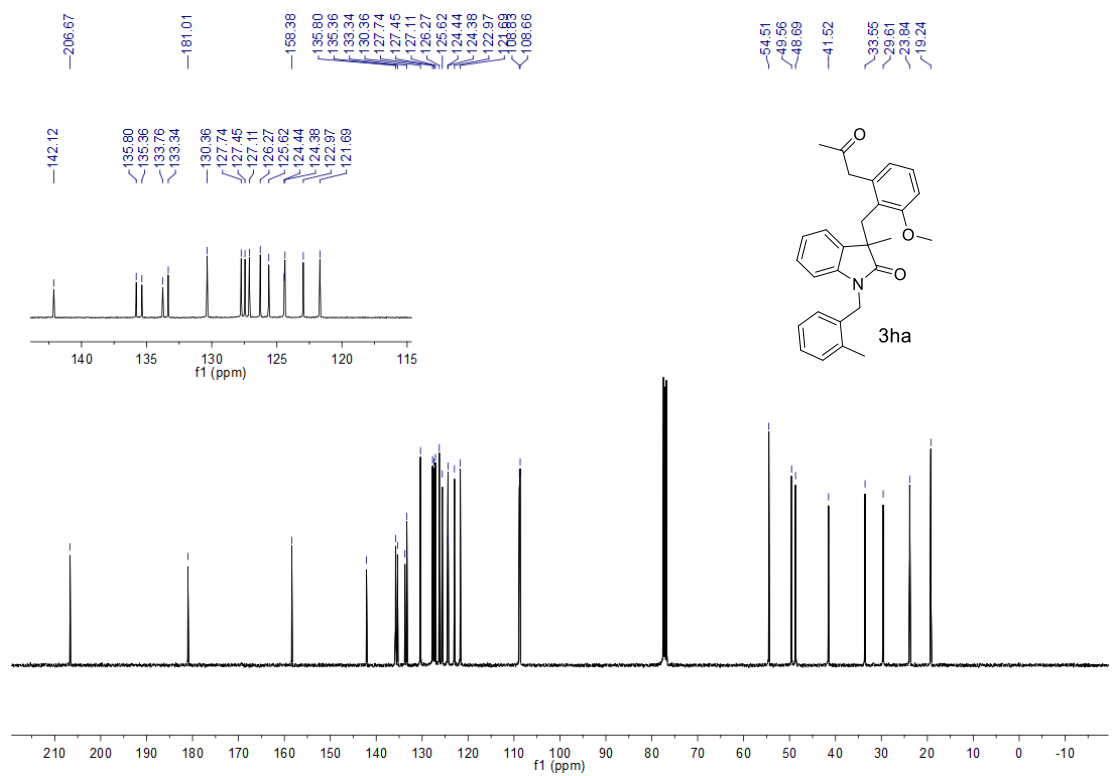

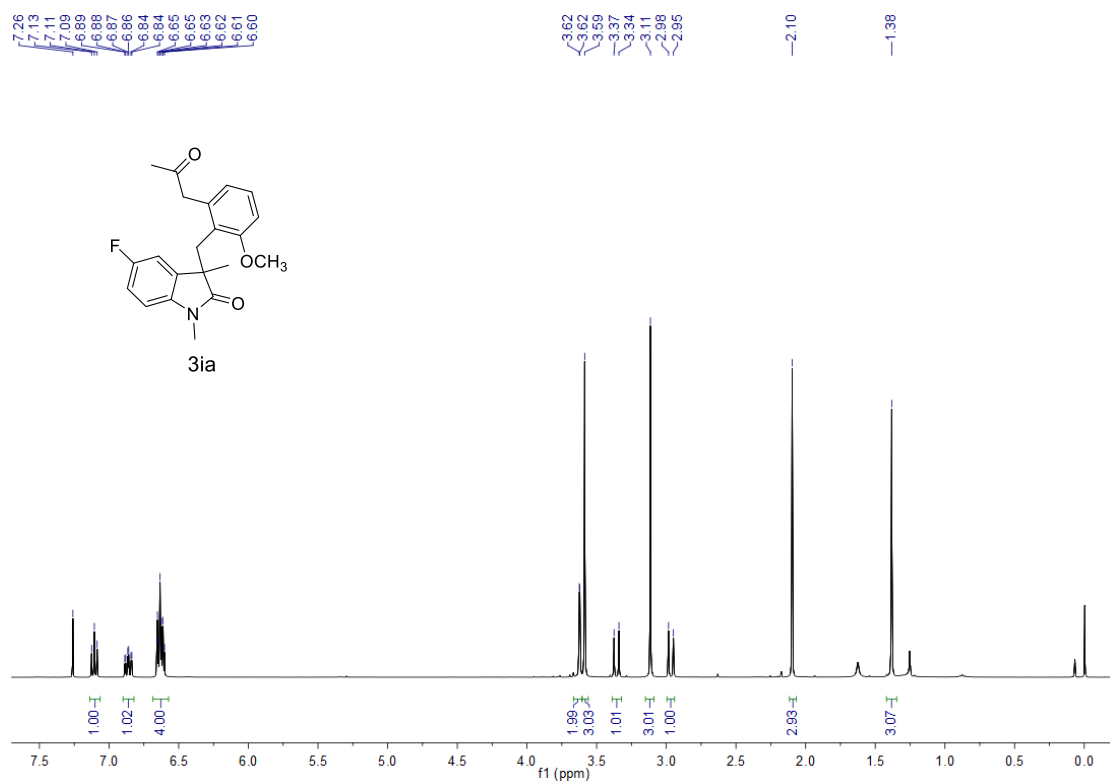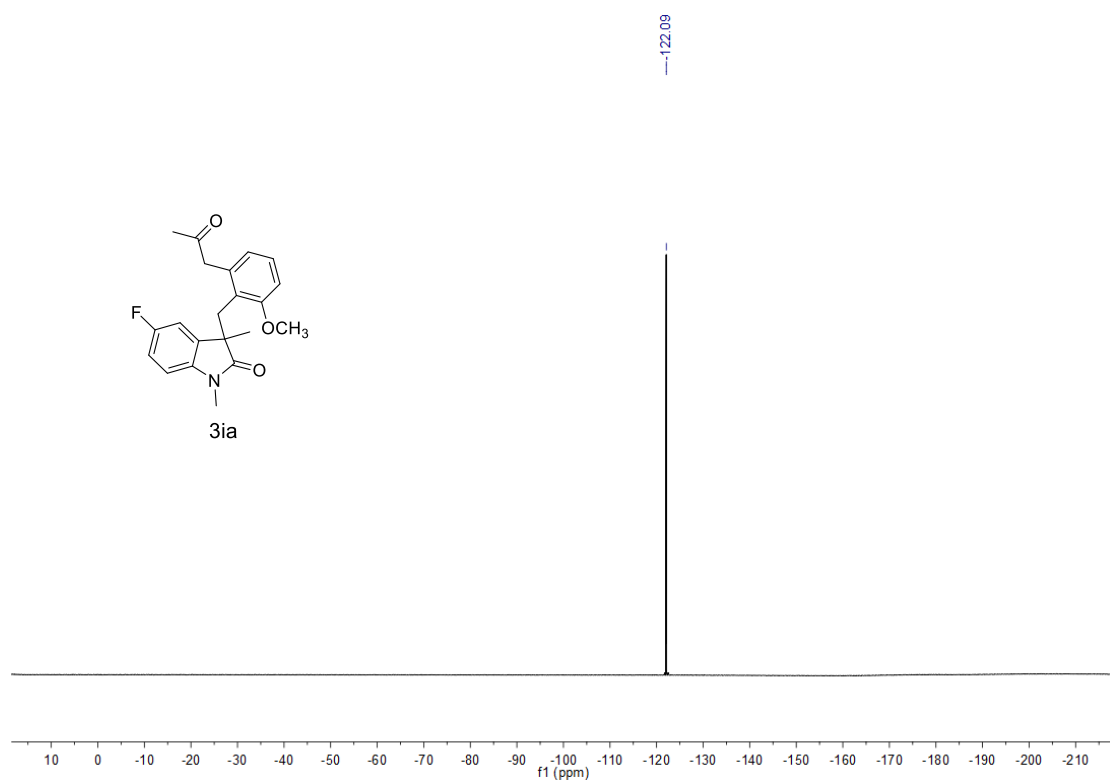



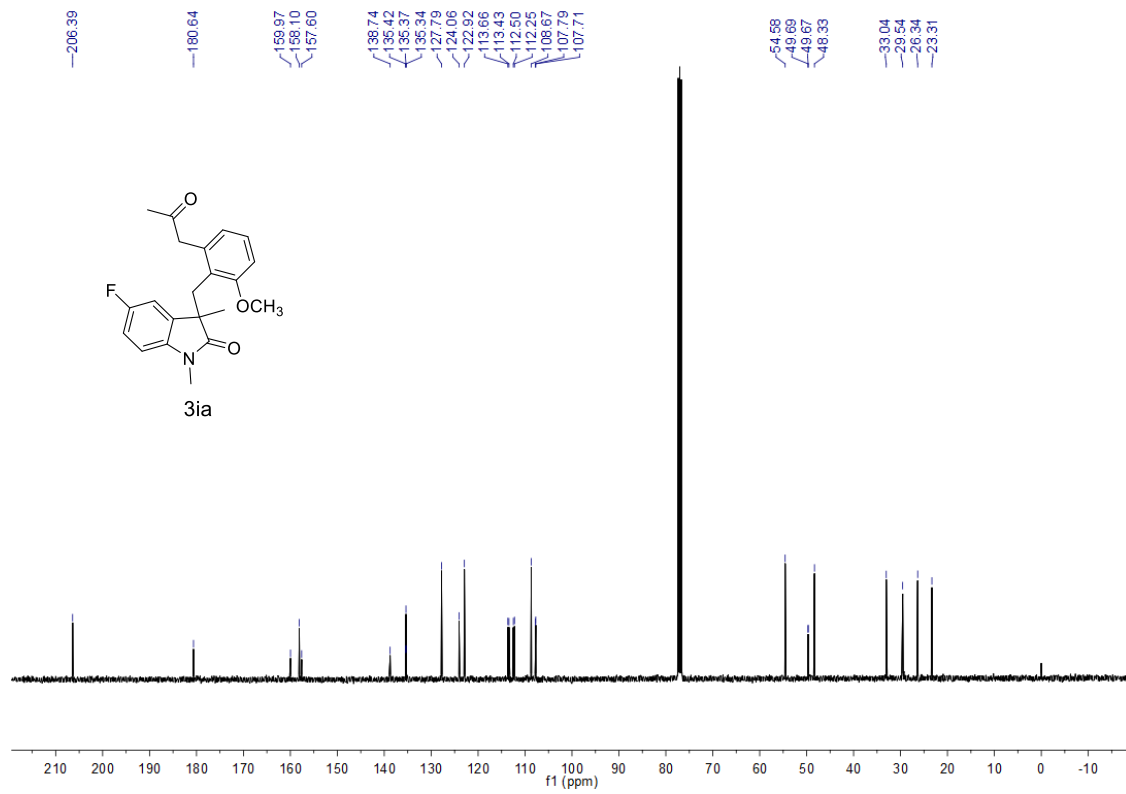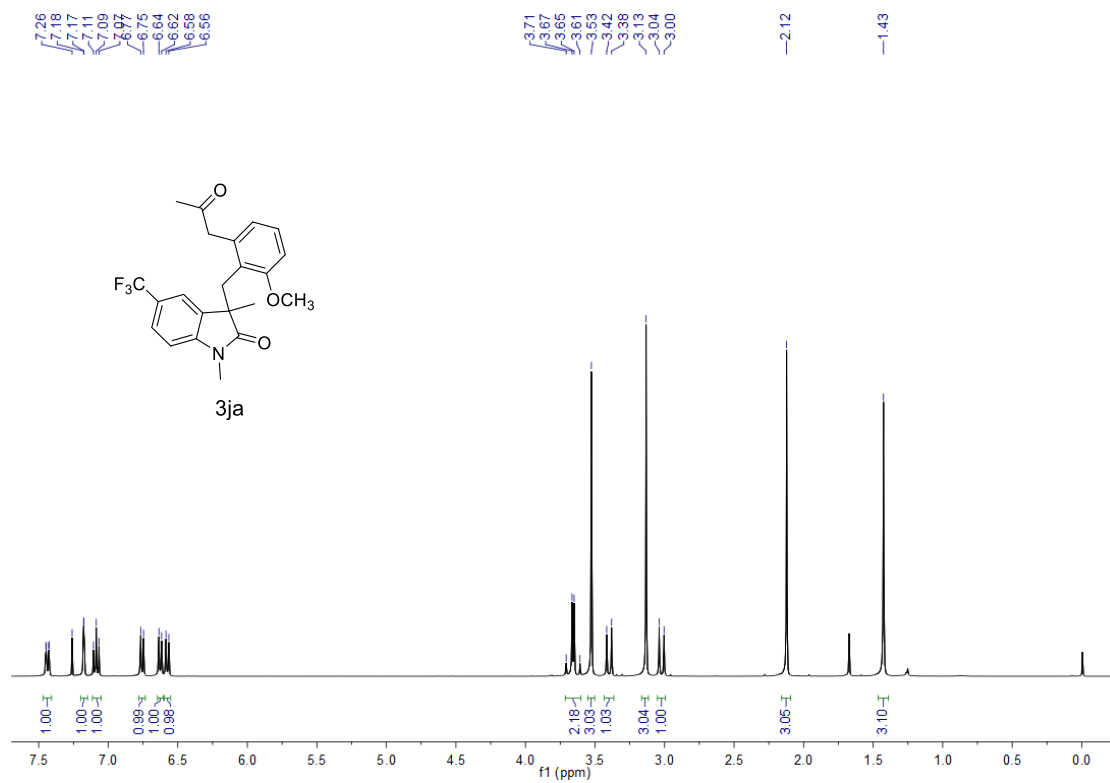

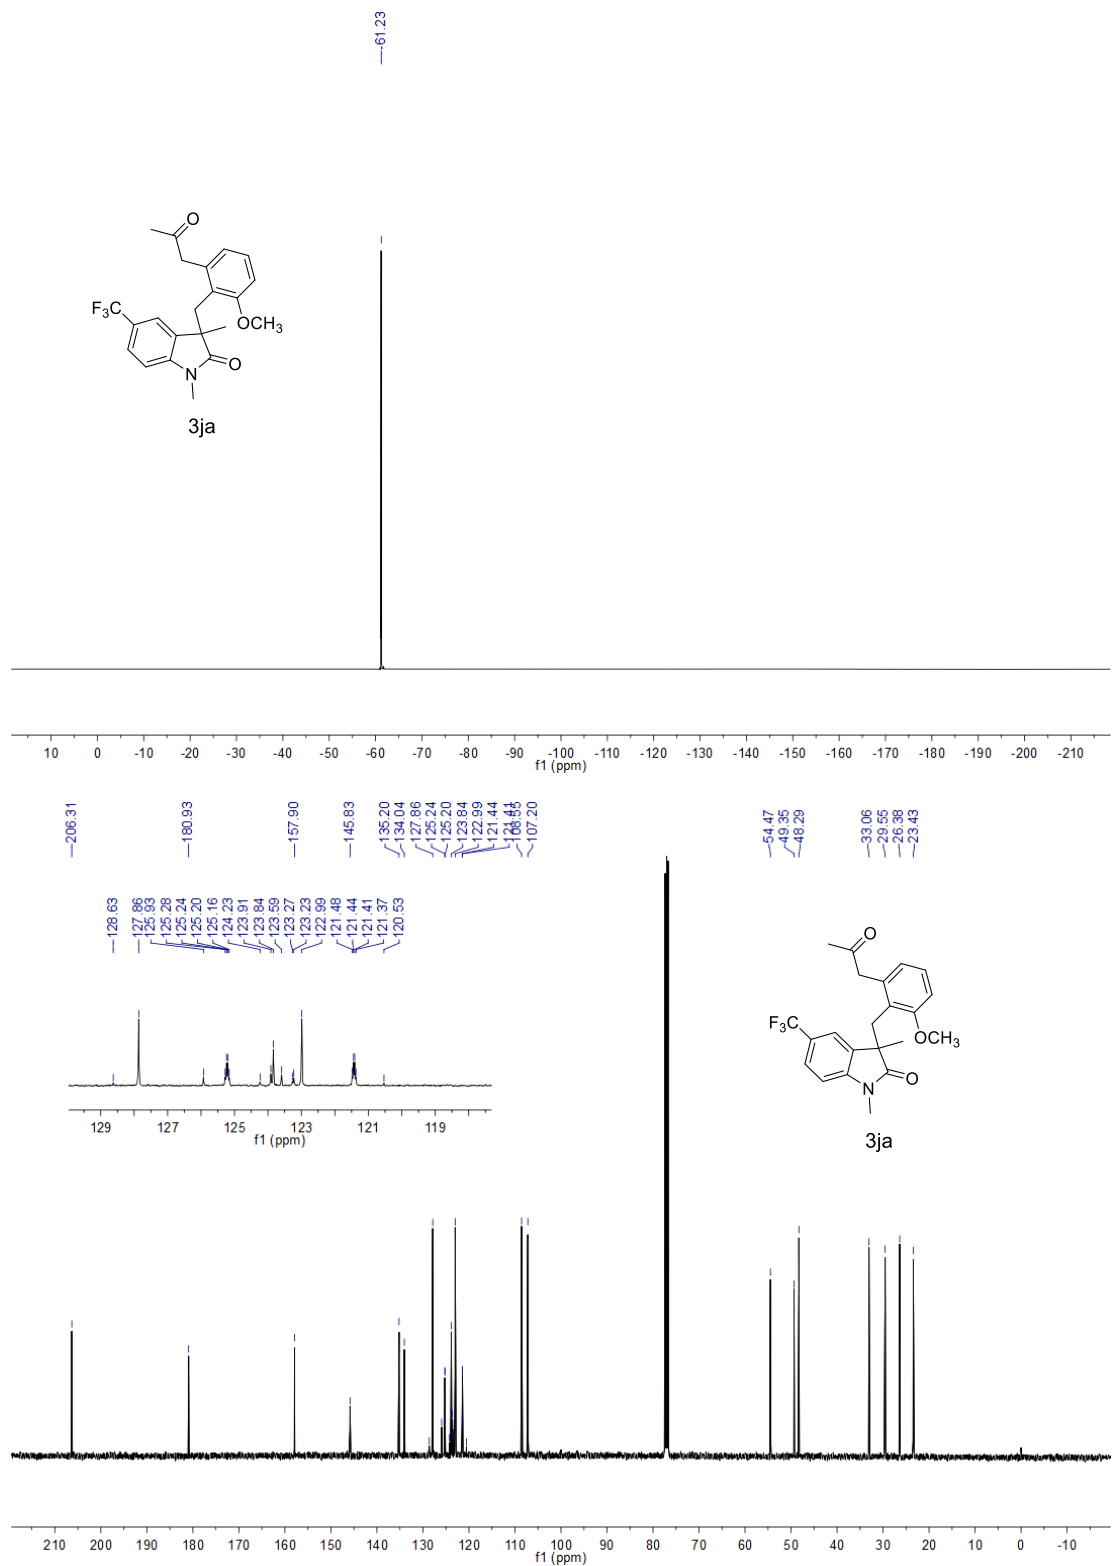

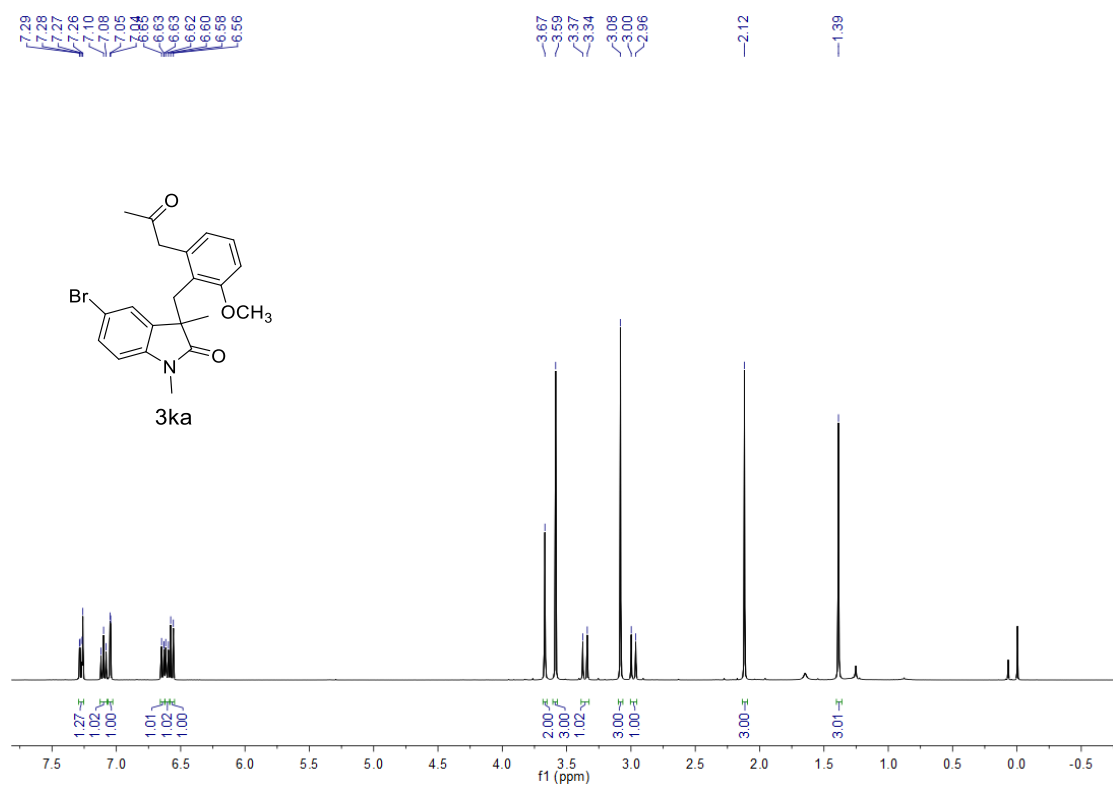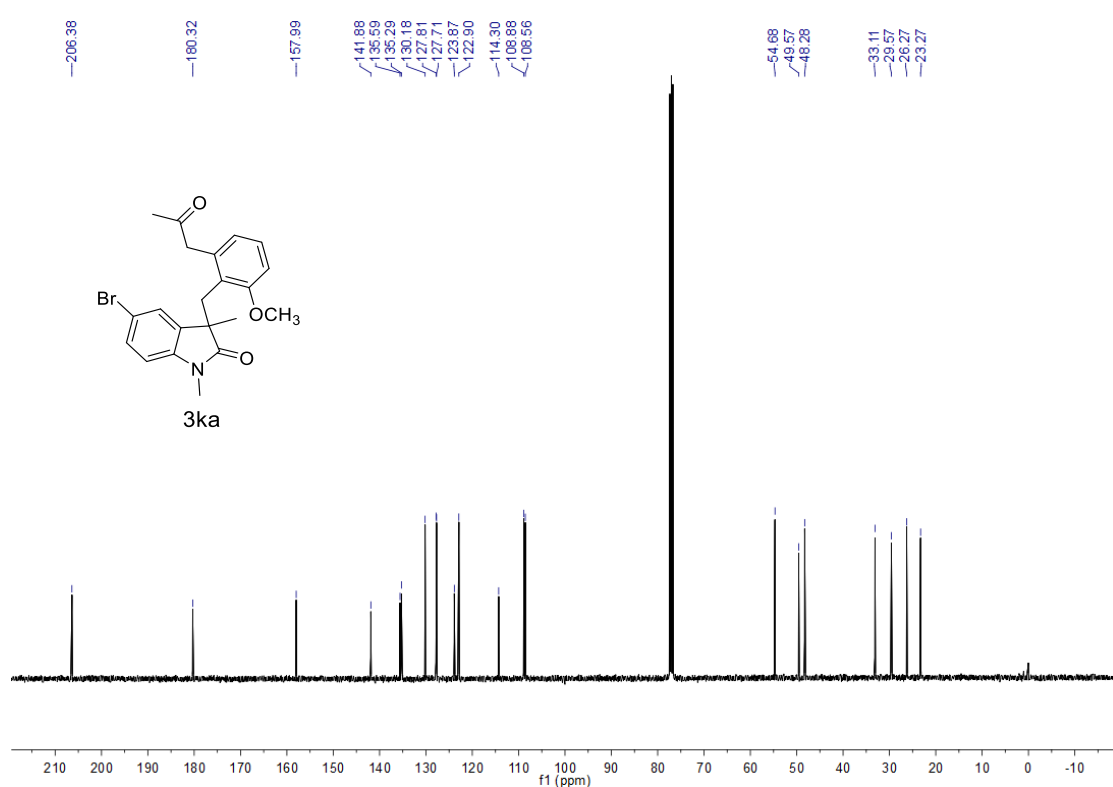

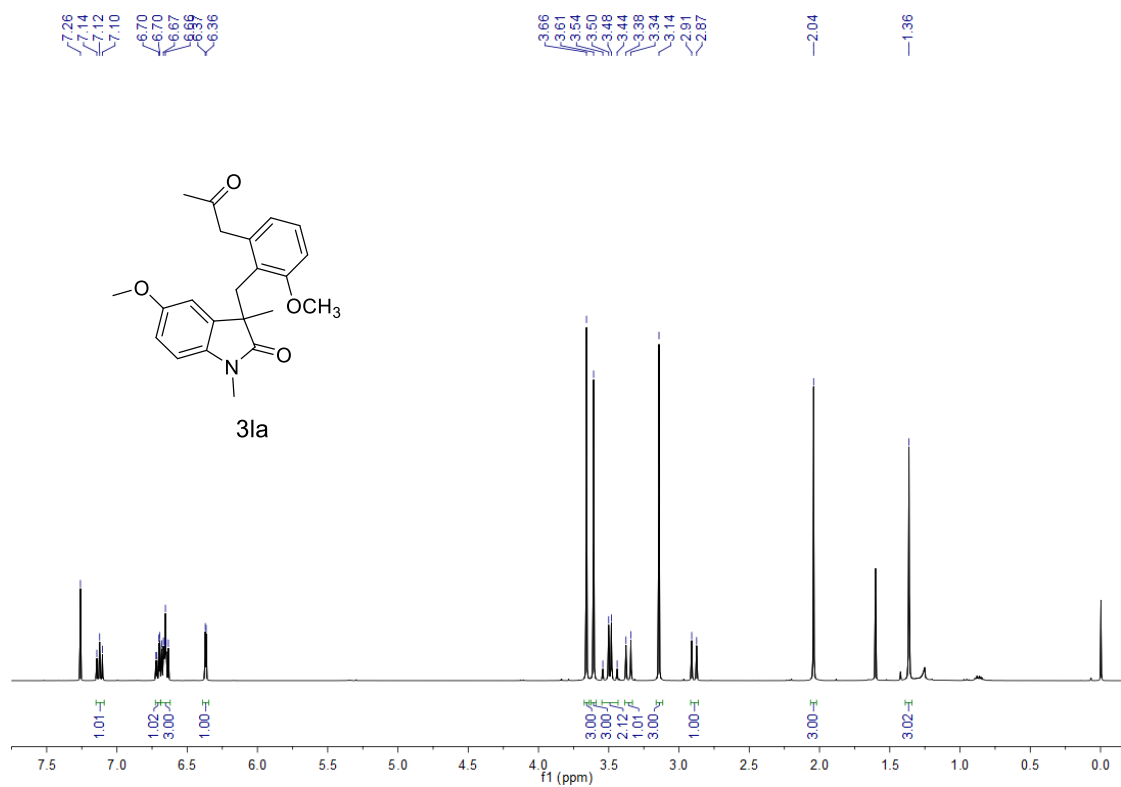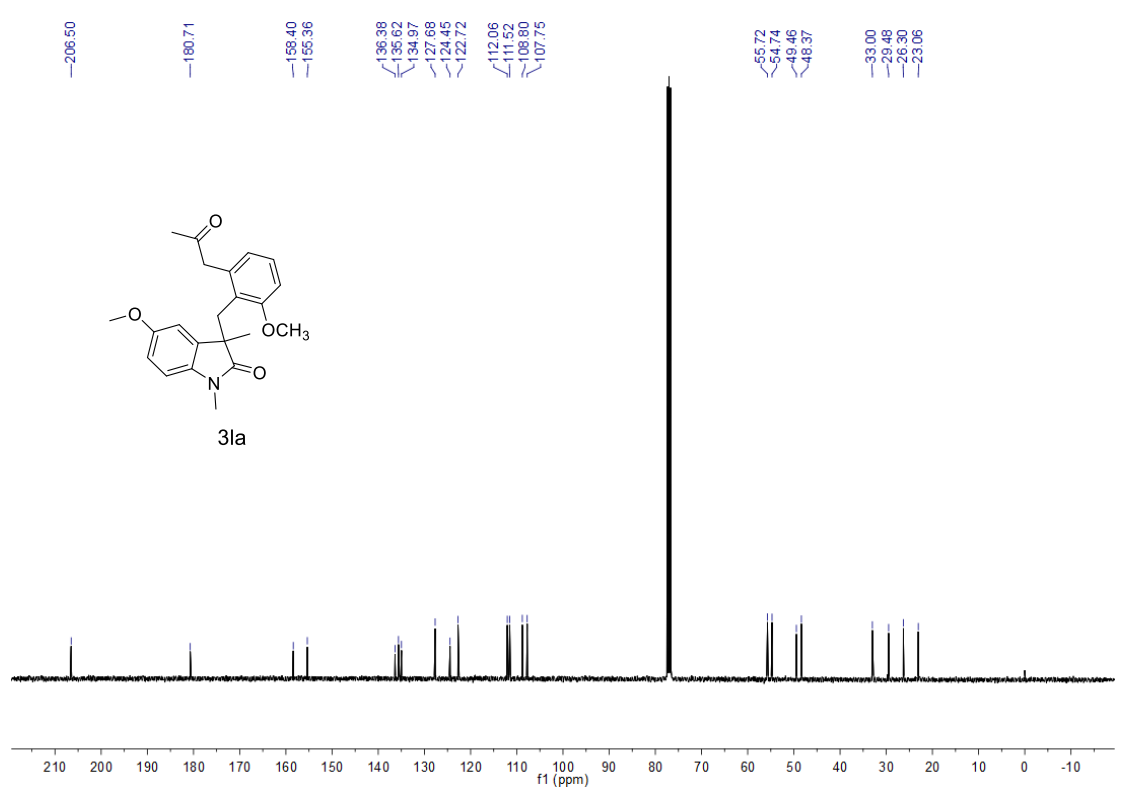

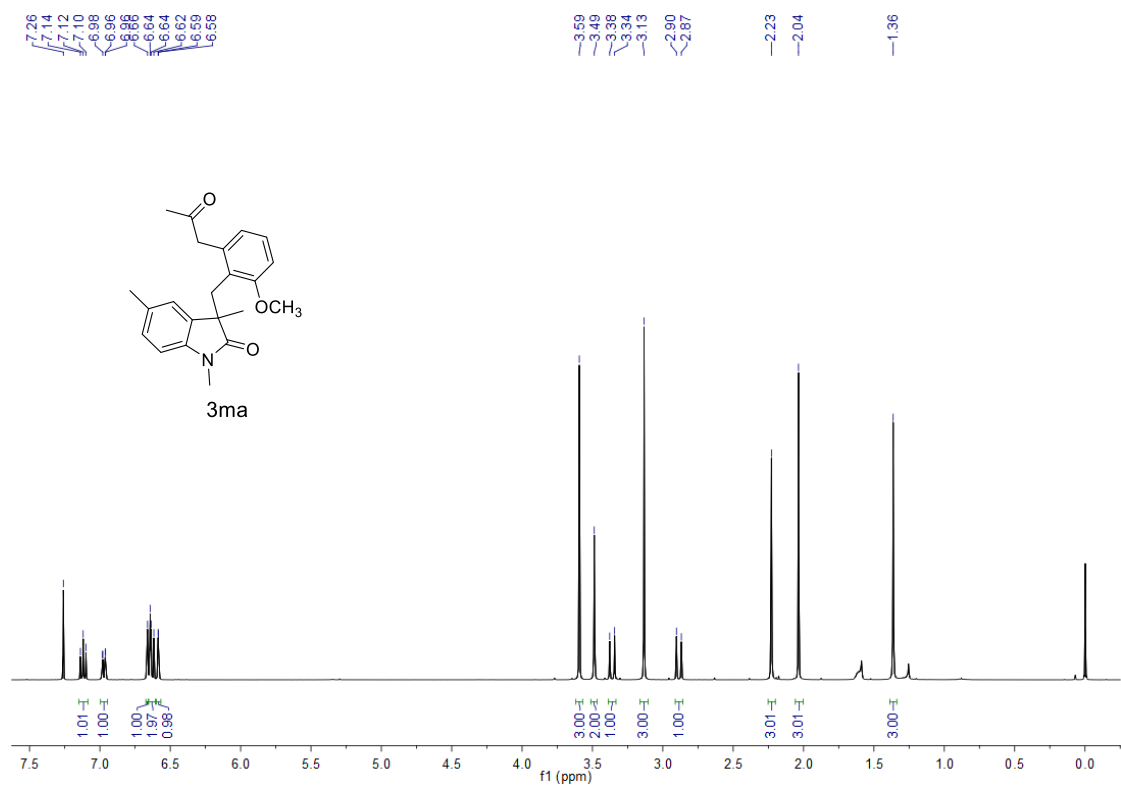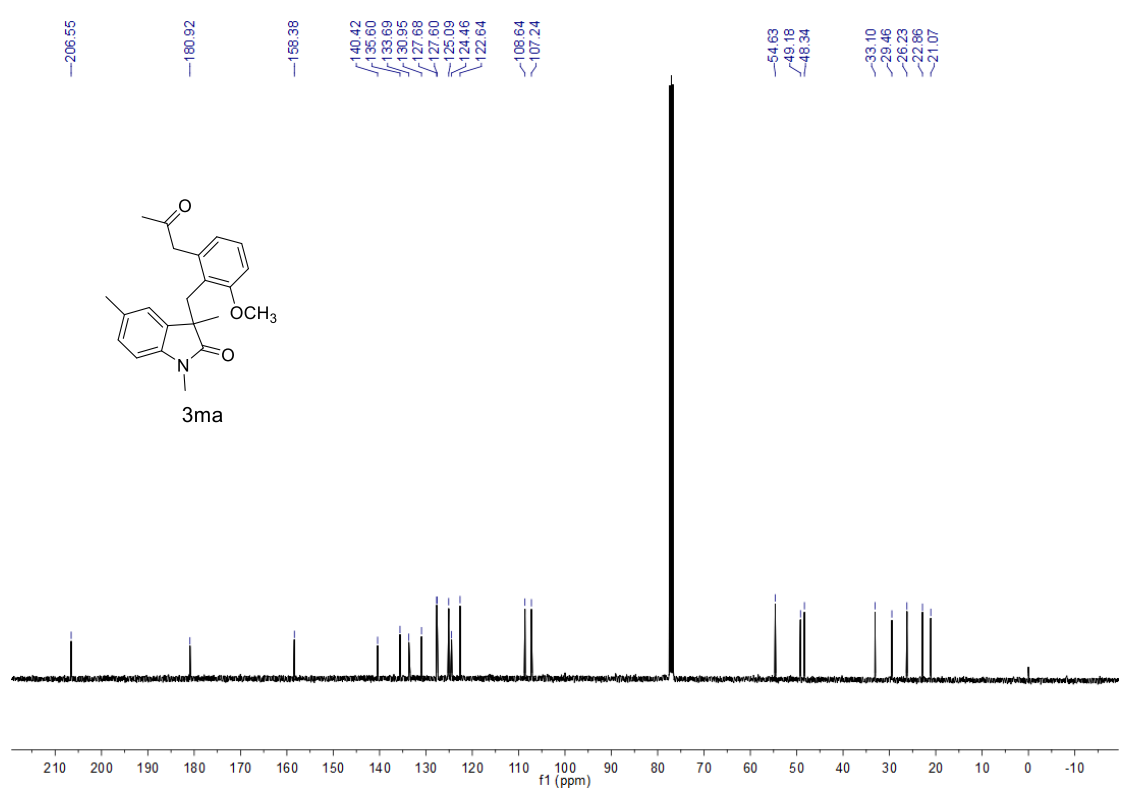

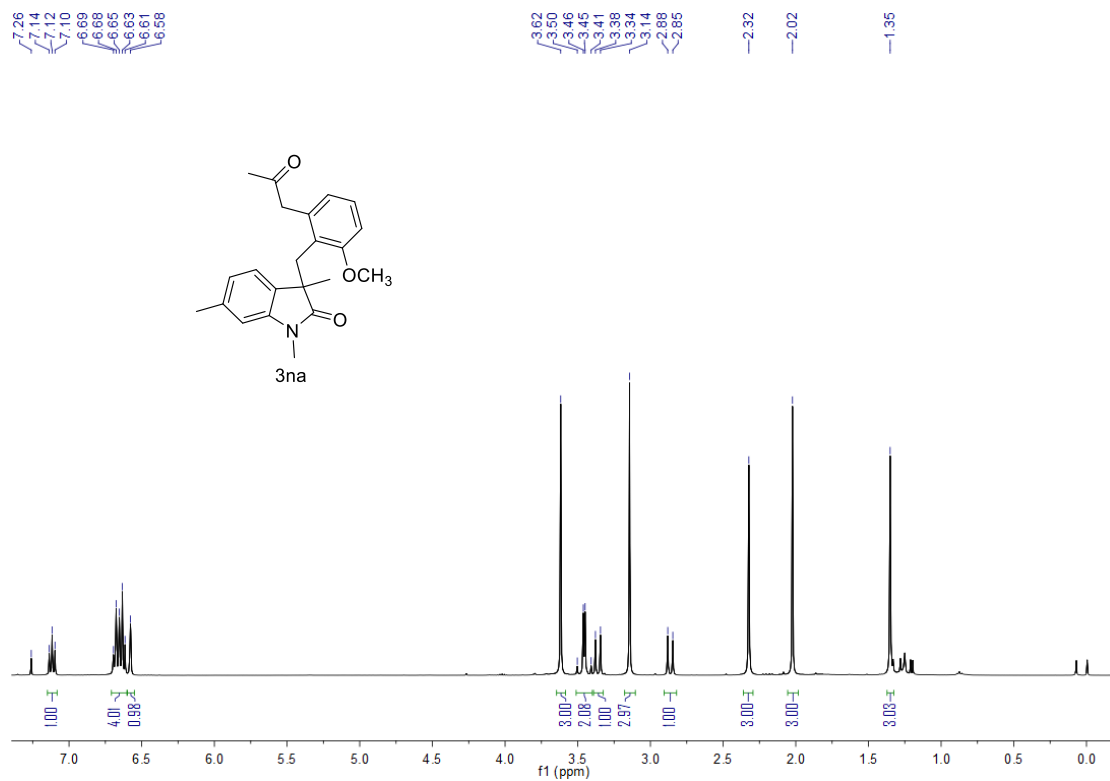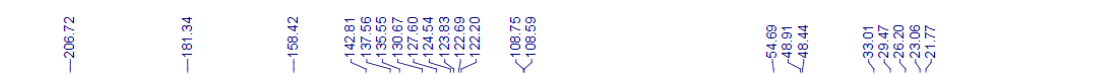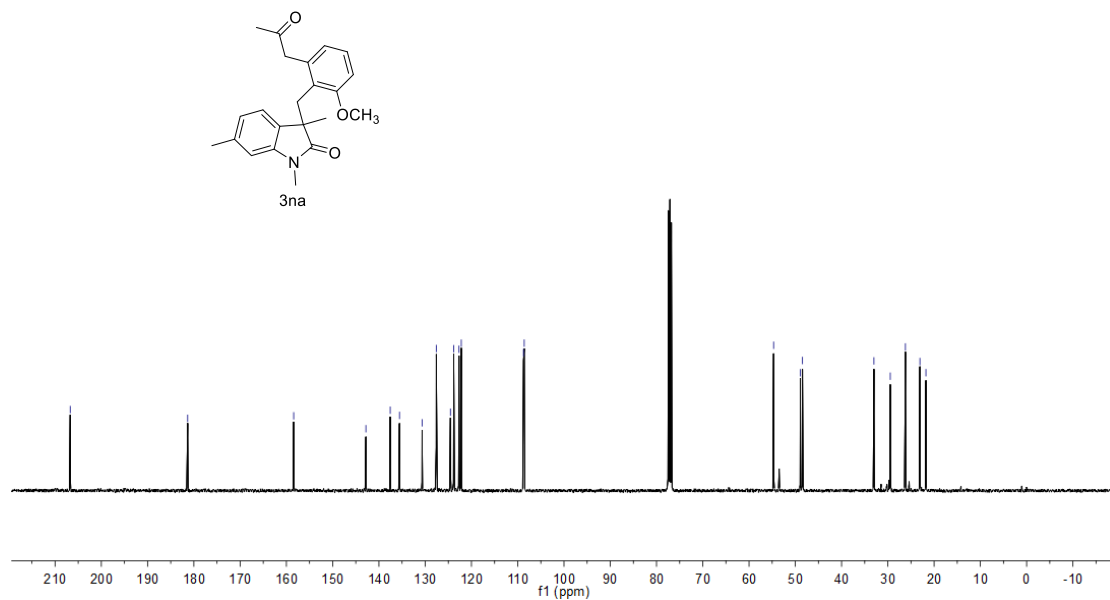

Supplement: d1ob02440j1.pdf [file d1ob02440j1.pdf]
